# Supplementary material for: Computational study on C–B homolytic bond dissociation enthalpies of organoboron compounds
Source: Royal Society of Chemistry journal article supplement (doi:10.1039/c6nj02887j), 2016-12-13
Supplement: c6nj02887j1.pdf [file c6nj02887j1.pdf]

## Supporting Information

### Computational Study on C-B Homolytic Bond Dissociation Enthalpies of Organoboron Compounds

Jiaoyang Wang, Wenrui Zheng\*, Lanlan Ding, Yingxing Wang

College of Chemistry and Chemical Engineering, Shanghai University of Engineering Science, Shanghai 201620, China

**Table S1** The 64 C-B BDEs calculated by six composite high-level *ab initio* methods (kJ/mol)

| Entry | Molecules                                                                                                                        | G3    | G4    | G3B3  | series G |         | CBS-QB3 | CBS-4M | CBS-Q | series CBS |         | Six methods<br>Average |
|-------|----------------------------------------------------------------------------------------------------------------------------------|-------|-------|-------|----------|---------|---------|--------|-------|------------|---------|------------------------|
|       |                                                                                                                                  |       |       |       | Average  | Max-Min |         |        |       | Average    | Max-Min |                        |
| 1     | CH <sub>3</sub> CH=CH-B(OH) <sub>2</sub>                                                                                         | 486.4 | 479.8 | 485.6 | 483.9    | 6.6     | 487.1   | 485.9  | 489.9 | 487.6      | 4.0     | 485.8                  |
| 2     | H <sub>2</sub> C=CH-B(OH) <sub>2</sub>                                                                                           | 479.4 | 473.1 | 478.7 | 477.1    | 6.3     | 480.2   | 479.4  | 479.8 | 479.8      | 0.8     | 478.4                  |
| 3     | $\begin{array}{c} \text{H}_2\text{C}=\text{C}-\text{B}(\text{OH})_2 \\   \\ \text{CH}_3 \end{array}$                             | 468.7 | 459.1 | 467.0 | 464.9    | 9.6     | 467.7   | 464.6  | 470.4 | 467.6      | 5.8     | 466.3                  |
| 4     | $\begin{array}{c} \text{H}_2\text{C}=\text{C}-\text{B}(\text{OH})_2 \\   \\ \text{CH}_2\text{CH}_3 \end{array}$                  | 469.5 | 458.4 | 467.9 | 465.3    | 11.1    | 468.5   | 464.3  | 471.2 | 468.0      | 6.9     | 466.6                  |
| 5     | $\begin{array}{c} \text{H}_3\text{CHC}=\text{C}-\text{B}(\text{OH})_2 \\   \\ \text{CH}_3 \end{array}$                           | 464.7 | 453.5 | 463.1 | 460.4    | 11.2    | 463.8   | 458.8  | 466.3 | 463.0      | 7.5     | 461.7                  |
| 6     | C <sub>2</sub> H <sub>5</sub> HC=CH-B(OH) <sub>2</sub>                                                                           | 488.2 | 478.1 | 486.6 | 484.3    | 10.1    | 488.1   | 487.1  | 494.5 | 489.9      | 7.4     | 487.1                  |
| 7     | $\begin{array}{c} \text{H}_2\text{C}=\text{CH}-\text{B}-\text{OH} \\   \\ \text{CH}_3 \end{array}$                               | 479.2 | 472.4 | 477.2 | 476.3    | 6.8     | 479.8   | 480.1  | 480.5 | 480.1      | 0.7     | 478.2                  |
| 8     | $\begin{array}{c} \text{H}_3\text{CHC}=\text{CH}-\text{B}-\text{OH} \\   \\ \text{CH}_3 \end{array}$                             | 488.8 | 479.8 | 486.3 | 485.0    | 9.0     | 488.9   | 491.7  | 494.9 | 491.8      | 6.0     | 488.4                  |
| 9     | $\begin{array}{c} (\text{H}_3\text{C})_2\text{C}=\text{CH}-\text{B}-\text{OH} \\   \\ \text{CH}_3 \end{array}$                   | 486.6 | 476.3 | 484.4 | 482.4    | 10.3    | 486.5   | 482.4  | 495.6 | 488.2      | 13.2    | 485.3                  |
| 10    | $\begin{array}{c} \text{CH}_3 \\   \\ \text{H}_2\text{C}=\text{C}-\text{B}-\text{OH} \\   \\ \text{CH}_3 \end{array}$            | 472.3 | 458.6 | 465.3 | 465.4    | 13.7    | 471.6   | 469.9  | 473.9 | 471.8      | 4.0     | 468.6                  |
| 11    | $\begin{array}{c} \text{CH}_3 \\   \\ \text{H}_3\text{CHC}=\text{C}-\text{B}-\text{OH} \\   \\ \text{CH}_3 \end{array}$          | 473.0 | 457.6 | 466.3 | 465.6    | 15.4    | 468.1   | 465.2  | 477.2 | 470.2      | 12.0    | 467.9                  |
| 12    | $\begin{array}{c} \text{CH}_2\text{CH}_3 \\   \\ \text{H}_2\text{C}=\text{C}-\text{B}-\text{OH} \\   \\ \text{CH}_3 \end{array}$ | 473.7 | 462.7 | 470.8 | 469.1    | 11.0    | 472.7   | 470.7  | 476.7 | 473.4      | 6.0     | 471.2                  |
| 13    | H <sub>2</sub> C=CH-B(CH <sub>3</sub> ) <sub>2</sub>                                                                             | 477.3 | 471.9 | 475.6 | 474.9    | 5.4     | 478.5   | 480.4  | 478.6 | 479.2      | 1.9     | 477.1                  |
| 14    | H <sub>3</sub> CHC=CH-B(CH <sub>3</sub> ) <sub>2</sub>                                                                           | 486.2 | 479.0 | 484.4 | 483.2    | 7.2     | 487.1   | 488.5  | 490.4 | 488.7      | 3.3     | 485.9                  |
| 15    | (H <sub>3</sub> C) <sub>2</sub> C=CH-B(CH <sub>3</sub> ) <sub>2</sub>                                                            | 478.4 | 470.0 | 476.5 | 475.0    | 8.4     | 479.0   | 478.3  | 485.6 | 481.0      | 7.3     | 478.0                  |
| 16    | $\begin{array}{c} \text{H}_2\text{C}=\text{C}-\text{B}(\text{CH}_3)_2 \\   \\ \text{CH}_3 \end{array}$                           | 463.1 | 455.9 | 461.3 | 460.1    | 7.2     | 463.5   | 462.7  | 463.8 | 463.3      | 1.1     | 461.7                  |
| 17    | $\begin{array}{c} \text{H}_3\text{CHC}=\text{C}-\text{B}(\text{CH}_3)_2 \\   \\ \text{CH}_3 \end{array}$                         | 464.4 | 455.4 | 462.5 | 460.8    | 9.0     | 464.6   | 462.9  | 466.2 | 464.6      | 3.3     | 462.7                  |
| 18    | $\begin{array}{c} \text{H}_2\text{C}=\text{C}-\text{B}(\text{CH}_3)_2 \\   \\ \text{C}_2\text{H}_5 \end{array}$                  | 462.8 | 453.8 | 460.9 | 459.2    | 9.0     | 462.9   | 461.6  | 463.5 | 462.7      | 1.9     | 460.9                  |
| 19    | C <sub>2</sub> H <sub>5</sub> HC=CH-B(CH <sub>3</sub> ) <sub>2</sub>                                                             | 473.0 | 464.1 | 470.5 | 469.2    | 8.9     | 473.1   | 472.8  | 481.8 | 475.9      | 9.0     | 472.6                  |
| 20    | $\begin{array}{c} \text{H}_2\text{C}=\text{CH}-\text{B}-\text{OH} \\   \\ \text{C}_2\text{H}_5 \end{array}$                      | 475.1 | 474.6 | 473.6 | 474.4    | 1.5     | 475.6   | 476.1  | 476.9 | 476.2      | 1.3     | 475.3                  |
| 21    | $\begin{array}{c} \text{H}_2\text{C}=\text{CH}-\text{B}-\text{OH} \\   \\ \text{CH}(\text{CH}_3)_2 \end{array}$                  | 482.9 | 473.1 | 480.6 | 478.9    | 9.8     | 482.9   | 482.9  | 487.5 | 484.4      | 4.6     | 481.7                  |
| 22    | $\begin{array}{c} \text{CH}_3 \\   \\ \text{H}_2\text{C}=\text{C}-\text{B}-\text{OH} \\   \\ \text{C}_2\text{H}_5 \end{array}$   | 465.9 | 462.8 | 463.9 | 464.2    | 3.1     | 465.2   | 461.1  | 468.4 | 464.9      | 7.3     | 464.6                  |
| 23    | $\begin{array}{c} \text{H}_3\text{CHC}=\text{CH}-\text{B}-\text{OH} \\   \\ \text{C}_2\text{H}_5 \end{array}$                    | 482.8 | 480.2 | 481.0 | 481.3    | 2.6     | 482.9   | 482.8  | 489.2 | 485.0      | 6.4     | 483.2                  |
| 24    | H <sub>2</sub> C=CH-B(C <sub>2</sub> H <sub>5</sub> ) <sub>2</sub>                                                               | 478.9 | 470.7 | 476.6 | 475.4    | 8.2     | 478.9   | 480.5  | 480.8 | 480.1      | 1.9     | 477.7                  |
| 25    | H <sub>3</sub> C-B(OH) <sub>2</sub>                                                                                              | 438.5 | 435.4 | 438.5 | 437.5    | 3.1     | 442.3   | 441.3  | 440.8 | 441.5      | 1.5     | 439.5                  |

\* Corresponding author. Tel.: +86 21 67791216; fax: +86 21 67791220.  
E-mail address: wrzheng@sues.edu.cn (W.R. Zheng).

|    |                                                                            |       |       |       |       |      |       |       |       |       |      |       |
|----|----------------------------------------------------------------------------|-------|-------|-------|-------|------|-------|-------|-------|-------|------|-------|
| 26 | $C_2H_5-B(OH)_2$                                                           | 427.4 | 421.3 | 426.6 | 425.1 | 6.1  | 429.3 | 426.7 | 429.0 | 428.3 | 2.6  | 426.7 |
| 27 | $(H_3C)_2HC-B(OH)_2$                                                       | 416.1 | 406.4 | 414.8 | 412.4 | 9.7  | 415.1 | 412.2 | 417.0 | 414.8 | 4.8  | 413.6 |
| 28 | $(H_3C)_3C-B(OH)_2$                                                        | 412.1 | 399.7 | 411.0 | 407.6 | 12.4 | 409.9 | 406.1 | 413.8 | 409.9 | 7.7  | 408.8 |
| 29 | $C_3H_7-B(OH)_2$                                                           | 432.0 | 424.0 | 431.4 | 429.1 | 8.0  | 433.1 | 430.8 | 434.9 | 432.9 | 4.1  | 431.0 |
| 30 | $C_4H_9-B(OH)_2$                                                           | 431.8 | 422.5 | 431.2 | 428.5 | 9.3  | 432.7 | 430.1 | 435.8 | 432.9 | 5.7  | 430.7 |
| 31 | $C_2H_5HC-B(OH)_2$<br>$CH_3$                                               | 417.5 | 406.9 | 416.6 | 413.7 | 10.6 | 416.5 | 412.9 | 419.3 | 416.2 | 6.4  | 415.0 |
| 32 | $(H_3C)_2CHCH_2-B(OH)_2$                                                   | 435.0 | 423.4 | 430.6 | 429.7 | 11.6 | 430.6 | 429.6 | 439.0 | 433.1 | 9.4  | 431.4 |
| 33 | $H_3C-B(CH_3)_2$                                                           | 430.0 | 427.9 | 429.7 | 429.2 | 2.1  | 434.8 | 436.1 | 433.9 | 434.9 | 2.2  | 432.1 |
| 34 | $C_2H_5-B(C_2H_5)_2$                                                       | 416.7 | 412.5 | 418.6 | 415.9 | 6.1  | 421.2 | 421.7 | 424.3 | 422.4 | 3.1  | 419.2 |
| 35 | $HC\equiv C-BF_2$                                                          | 612.4 | 601.6 | 605.8 | 606.6 | 10.8 | 608.8 | 598.3 | 615.7 | 607.6 | 17.4 | 607.1 |
| 36 | $HC\equiv C-BCl_2$                                                         | 599.7 | 589.6 | 592.8 | 594.0 | 10.1 | 595.3 | 591.9 | 600.7 | 596.0 | 8.8  | 595.0 |
| 37 | $C_2H_5\overset{\text{CH}_3}{\underset{\text{CH}_3}{\text{B}}}-OH$         | 427.5 | 420.5 | 425.7 | 424.6 | 7.0  | 428.9 | 428.1 | 430.8 | 429.3 | 2.7  | 426.9 |
| 38 | $(H_3C)_2HC\overset{\text{CH}_3}{\underset{\text{CH}_3}{\text{B}}}-OH$     | 415.8 | 406.2 | 413.5 | 411.8 | 9.6  | 415.0 | 414.2 | 418.4 | 415.9 | 4.2  | 413.9 |
| 39 | $(H_3C)_3C\overset{\text{CH}_3}{\underset{\text{CH}_3}{\text{B}}}-OH$      | 410.2 | 398.5 | 408.1 | 405.6 | 11.7 | 408.2 | 406.1 | 413.1 | 409.1 | 7.0  | 407.4 |
| 40 | $(H_3C)_2HC\overset{\text{C}_2H_5}{\underset{\text{C}_2H_5}{\text{B}}}-OH$ | 409.6 | 406.4 | 408.1 | 408.0 | 3.2  | 409.0 | 405.0 | 412.0 | 408.7 | 7.0  | 408.4 |
| 41 | $C_3H_7\overset{\text{C}_2H_5}{\underset{\text{C}_2H_5}{\text{B}}}-OH$     | 425.2 | 423.2 | 424.2 | 424.2 | 2.0  | 426.5 | 423.4 | 430.0 | 426.6 | 6.6  | 425.4 |
| 42 | $H_3C-BH_2$                                                                | 434.5 | 436.6 | 434.7 | 435.3 | 2.1  | 441.2 | 440.9 | 440.0 | 440.7 | 1.2  | 438.0 |
| 43 | $C_2H_5-BH_2$                                                              | 423.1 | 422.2 | 422.6 | 422.6 | 0.9  | 427.4 | 427.0 | 427.4 | 427.3 | 0.4  | 425.0 |
| 44 | $(H_3C)_2HC-BH_2$                                                          | 411.6 | 408.3 | 410.7 | 410.2 | 3.3  | 413.8 | 412.2 | 414.7 | 413.6 | 2.5  | 411.9 |
| 45 | $(H_3C)_3C-BH_2$                                                           | 404.3 | 398.6 | 403.0 | 402.0 | 5.7  | 404.9 | 403.6 | 407.7 | 405.4 | 4.1  | 403.7 |
| 46 | $H_3C-BH-OH$                                                               | 440.8 | 439.7 | 440.2 | 440.2 | 1.1  | 445.7 | 445.8 | 445.1 | 445.5 | 0.7  | 442.9 |
| 47 | $H_3CH_2C-BH-OH$                                                           | 426.6 | 422.2 | 425.0 | 424.6 | 4.4  | 428.7 | 428.6 | 429.5 | 428.9 | 0.9  | 426.8 |
| 48 | $(H_3C)_2HC-BH-OH$                                                         | 416.7 | 409.6 | 414.6 | 413.6 | 7.1  | 416.5 | 415.7 | 418.3 | 416.8 | 2.6  | 415.2 |
| 49 | $(H_3C)_3C-BH-OH$                                                          | 412.2 | 402.7 | 410.2 | 408.4 | 9.5  | 411.1 | 409.3 | 414.9 | 411.8 | 5.6  | 410.1 |
| 50 | $H_2C=CH-BH_2$                                                             | 486.1 | 484.3 | 484.5 | 485.0 | 1.8  | 488.7 | 490.2 | 488.7 | 489.2 | 1.5  | 487.1 |
| 51 | $H_2C=C-BH_2$<br>$CH_3$                                                    | 472.6 | 468.8 | 470.7 | 470.7 | 3.8  | 474.2 | 473.3 | 475.3 | 474.3 | 2.0  | 472.5 |
| 52 | $H_3CHC=CH-BH_2$                                                           | 497.3 | 493.8 | 495.5 | 495.5 | 3.5  | 499.6 | 500.6 | 501.5 | 500.6 | 1.9  | 498.1 |
| 53 | $(H_3C)_2C=CH-BH_2$                                                        | 497.4 | 492.6 | 495.8 | 495.3 | 4.8  | 499.5 | 498.6 | 501.8 | 500.0 | 3.2  | 497.6 |
| 54 | $H_3CHC=C-BH_2$<br>$CH_3$                                                  | 472.9 | 467.3 | 470.9 | 470.4 | 5.6  | 474.1 | 472.4 | 476.9 | 474.5 | 4.5  | 472.4 |
| 55 | $H_3CH_2CH_2C-BH_2$                                                        | 427.4 | 425.2 | 427.1 | 426.6 | 2.2  | 431.5 | 431.1 | 432.1 | 431.6 | 1.0  | 429.1 |
| 56 | $H_3C(H_2C)_2H_2C-BH_2$                                                    | 426.9 | 423.7 | 426.8 | 425.8 | 3.2  | 431.1 | 430.2 | 431.8 | 431.0 | 1.6  | 428.4 |
| 57 | $H_3C(H_2C)_3H_2C-BH_2$                                                    | 425.8 | 420.9 | 425.2 | 424.0 | 4.9  | 429.8 | 429.6 | 431.2 | 430.2 | 1.6  | 427.1 |
| 58 | $H_3C(H_2C)_4H_2C-BH_2$                                                    | 425.9 | 419.5 | 425.3 | 423.6 | 6.4  | 429.8 | 429.7 | 430.5 | 430.0 | 0.8  | 426.8 |
| 59 | $H_3CH_2CHC-BH_2$<br>$CH_3$                                                | 412.6 | 408.5 | 412.2 | 411.1 | 4.1  | 415.1 | 412.7 | 415.4 | 414.4 | 2.7  | 412.8 |
| 60 | $H_3CHC-H_2C-BH_2$<br>$CH_3$                                               | 430.2 | 424.9 | 429.5 | 428.2 | 5.3  | 432.3 | 433.4 | 436.5 | 434.1 | 4.2  | 431.1 |
| 61 | $(H_3C)_2HC-HC-BH_2$<br>$CH_3$                                             | 416.9 | 410.6 | 415.7 | 414.4 | 6.3  | 418.6 | 416.8 | 420.8 | 418.7 | 4.0  | 416.6 |
| 62 | $C_2H_5-\overset{CH_3}{\underset{CH_3}{C}}-BH_2$                           | 402.5 | 396.8 | 402.3 | 400.5 | 5.7  | 403.9 | 402.5 | 405.2 | 403.9 | 2.7  | 402.2 |
| 63 | $(H_3C)_3C-H_2C-BH_2$                                                      | 430.1 | 424.9 | 429.6 | 428.2 | 5.2  | 433.7 | 432.9 | 440.4 | 435.7 | 7.5  | 431.9 |
| 64 | $(H_3C)_3C-HC-BH_2$<br>$CH_3$                                              | 411.4 | 403.3 | 410.0 | 408.2 | 8.1  | 412.7 | 410.7 | 416.9 | 413.4 | 6.2  | 410.8 |

**Table S2** The 64 C-B calculated BDEs using 34 kinds of DFTs (kJ/mol)

| Entry | compounds                                                                                                                            | B3LYP | B3LYP-D3 | CAM-B3LYP | B3P86 | KMLYP | MPW1P86 | B3PW91 | B97D  | B97D3 |
|-------|--------------------------------------------------------------------------------------------------------------------------------------|-------|----------|-----------|-------|-------|---------|--------|-------|-------|
| 1     | $\text{CH}_3\text{CH}=\text{CH}-\text{B}(\text{OH})_2$                                                                               | 456.0 | 466.9    | 467.6     | 469.2 | 504.1 | 469.3   | 456.6  | 455.7 | 458.1 |
| 2     | $\text{H}_2\text{C}=\text{CH}-\text{B}(\text{OH})_2$                                                                                 | 450.0 | 459.7    | 461.3     | 462.6 | 496.9 | 462.6   | 450.3  | 447.2 | 450.4 |
| 3     | $\text{H}_2\text{C}=\overset{\text{CH}_3}{\underset{ }{\text{C}}}-\text{B}(\text{OH})_2$                                             | 427.6 | 441.9    | 441.8     | 441.3 | 479.6 | 442.6   | 428.1  | 430.0 | 431.3 |
| 4     | $\text{H}_2\text{C}=\overset{\text{CH}_2\text{CH}_3}{\underset{ }{\text{C}}}-\text{B}(\text{OH})_2$                                  | 426.2 | 443.2    | 441.2     | 440.6 | 480.2 | 442.3   | 427.0  | 432.9 | 433.1 |
| 5     | $\text{H}_3\text{CHC}=\overset{\text{CH}_3}{\underset{ }{\text{C}}}-\text{B}(\text{OH})_2$                                           | 420.2 | 437.7    | 435.3     | 435.3 | 474.2 | 437.0   | 421.6  | 428.6 | 428.2 |
| 6     | $\text{C}_2\text{H}_5\text{HC}=\text{CH}-\text{B}(\text{OH})_2$                                                                      | 455.3 | 466.5    | 467.0     | 468.5 | 503.5 | 468.7   | 456.0  | 455.5 | 457.7 |
| 7     | $\text{H}_2\text{C}=\overset{\text{CH}_3}{\underset{ }{\text{C}}}-\overset{\text{B}-\text{OH}}{\underset{ }{\text{B}}}$              | 439.5 | 449.6    | 450.3     | 452.6 | 484.4 | 452.3   | 440.3  | 440.4 | 442.5 |
| 8     | $\text{H}_3\text{CHC}=\overset{\text{CH}_3}{\underset{ }{\text{C}}}-\overset{\text{B}-\text{OH}}{\underset{ }{\text{B}}}$            | 448.2 | 459.3    | 459.6     | 461.6 | 494.9 | 461.6   | 449.1  | 450.0 | 451.7 |
| 9     | $(\text{H}_3\text{C})_2\text{C}=\overset{\text{CH}_3}{\underset{ }{\text{C}}}-\overset{\text{B}-\text{OH}}{\underset{ }{\text{B}}}$  | 444.0 | 457.4    | 456.1     | 458.6 | 493.3 | 459.1   | 444.9  | 449.0 | 449.1 |
| 10    | $\text{H}_2\text{C}=\overset{\text{CH}_3}{\underset{ }{\text{C}}}-\overset{\text{B}-\text{OH}}{\underset{ }{\text{B}}}$              | 415.4 | 430.8    | 429.4     | 429.5 | 466.2 | 430.9   | 416.1  | 421.8 | 422.2 |
| 11    | $\text{H}_3\text{CHC}=\overset{\text{CH}_3}{\underset{ }{\text{C}}}-\overset{\text{B}-\text{OH}}{\underset{ }{\text{B}}}$            | 414.6 | 432.2    | 429.2     | 430.4 | 468.3 | 431.9   | 416.2  | 425.4 | 424.3 |
| 12    | $\text{H}_2\text{C}=\overset{\text{CH}_2\text{CH}_3}{\underset{ }{\text{C}}}-\overset{\text{B}-\text{OH}}{\underset{ }{\text{B}}}$   | 412.3 | 430.7    | 427.0     | 427.1 | 465.0 | 428.9   | 413.3  | 423.8 | 422.9 |
| 13    | $\text{H}_2\text{C}=\text{CH}-\text{B}(\text{CH}_3)_2$                                                                               | 444.7 | 455.8    | 455.7     | 457.3 | 489.5 | 457.5   | 444.7  | 448.4 | 449.2 |
| 14    | $\text{H}_3\text{CHC}=\text{CH}-\text{B}(\text{CH}_3)_2$                                                                             | 452.7 | 465.1    | 464.0     | 466.1 | 498.7 | 466.4   | 453.2  | 459.2 | 459.1 |
| 15    | $(\text{H}_3\text{C})_2\text{C}=\text{CH}-\text{B}(\text{CH}_3)_2$                                                                   | 441.3 | 456.7    | 453.3     | 456.0 | 489.6 | 456.8   | 442.1  | 453.8 | 451.1 |
| 16    | $\text{H}_2\text{C}=\overset{\text{CH}_3}{\underset{ }{\text{C}}}-\text{B}(\text{CH}_3)_2$                                           | 417.2 | 434.1    | 431.3     | 431.5 | 467.8 | 433.1   | 417.6  | 429.2 | 427.2 |
| 17    | $\text{H}_3\text{CHC}=\overset{\text{CH}_3}{\underset{ }{\text{C}}}-\text{B}(\text{CH}_3)_2$                                         | 416.3 | 435.5    | 431.0     | 432.5 | 469.6 | 434.3   | 417.8  | 433.6 | 429.8 |
| 18    | $\text{H}_2\text{C}=\overset{\text{C}_2\text{H}_5}{\underset{ }{\text{C}}}-\text{B}(\text{CH}_3)_2$                                  | 413.2 | 432.6    | 428.8     | 429.5 | 467.9 | 431.5   | 414.7  | 429.9 | 426.6 |
| 19    | $\text{C}_2\text{H}_5\text{HC}=\text{CH}-\text{B}(\text{CH}_3)_2$                                                                    | 435.2 | 450.9    | 446.8     | 449.0 | 482.1 | 449.7   | 435.6  | 446.9 | 445.7 |
| 20    | $\text{H}_2\text{C}=\overset{\text{C}_2\text{H}_5}{\underset{ }{\text{C}}}-\overset{\text{B}-\text{OH}}{\underset{ }{\text{B}}}$     | 441.5 | 453.5    | 453.4     | 455.3 | 489.2 | 455.5   | 442.6  | 444.8 | 445.5 |
| 21    | $\text{H}_2\text{C}=\overset{\text{CH}(\text{CH}_3)_2}{\underset{ }{\text{C}}}-\overset{\text{B}-\text{OH}}{\underset{ }{\text{B}}}$ | 446.5 | 459.2    | 460.2     | 460.2 | 496.6 | 460.9   | 447.3  | 451.1 | 451.4 |
| 22    | $\text{H}_2\text{C}=\overset{\text{CH}_3}{\underset{ }{\text{C}}}-\overset{\text{B}-\text{OH}}{\underset{ }{\text{B}}}$              | 418.8 | 436.2    | 433.7     | 434.1 | 472.0 | 435.7   | 420.2  | 429.7 | 427.9 |
| 23    | $\text{H}_3\text{CHC}=\overset{\text{C}_2\text{H}_5}{\underset{ }{\text{C}}}-\overset{\text{B}-\text{OH}}{\underset{ }{\text{B}}}$   | 448.2 | 461.4    | 460.5     | 462.7 | 497.2 | 463.0   | 449.7  | 454.0 | 453.9 |
| 24    | $\text{H}_2\text{C}=\text{CH}-\text{B}(\text{C}_2\text{H}_5)_2$                                                                      | 441.4 | 454.3    | 453.3     | 454.2 | 488.0 | 454.7   | 441.4  | 448.5 | 447.2 |
| 25    | $\text{H}_3\text{C}-\text{B}(\text{OH})_2$                                                                                           | 414.0 | 421.3    | 425.3     | 428.0 | 458.4 | 427.2   | 416.3  | 412.5 | 416.4 |
| 26    | $\text{C}_2\text{H}_5-\text{B}(\text{OH})_2$                                                                                         | 390.8 | 402.4    | 404.0     | 404.8 | 438.9 | 405.2   | 393.0  | 391.4 | 393.2 |
| 27    | $(\text{H}_3\text{C})_2\text{HC}-\text{B}(\text{OH})_2$                                                                              | 368.7 | 385.6    | 383.9     | 383.6 | 420.8 | 385.1   | 371.0  | 375.8 | 374.0 |
| 28    | $(\text{H}_3\text{C})_3\text{C}-\text{B}(\text{OH})_2$                                                                               | 350.7 | 372.7    | 368.4     | 366.7 | 407.7 | 369.5   | 353.0  | 364.0 | 359.1 |
| 29    | $\text{C}_3\text{H}_7-\text{B}(\text{OH})_2$                                                                                         | 394.2 | 406.8    | 408.2     | 408.8 | 444.2 | 409.4   | 396.7  | 396.4 | 397.2 |

|    |                                                                |       |       |       |       |       |       |       |       |       |
|----|----------------------------------------------------------------|-------|-------|-------|-------|-------|-------|-------|-------|-------|
| 30 | $C_4H_9-B(OH)_2$                                               | 393.6 | 406.5 | 407.7 | 408.2 | 443.7 | 408.8 | 396.1 | 396.1 | 396.8 |
| 31 | $C_2H_5HC(B(OH)_2)CH_3$                                        | 367.3 | 384.8 | 382.7 | 382.2 | 419.9 | 383.8 | 369.6 | 375.7 | 373.1 |
| 32 | $(H_3C)_2CHCH_2-B(OH)_2$                                       | 391.6 | 406.6 | 405.8 | 406.5 | 442.1 | 407.3 | 394.1 | 398.8 | 397.9 |
| 33 | $H_3C-B(CH_3)_2$                                               | 403.9 | 412.3 | 415.1 | 417.6 | 445.4 | 416.8 | 406.0 | 408.7 | 410.1 |
| 34 | $C_2H_5-B(C_2H_5)_2$                                           | 375.9 | 391.6 | 389.5 | 389.8 | 422.7 | 390.6 | 377.8 | 389.0 | 385.4 |
| 35 | $HC\equiv C-BF_2$                                              | 597.2 | 600.5 | 609.3 | 607.8 | 645.6 | 607.1 | 595.1 | 583.4 | 587.6 |
| 36 | $HC\equiv C-BCl_2$                                             | 583.7 | 589.3 | 595.7 | 596.0 | 630.9 | 595.1 | 583.4 | 567.6 | 575.6 |
| 37 | $C_2H_5\overset{\text{B-OH}}{\underset{CH_3}{\text{C}}}$       | 381.0 | 393.1 | 393.8 | 395.4 | 427.2 | 395.6 | 383.5 | 385.5 | 385.8 |
| 38 | $(H_3C)_2HC\overset{\text{B-OH}}{\underset{CH_3}{\text{C}}}$   | 356.5 | 373.7 | 370.9 | 371.1 | 405.8 | 372.5 | 358.8 | 367.0 | 364.3 |
| 39 | $(H_3C)_3C\overset{\text{B-OH}}{\underset{CH_3}{\text{C}}}$    | 337.3 | 360.8 | 354.9 | 353.6 | 392.9 | 356.5 | 339.7 | 355.9 | 349.7 |
| 40 | $(H_3C)_2HC\overset{\text{B-OH}}{\underset{C_2H_5}{\text{C}}}$ | 355.4 | 375.3 | 371.3 | 371.6 | 408.2 | 373.4 | 358.4 | 371.0 | 365.9 |
| 41 | $C_3H_7\overset{\text{B-OH}}{\underset{C_2H_5}{\text{C}}}$     | 383.0 | 398.3 | 397.5 | 398.9 | 433.2 | 399.6 | 386.4 | 393.5 | 390.7 |
| 42 | $H_3C-BH_2$                                                    | 422.3 | 425.2 | 430.3 | 435.8 | 457.7 | 433.6 | 424.5 | 424.6 | 428.8 |
| 43 | $C_2H_5-BH_2$                                                  | 401.4 | 407.4 | 410.8 | 415.0 | 439.2 | 413.7 | 403.8 | 404.8 | 407.2 |
| 44 | $(H_3C)_2HC-BH_2$                                              | 379.9 | 389.3 | 390.9 | 393.9 | 420.6 | 393.5 | 382.3 | 386.3 | 386.5 |
| 45 | $(H_3C)_3C-BH_2$                                               | 360.9 | 374.4 | 373.7 | 376.0 | 405.2 | 376.6 | 363.4 | 373.5 | 370.6 |
| 46 | $H_3C-BH-OH$                                                   | 419.8 | 424.2 | 429.7 | 433.2 | 459.7 | 431.9 | 421.8 | 418.7 | 423.1 |
| 47 | $H_3CH_2C-BH-OH$                                               | 395.0 | 402.7 | 406.1 | 408.2 | 437.1 | 407.8 | 397.0 | 395.5 | 397.8 |
| 48 | $(H_3C)_2HC-BH-OH$                                             | 373.8 | 385.4 | 386.3 | 387.3 | 418.4 | 387.8 | 375.6 | 378.5 | 378.3 |
| 49 | $(H_3C)_3C-BH-OH$                                              | 357.4 | 373.8 | 372.7 | 372.1 | 407.6 | 374.0 | 359.2 | 367.1 | 364.3 |
| 50 | $H_2C=CH-BH_2$                                                 | 469.5 | 474.1 | 476.5 | 481.0 | 506.4 | 479.7 | 469.1 | 468.8 | 472.5 |
| 51 | $H_2C=C(BH_2)CH_3$                                             | 446.6 | 454.4 | 455.6 | 459.0 | 486.5 | 458.5 | 446.5 | 450.0 | 452.3 |
| 52 | $H_3CHC=CH-BH_2$                                               | 481.6 | 487.2 | 488.7 | 494.0 | 519.5 | 492.7 | 481.8 | 483.3 | 486.3 |
| 53 | $(H_3C)_2C=CH-BH_2$                                            | 480.9 | 487.8 | 488.4 | 494.7 | 520.6 | 493.5 | 481.7 | 486.2 | 487.1 |
| 54 | $H_3CHC=C(BH_2)CH_3$                                           | 446.1 | 455.7 | 455.2 | 459.9 | 487.5 | 459.5 | 446.7 | 454.7 | 455.0 |
| 55 | $H_3CH_2CH_2C-BH_2$                                            | 404.9 | 411.7 | 415.1 | 419.0 | 444.6 | 417.9 | 407.5 | 409.5 | 411.1 |
| 56 | $H_3C(H_2C)_2H_2C-BH_2$                                        | 404.4 | 411.4 | 414.7 | 418.5 | 444.2 | 417.4 | 407.1 | 409.2 | 410.6 |
| 57 | $H_3C(H_2C)_3H_2C-BH_2$                                        | 402.8 | 409.7 | 412.5 | 416.5 | 441.3 | 415.3 | 405.2 | 408.0 | 409.5 |
| 58 | $H_3C(H_2C)_4H_2C-BH_2$                                        | 402.7 | 409.7 | 412.4 | 416.5 | 441.3 | 415.3 | 405.1 | 408.0 | 409.5 |
| 59 | $H_3CH_2CHC(BH_2)CH_3$                                         | 380.0 | 390.6 | 392.0 | 394.9 | 423.1 | 394.8 | 382.8 | 388.7 | 387.3 |
| 60 | $H_3CHC(H_2C)C(BH_2)CH_3$                                      | 403.3 | 411.8 | 413.6 | 417.8 | 443.5 | 416.8 | 406.1 | 411.8 | 412.1 |
| 61 | $(H_3C)_2HC-CH(BH_2)CH_3$                                      | 381.1 | 392.3 | 392.7 | 396.3 | 424.3 | 396.4 | 384.1 | 393.3 | 390.3 |

|    |                                                                                                                  |       |       |       |       |       |       |       |       |       |
|----|------------------------------------------------------------------------------------------------------------------|-------|-------|-------|-------|-------|-------|-------|-------|-------|
| 62 | $\begin{array}{c} \text{CH}_3 \\   \\ \text{C}_2\text{H}_5-\text{C}-\text{BH}_2 \\   \\ \text{CH}_3 \end{array}$ | 357.3 | 372.6 | 370.6 | 373.2 | 403.0 | 374.0 | 360.3 | 373.4 | 369.3 |
| 63 | $(\text{H}_3\text{C})_3\text{C}-\text{H}_2\text{C}-\text{BH}_2$                                                  | 402.6 | 412.9 | 413.9 | 418.0 | 445.3 | 417.4 | 405.7 | 414.2 | 412.6 |
| 64 | $\begin{array}{c} (\text{H}_3\text{C})_3\text{C}-\text{HC}-\text{BH}_2 \\   \\ \text{CH}_3 \end{array}$          | 372.5 | 386.2 | 384.7 | 388.8 | 417.6 | 389.0 | 375.9 | 389.9 | 384.6 |

| Entry | compounds                                                                                                                        | BB1K  | BMK   | BP86  | BP86-D3 | M05   | M05-2X | M06   | M06-2X | M06-HF |
|-------|----------------------------------------------------------------------------------------------------------------------------------|-------|-------|-------|---------|-------|--------|-------|--------|--------|
| 1     | $\text{CH}_3\text{CH}=\text{CH}-\text{B}(\text{OH})_2$                                                                           | 477.8 | 488.4 | 454.3 | 466.6   | 469.5 | 494.0  | 477.4 | 475.4  | 481.6  |
| 2     | $\text{H}_2\text{C}=\text{CH}-\text{B}(\text{OH})_2$                                                                             | 471.0 | 481.9 | 447.8 | 458.8   | 463.2 | 486.9  | 470.0 | 468.7  | 476.3  |
| 3     | $\begin{array}{c} \text{H}_2\text{C}=\text{C}-\text{B}(\text{OH})_2 \\   \\ \text{CH}_3 \end{array}$                             | 451.5 | 463.7 | 424.5 | 440.7   | 440.3 | 473.0  | 453.5 | 455.2  | 470.5  |
| 4     | $\begin{array}{c} \text{H}_2\text{C}=\text{C}-\text{B}(\text{OH})_2 \\   \\ \text{CH}_2\text{CH}_3 \end{array}$                  | 451.6 | 464.0 | 423.3 | 442.5   | 440.4 | 474.6  | 455.5 | 456.7  | 472.5  |
| 5     | $\begin{array}{c} \text{H}_3\text{CHC}=\text{C}-\text{B}(\text{OH})_2 \\   \\ \text{CH}_3 \end{array}$                           | 446.0 | 457.9 | 418.5 | 438.4   | 434.4 | 468.8  | 448.6 | 451.0  | 465.6  |
| 6     | $\text{C}_2\text{H}_5\text{HC}=\text{CH}-\text{B}(\text{OH})_2$                                                                  | 477.1 | 487.7 | 453.4 | 466.1   | 468.8 | 493.4  | 476.8 | 474.8  | 481.1  |
| 7     | $\begin{array}{c} \text{H}_2\text{C}=\text{CH}-\text{B}-\text{OH} \\   \\ \text{CH}_3 \end{array}$                               | 459.6 | 471.1 | 439.0 | 450.7   | 451.4 | 475.1  | 459.0 | 460.4  | 469.9  |
| 8     | $\begin{array}{c} \text{H}_3\text{CHC}=\text{CH}-\text{B}-\text{OH} \\   \\ \text{CH}_3 \end{array}$                             | 469.1 | 480.8 | 447.5 | 460.2   | 460.2 | 485.0  | 469.2 | 469.5  | 477.8  |
| 9     | $\begin{array}{c} (\text{H}_3\text{C})_2\text{C}=\text{CH}-\text{B}-\text{OH} \\   \\ \text{CH}_3 \end{array}$                   | 465.6 | 476.6 | 444.7 | 459.8   | 456.3 | 481.2  | 467.7 | 466.2  | 471.1  |
| 10    | $\begin{array}{c} \text{CH}_3 \\   \\ \text{H}_2\text{C}=\text{C}-\text{B}-\text{OH} \\   \\ \text{CH}_3 \end{array}$            | 438.8 | 452.1 | 413.6 | 431.3   | 426.9 | 460.4  | 442.0 | 445.9  | 463.4  |
| 11    | $\begin{array}{c} \text{CH}_3 \\   \\ \text{H}_3\text{CHC}=\text{C}-\text{B}-\text{OH} \\   \\ \text{CH}_3 \end{array}$          | 440.3 | 453.3 | 414.2 | 434.2   | 426.9 | 461.5  | 444.1 | 447.0  | 461.6  |
| 12    | $\begin{array}{c} \text{CH}_2\text{CH}_3 \\   \\ \text{H}_2\text{C}=\text{C}-\text{B}-\text{OH} \\   \\ \text{CH}_3 \end{array}$ | 437.3 | 450.7 | 410.9 | 432.0   | 425.3 | 460.3  | 442.8 | 446.0  | 463.5  |
| 13    | $\text{H}_2\text{C}=\text{CH}-\text{B}(\text{CH}_3)_2$                                                                           | 464.3 | 477.7 | 444.0 | 456.8   | 454.0 | 481.2  | 463.4 | 467.4  | 480.7  |
| 14    | $\text{H}_3\text{CHC}=\text{CH}-\text{B}(\text{CH}_3)_2$                                                                         | 473.1 | 486.4 | 452.9 | 467.1   | 461.9 | 490.1  | 472.8 | 475.8  | 487.2  |
| 15    | $(\text{H}_3\text{C})_2\text{C}=\text{CH}-\text{B}(\text{CH}_3)_2$                                                               | 463.2 | 475.6 | 443.2 | 460.7   | 451.4 | 480.7  | 465.6 | 467.3  | 475.2  |
| 16    | $\begin{array}{c} \text{H}_2\text{C}=\text{C}-\text{B}(\text{CH}_3)_2 \\   \\ \text{CH}_3 \end{array}$                           | 440.5 | 455.7 | 416.3 | 435.7   | 426.0 | 463.5  | 443.5 | 450.3  | 470.8  |
| 17    | $\begin{array}{c} \text{H}_3\text{CHC}=\text{C}-\text{B}(\text{CH}_3)_2 \\   \\ \text{CH}_3 \end{array}$                         | 442.0 | 456.4 | 417.4 | 439.2   | 425.5 | 464.3  | 445.6 | 451.0  | 468.7  |
| 18    | $\begin{array}{c} \text{H}_2\text{C}=\text{C}-\text{B}(\text{CH}_3)_2 \\   \\ \text{C}_2\text{H}_5 \end{array}$                  | 440.1 | 454.0 | 413.5 | 435.7   | 423.1 | 463.5  | 444.6 | 450.8  | 469.2  |
| 19    | $\text{C}_2\text{H}_5\text{HC}=\text{CH}-\text{B}(\text{CH}_3)_2$                                                                | 456.1 | 469.7 | 435.8 | 453.9   | 446.5 | 474.6  | 458.8 | 461.7  | 473.0  |
| 20    | $\begin{array}{c} \text{H}_2\text{C}=\text{CH}-\text{B}-\text{OH} \\   \\ \text{C}_2\text{H}_5 \end{array}$                      | 463.5 | 475.3 | 440.9 | 454.6   | 453.7 | 479.9  | 464.6 | 464.8  | 474.0  |

|    |                                                                                                                       |       |       |       |       |       |       |       |       |       |
|----|-----------------------------------------------------------------------------------------------------------------------|-------|-------|-------|-------|-------|-------|-------|-------|-------|
| 21 | $\text{H}_2\text{C}=\overset{\text{CH}_3}{\underset{\text{CH}(\text{CH}_3)_2}{\text{C}}}-\text{B}(\text{OH})_2$       | 470.2 | 482.0 | 444.3 | 459.0 | 461.5 | 488.4 | 471.5 | 469.8 | 477.0 |
| 22 | $\text{H}_2\text{C}=\overset{\text{CH}_3}{\underset{\text{C}_2\text{H}_5}{\text{C}}}-\text{B}(\text{OH})_2$           | 444.4 | 457.9 | 417.9 | 437.8 | 429.9 | 466.8 | 448.9 | 452.2 | 468.9 |
| 23 | $\text{H}_3\text{C}-\text{CH}=\overset{\text{CH}_3}{\underset{\text{C}_2\text{H}_5}{\text{C}}}-\text{B}(\text{OH})_2$ | 471.0 | 482.8 | 448.2 | 463.2 | 460.5 | 487.6 | 472.7 | 472.0 | 479.3 |
| 24 | $\text{H}_2\text{C}=\text{CH}-\text{B}(\text{C}_2\text{H}_5)_2$                                                       | 462.4 | 476.4 | 440.1 | 454.7 | 451.9 | 481.7 | 464.6 | 467.8 | 484.4 |
| 25 | $\text{H}_3\text{C}-\text{B}(\text{OH})_2$                                                                            | 437.2 | 444.8 | 416.4 | 424.9 | 432.7 | 448.1 | 439.3 | 434.3 | 431.5 |
| 26 | $\text{C}_2\text{H}_5-\text{B}(\text{OH})_2$                                                                          | 415.7 | 425.6 | 390.8 | 404.2 | 408.4 | 430.8 | 419.0 | 417.6 | 424.4 |
| 27 | $(\text{H}_3\text{C})_2\text{HC}-\text{B}(\text{OH})_2$                                                               | 396.2 | 408.5 | 368.0 | 387.0 | 385.0 | 416.9 | 399.8 | 403.1 | 420.1 |
| 28 | $(\text{H}_3\text{C})_3\text{C}-\text{B}(\text{OH})_2$                                                                | 381.1 | 396.4 | 349.4 | 374.3 | 366.5 | 409.0 | 387.8 | 393.8 | 420.4 |
| 29 | $\text{C}_3\text{H}_7-\text{B}(\text{OH})_2$                                                                          | 420.0 | 429.4 | 394.3 | 408.8 | 412.5 | 435.0 | 424.9 | 421.4 | 425.6 |
| 30 | $\text{C}_4\text{H}_9-\text{B}(\text{OH})_2$                                                                          | 419.5 | 428.5 | 393.6 | 408.3 | 411.9 | 434.3 | 424.2 | 420.8 | 424.9 |
| 31 | $\text{C}_2\text{H}_5\text{HC}-\overset{\text{CH}_3}{\text{B}(\text{OH})_2}$                                          | 394.6 | 407.2 | 366.5 | 386.3 | 384.2 | 415.3 | 400.1 | 401.6 | 417.1 |
| 32 | $(\text{H}_3\text{C})_2\text{CHCH}_2-\text{B}(\text{OH})_2$                                                           | 418.3 | 427.8 | 392.0 | 409.1 | 410.7 | 434.8 | 424.3 | 421.1 | 426.8 |
| 33 | $\text{H}_3\text{C}-\text{B}(\text{CH}_3)_2$                                                                          | 425.1 | 435.2 | 407.9 | 418.0 | 419.9 | 436.8 | 427.8 | 428.1 | 428.6 |
| 34 | $\text{C}_2\text{H}_5-\text{B}(\text{C}_2\text{H}_5)_2$                                                               | 400.1 | 414.5 | 377.0 | 395.3 | 392.3 | 419.8 | 408.0 | 411.3 | 427.5 |
| 35 | $\text{HC}\equiv\text{C}-\text{BF}_2$                                                                                 | 614.8 | 625.4 | 590.5 | 594.2 | 606.6 | 631.8 | 602.3 | 598.6 | 603.1 |
| 36 | $\text{HC}\equiv\text{C}-\text{BCl}_2$                                                                                | 601.1 | 612.4 | 580.6 | 586.9 | 585.2 | 612.5 | 589.2 | 588.2 | 601.5 |
| 37 | $\text{C}_2\text{H}_5-\overset{\text{CH}_3}{\text{B}(\text{OH})_2}$                                                   | 404.9 | 415.6 | 382.7 | 396.8 | 397.1 | 419.2 | 408.9 | 409.8 | 417.2 |
| 38 | $(\text{H}_3\text{C})_2\text{HC}-\overset{\text{CH}_3}{\text{B}(\text{OH})_2}$                                        | 382.0 | 396.1 | 356.9 | 376.6 | 371.9 | 402.9 | 387.9 | 392.8 | 411.8 |
| 39 | $(\text{H}_3\text{C})_3\text{C}-\overset{\text{CH}_3}{\text{B}(\text{OH})_2}$                                         | 367.0 | 383.4 | 337.5 | 364.4 | 352.5 | 395.4 | 377.2 | 384.3 | 412.1 |
| 40 | $(\text{H}_3\text{C})_2\text{HC}-\overset{\text{C}_2\text{H}_5}{\text{B}(\text{OH})_2}$                               | 384.0 | 397.8 | 356.7 | 379.5 | 370.8 | 405.3 | 391.4 | 395.4 | 411.9 |
| 41 | $\text{C}_3\text{H}_7-\overset{\text{C}_2\text{H}_5}{\text{B}(\text{OH})_2}$                                          | 409.8 | 420.1 | 385.4 | 402.9 | 399.8 | 424.7 | 416.8 | 414.8 | 418.6 |
| 42 | $\text{H}_3\text{C}-\text{BH}_2$                                                                                      | 440.3 | 449.3 | 429.9 | 433.4 | 440.9 | 448.3 | 443.8 | 438.8 | 431.0 |
| 43 | $\text{C}_2\text{H}_5-\text{BH}_2$                                                                                    | 420.4 | 431.3 | 407.4 | 414.3 | 418.4 | 431.4 | 423.7 | 422.3 | 422.7 |
| 44 | $(\text{H}_3\text{C})_2\text{HC}-\text{BH}_2$                                                                         | 400.6 | 414.4 | 384.9 | 395.6 | 394.6 | 416.2 | 404.2 | 406.6 | 416.9 |
| 45 | $(\text{H}_3\text{C})_3\text{C}-\text{BH}_2$                                                                          | 383.8 | 401.6 | 365.7 | 381.2 | 375.8 | 407.8 | 390.9 | 396.2 | 418.2 |
| 46 | $\text{H}_3\text{C}-\text{BH}-\text{OH}$                                                                              | 440.3 | 448.2 | 423.9 | 429.0 | 438.9 | 449.1 | 441.6 | 436.4 | 432.0 |
| 47 | $\text{H}_3\text{CH}_2\text{C}-\text{BH}-\text{OH}$                                                                   | 416.5 | 426.9 | 397.1 | 405.9 | 412.7 | 428.8 | 417.4 | 416.5 | 421.8 |
| 48 | $(\text{H}_3\text{C})_2\text{HC}-\text{BH}-\text{OH}$                                                                 | 396.5 | 409.9 | 374.8 | 387.9 | 390.2 | 414.5 | 397.9 | 401.4 | 417.4 |
| 49 | $(\text{H}_3\text{C})_3\text{C}-\text{BH}-\text{OH}$                                                                  | 383.3 | 399.5 | 357.6 | 376.4 | 373.4 | 408.5 | 388.7 | 394.2 | 419.4 |
| 50 | $\text{H}_2\text{C}=\text{CH}-\text{BH}_2$                                                                            | 484.5 | 497.1 | 472.0 | 477.2 | 479.7 | 497.6 | 483.3 | 482.1 | 487.8 |
| 51 | $\text{H}_2\text{C}=\overset{\text{CH}_3}{\text{C}}-\text{BH}_2$                                                      | 463.2 | 477.6 | 448.8 | 457.6 | 455.6 | 480.8 | 464.0 | 465.7 | 478.6 |
| 52 | $\text{H}_3\text{C}-\text{CH}=\text{CH}-\text{BH}_2$                                                                  | 497.2 | 509.6 | 485.4 | 491.7 | 491.5 | 509.7 | 496.5 | 493.9 | 496.1 |

|    |                                                                                            |       |       |       |       |       |       |       |       |       |
|----|--------------------------------------------------------------------------------------------|-------|-------|-------|-------|-------|-------|-------|-------|-------|
| 53 | $(\text{H}_3\text{C})_2\text{C}=\text{CH}-\text{BH}_2$                                     | 497.8 | 509.0 | 486.5 | 494.1 | 490.8 | 509.1 | 498.7 | 493.7 | 491.1 |
| 54 | $\text{H}_3\text{CHC}=\underset{\text{CH}_3}{\text{C}}-\text{BH}_2$                        | 463.9 | 478.3 | 450.4 | 461.2 | 455.3 | 481.0 | 466.7 | 466.2 | 474.0 |
| 55 | $\text{H}_3\text{CH}_2\text{CH}_2\text{C}-\text{BH}_2$                                     | 424.6 | 435.3 | 410.9 | 418.8 | 422.5 | 435.6 | 429.7 | 426.2 | 423.9 |
| 56 | $\text{H}_3\text{C}(\text{H}_2\text{C})_2\text{H}_2\text{C}-\text{BH}_2$                   | 424.2 | 434.6 | 410.3 | 418.3 | 422.1 | 435.1 | 429.2 | 425.7 | 423.2 |
| 57 | $\text{H}_3\text{C}(\text{H}_2\text{C})_3\text{H}_2\text{C}-\text{BH}_2$                   | 422.0 | 433.4 | 408.7 | 416.7 | 420.2 | 433.5 | 426.5 | 424.2 | 423.8 |
| 58 | $\text{H}_3\text{C}(\text{H}_2\text{C})_4\text{H}_2\text{C}-\text{BH}_2$                   | 422.0 | 433.3 | 408.7 | 416.7 | 420.2 | 433.5 | 426.5 | 424.2 | 423.5 |
| 59 | $\text{H}_3\text{CH}_2\text{CHC}-\underset{\text{CH}_3}{\text{BH}_2}$                      | 402.2 | 415.4 | 385.4 | 397.4 | 395.2 | 417.7 | 407.0 | 408.0 | 415.3 |
| 60 | $\text{H}_3\text{CHC}-\underset{\text{CH}_3}{\text{H}_2\text{C}}-\text{BH}_2$              | 423.7 | 435.1 | 409.7 | 419.5 | 421.5 | 436.3 | 430.5 | 426.7 | 425.6 |
| 61 | $(\text{H}_3\text{C})_2\text{HC}-\underset{\text{CH}_3}{\text{HC}}-\text{BH}_2$            | 403.4 | 417.1 | 387.2 | 399.9 | 397.3 | 421.7 | 409.6 | 410.8 | 421.7 |
| 62 | $\text{C}_2\text{H}_5-\underset{\text{CH}_3}{\overset{\text{CH}_3}{\text{C}}}-\text{BH}_2$ | 381.7 | 399.0 | 362.7 | 380.3 | 373.0 | 406.2 | 390.8 | 394.6 | 415.5 |
| 63 | $(\text{H}_3\text{C})_3\text{C}-\text{H}_2\text{C}-\text{BH}_2$                            | 425.1 | 435.7 | 409.4 | 421.2 | 421.2 | 437.6 | 433.3 | 427.7 | 423.7 |
| 64 | $(\text{H}_3\text{C})_3\text{C}-\underset{\text{CH}_3}{\text{HC}}-\text{BH}_2$             | 397.3 | 411.0 | 379.3 | 394.9 | 389.1 | 415.4 | 404.8 | 404.8 | 413.3 |

| Entry | compounds                                                                                                                                     | M06-L | MPW1B95 | MPW1K | MPW1KCIS | M11   | M11-L | N12   | N12-SX | MN12-L |
|-------|-----------------------------------------------------------------------------------------------------------------------------------------------|-------|---------|-------|----------|-------|-------|-------|--------|--------|
| 1     | $\text{CH}_3\text{CH}=\text{CH}-\text{B}(\text{OH})_2$                                                                                        | 468.6 | 479.0   | 464.7 | 460.2    | 470.2 | 461.6 | 469.3 | 481.7  | 482.3  |
| 2     | $\text{H}_2\text{C}=\text{CH}-\text{B}(\text{OH})_2$                                                                                          | 460.9 | 472.1   | 458.1 | 453.6    | 463.5 | 453.2 | 462.7 | 474.6  | 474.2  |
| 3     | $\text{H}_2\text{C}=\underset{\text{CH}_3}{\text{C}}-\text{B}(\text{OH})_2$                                                                   | 440.3 | 452.3   | 438.6 | 430.4    | 446.9 | 430.7 | 438.8 | 453.5  | 454.0  |
| 4     | $\text{H}_2\text{C}=\underset{\text{CH}_2\text{CH}_3}{\text{C}}-\text{B}(\text{OH})_2$                                                        | 441.5 | 452.5   | 438.2 | 429.4    | 448.8 | 431.2 | 437.2 | 453.4  | 455.7  |
| 5     | $\text{H}_3\text{CHC}=\underset{\text{CH}_3}{\text{C}}-\text{B}(\text{OH})_2$                                                                 | 435.9 | 447.2   | 432.4 | 424.3    | 443.1 | 425.5 | 432.3 | 448.1  | 449.1  |
| 6     | $\text{C}_2\text{H}_5\text{HC}=\text{CH}-\text{B}(\text{OH})_2$                                                                               | 467.8 | 478.3   | 464.1 | 459.5    | 469.6 | 460.5 | 468.6 | 481.1  | 481.4  |
| 7     | $\text{H}_2\text{C}=\text{CH}-\underset{\text{CH}_3}{\overset{\text{B}-\text{OH}}{\text{C}}}$                                                 | 449.8 | 461.4   | 446.8 | 444.4    | 453.4 | 441.9 | 453.5 | 463.6  | 464.3  |
| 8     | $\text{H}_3\text{CHC}=\text{CH}-\underset{\text{CH}_3}{\overset{\text{B}-\text{OH}}{\text{C}}}$                                               | 459.6 | 470.9   | 456.3 | 453.3    | 462.9 | 451.9 | 462.4 | 473.7  | 474.9  |
| 9     | $(\text{H}_3\text{C})_2\text{C}=\text{CH}-\underset{\text{CH}_3}{\overset{\text{B}-\text{OH}}{\text{C}}}$                                     | 458.5 | 468.1   | 452.3 | 449.8    | 460.6 | 451.1 | 459.7 | 470.6  | 473.9  |
| 10    | $\text{H}_2\text{C}=\underset{\text{CH}_3}{\overset{\text{CH}_3}{\text{C}}}-\underset{\text{CH}_3}{\overset{\text{B}-\text{OH}}{\text{C}}}$   | 428.0 | 440.3   | 425.8 | 419.2    | 436.3 | 417.9 | 427.1 | 441.2  | 443.5  |
| 11    | $\text{H}_3\text{CHC}=\underset{\text{CH}_3}{\overset{\text{CH}_3}{\text{C}}}-\underset{\text{CH}_3}{\overset{\text{B}-\text{OH}}{\text{C}}}$ | 432.3 | 442.1   | 426.2 | 419.3    | 438.7 | 419.4 | 427.8 | 443.0  | 447.4  |

|    |                                                                                                                                  |       |       |       |       |       |       |       |       |       |
|----|----------------------------------------------------------------------------------------------------------------------------------|-------|-------|-------|-------|-------|-------|-------|-------|-------|
| 12 | $\begin{array}{c} \text{CH}_2\text{CH}_3 \\   \\ \text{H}_2\text{C}=\text{C}-\text{B}-\text{OH} \\   \\ \text{CH}_3 \end{array}$ | 427.8 | 439.0 | 423.5 | 416.4 | 436.6 | 417.3 | 424.2 | 439.4 | 444.1 |
| 13 | $\text{H}_2\text{C}=\text{CH}-\text{B}(\text{CH}_3)_2$                                                                           | 451.5 | 466.6 | 451.2 | 448.9 | 460.1 | 444.8 | 458.9 | 468.6 | 468.7 |
| 14 | $\text{H}_3\text{CCH}=\text{CH}-\text{B}(\text{CH}_3)_2$                                                                         | 461.3 | 475.7 | 459.7 | 457.7 | 468.4 | 455.2 | 467.7 | 477.7 | 479.2 |
| 15 | $(\text{H}_3\text{C})_2\text{C}=\text{CH}-\text{B}(\text{CH}_3)_2$                                                               | 454.5 | 466.5 | 448.7 | 447.4 | 461.0 | 449.2 | 457.7 | 467.5 | 473.0 |
| 16 | $\begin{array}{c} \text{H}_2\text{C}=\text{C}-\text{B}(\text{CH}_3)_2 \\   \\ \text{CH}_3 \end{array}$                           | 427.5 | 442.7 | 426.8 | 420.8 | 440.1 | 418.6 | 429.4 | 442.8 | 445.7 |
| 17 | $\begin{array}{c} \text{H}_3\text{CCH}=\text{C}-\text{B}(\text{CH}_3)_2 \\   \\ \text{CH}_3 \end{array}$                         | 432.0 | 444.6 | 427.1 | 421.1 | 442.0 | 420.1 | 430.4 | 444.3 | 449.6 |
| 18 | $\begin{array}{c} \text{H}_2\text{C}=\text{C}-\text{B}(\text{CH}_3)_2 \\   \\ \text{C}_2\text{H}_5 \end{array}$                  | 429.9 | 442.3 | 424.8 | 417.7 | 442.3 | 418.7 | 426.6 | 441.4 | 448.6 |
| 19 | $\text{C}_2\text{H}_5\text{HC}=\text{CH}-\text{B}(\text{CH}_3)_2$                                                                | 447.8 | 459.1 | 442.3 | 440.5 | 454.4 | 439.3 | 450.2 | 461.1 | 463.6 |
| 20 | $\begin{array}{c} \text{H}_2\text{C}=\text{CH}-\text{B}-\text{OH} \\   \\ \text{C}_2\text{H}_5 \end{array}$                      | 455.5 | 465.3 | 450.2 | 446.3 | 459.4 | 444.1 | 455.3 | 467.4 | 470.0 |
| 21 | $\begin{array}{c} \text{H}_2\text{C}=\text{CH}-\text{B}-\text{OH} \\   \\ \text{CH}(\text{CH}_3)_2 \end{array}$                  | 462.0 | 471.6 | 456.2 | 450.5 | 469.2 | 449.8 | 459.9 | 474.4 | 476.1 |
| 22 | $\begin{array}{c} \text{CH}_3 \\   \\ \text{H}_2\text{C}=\text{C}-\text{B}-\text{OH} \\   \\ \text{C}_2\text{H}_5 \end{array}$   | 436.4 | 446.0 | 430.4 | 422.8 | 443.4 | 422.6 | 430.5 | 446.0 | 451.8 |
| 23 | $\begin{array}{c} \text{H}_3\text{CCH}=\text{CH}-\text{B}-\text{OH} \\   \\ \text{C}_2\text{H}_5 \end{array}$                    | 464.1 | 472.9 | 457.4 | 453.6 | 466.6 | 453.3 | 462.4 | 475.3 | 478.9 |
| 24 | $\text{H}_2\text{C}=\text{CH}-\text{B}(\text{C}_2\text{H}_5)_2$                                                                  | 450.3 | 464.5 | 448.9 | 445.2 | 460.8 | 443.0 | 456.4 | 466.0 | 466.7 |
| 25 | $\text{H}_3\text{C}-\text{B}(\text{OH})_2$                                                                                       | 433.0 | 439.5 | 421.2 | 423.5 | 433.2 | 431.6 | 430.3 | 441.3 | 446.0 |
| 26 | $\text{C}_2\text{H}_5-\text{B}(\text{OH})_2$                                                                                     | 408.5 | 417.2 | 400.8 | 398.3 | 414.1 | 404.7 | 406.0 | 418.4 | 422.2 |
| 27 | $(\text{H}_3\text{C})_2\text{HC}-\text{B}(\text{OH})_2$                                                                          | 385.2 | 397.3 | 381.2 | 374.8 | 397.1 | 379.8 | 382.8 | 396.9 | 400.7 |
| 28 | $(\text{H}_3\text{C})_3\text{C}-\text{B}(\text{OH})_2$                                                                           | 367.8 | 382.0 | 365.6 | 355.4 | 386.1 | 361.1 | 362.6 | 379.8 | 385.9 |
| 29 | $\text{C}_3\text{H}_7-\text{B}(\text{OH})_2$                                                                                     | 413.7 | 421.4 | 405.0 | 402.2 | 418.7 | 410.8 | 409.5 | 422.6 | 427.5 |
| 30 | $\text{C}_4\text{H}_9-\text{B}(\text{OH})_2$                                                                                     | 412.9 | 420.9 | 404.6 | 401.7 | 418.2 | 410.5 | 409.2 | 422.1 | 427.0 |
| 31 | $\begin{array}{c} \text{C}_2\text{H}_5\text{HC}-\text{B}(\text{OH})_2 \\   \\ \text{CH}_3 \end{array}$                           | 384.9 | 395.8 | 379.8 | 373.5 | 395.9 | 379.0 | 381.5 | 395.6 | 399.5 |
| 32 | $(\text{H}_3\text{C})_2\text{CHCH}_2-\text{B}(\text{OH})_2$                                                                      | 412.6 | 420.0 | 402.7 | 399.5 | 418.6 | 408.9 | 407.5 | 420.9 | 427.4 |
| 33 | $\text{H}_3\text{C}-\text{B}(\text{CH}_3)_2$                                                                                     | 420.0 | 428.7 | 409.2 | 414.4 | 425.2 | 419.6 | 422.2 | 430.8 | 435.4 |
| 34 | $\text{C}_2\text{H}_5-\text{B}(\text{C}_2\text{H}_5)_2$                                                                          | 392.1 | 402.8 | 384.9 | 383.8 | 405.3 | 388.5 | 393.3 | 403.6 | 407.4 |
| 35 | $\text{HC}\equiv\text{C}-\text{BF}_2$                                                                                            | 642.4 | 615.3 | 602.6 | 597.6 | 603.1 | 585.2 | 610.5 | 621.1 | 613.9 |
| 36 | $\text{HC}\equiv\text{C}-\text{BCl}_2$                                                                                           | 628.2 | 602.6 | 589.4 | 586.4 | 587.8 | 567.0 | 599.0 | 605.9 | 604.9 |
| 37 | $\begin{array}{c} \text{C}_2\text{H}_5-\text{B}-\text{OH} \\   \\ \text{CH}_3 \end{array}$                                       | 398.6 | 407.2 | 390.1 | 389.7 | 404.2 | 394.7 | 397.5 | 408.2 | 413.8 |
| 38 | $\begin{array}{c} (\text{H}_3\text{C})_2\text{HC}-\text{B}-\text{OH} \\   \\ \text{CH}_3 \end{array}$                            | 372.5 | 383.9 | 367.5 | 363.3 | 384.1 | 365.9 | 371.5 | 383.7 | 388.0 |
| 39 | $\begin{array}{c} (\text{H}_3\text{C})_3\text{C}-\text{B}-\text{OH} \\   \\ \text{CH}_3 \end{array}$                             | 356.5 | 368.8 | 351.3 | 343.0 | 374.8 | 348.7 | 350.4 | 365.9 | 376.1 |
| 40 | $\begin{array}{c} (\text{H}_3\text{C})_2\text{HC}-\text{B}-\text{OH} \\   \\ \text{C}_2\text{H}_5 \end{array}$                   | 378.0 | 386.1 | 368.1 | 362.5 | 388.7 | 368.3 | 370.1 | 384.7 | 394.2 |
| 41 | $\begin{array}{c} \text{C}_3\text{H}_7-\text{B}-\text{OH} \\   \\ \text{C}_2\text{H}_5 \end{array}$                              | 407.2 | 412.2 | 394.0 | 392.3 | 411.4 | 400.2 | 399.4 | 412.6 | 421.9 |
| 42 | $\text{H}_3\text{C}-\text{BH}_2$                                                                                                 | 438.3 | 445.4 | 423.6 | 435.6 | 440.5 | 440.6 | 444.1 | 448.1 | 457.6 |
| 43 | $\text{C}_2\text{H}_5-\text{BH}_2$                                                                                               | 414.3 | 424.7 | 404.9 | 413.3 | 421.0 | 416.3 | 422.4 | 426.8 | 434.3 |



|    |                                                                                                                  |       |       |       |       |       |       |       |       |       |
|----|------------------------------------------------------------------------------------------------------------------|-------|-------|-------|-------|-------|-------|-------|-------|-------|
| 44 | $(\text{H}_3\text{C})_2\text{HC}-\text{BH}_2$                                                                    | 390.7 | 404.4 | 385.4 | 390.2 | 402.6 | 391.2 | 399.1 | 404.9 | 412.1 |
| 45 | $(\text{H}_3\text{C})_3\text{C}-\text{BH}_2$                                                                     | 370.8 | 387.4 | 368.4 | 369.8 | 389.8 | 369.0 | 378.6 | 386.7 | 393.6 |
| 46 | $\text{H}_3\text{C}-\text{BH}-\text{OH}$                                                                         | 435.8 | 443.8 | 424.3 | 430.5 | 437.4 | 436.0 | 439.3 | 446.3 | 452.7 |
| 47 | $\text{H}_3\text{CH}_2\text{C}-\text{BH}-\text{OH}$                                                              | 407.8 | 419.1 | 401.8 | 403.8 | 414.4 | 406.5 | 413.3 | 421.2 | 424.9 |
| 48 | $(\text{H}_3\text{C})_2\text{HC}-\text{BH}-\text{OH}$                                                            | 383.7 | 398.7 | 382.3 | 380.9 | 396.1 | 380.9 | 390.9 | 399.7 | 401.5 |
| 49 | $(\text{H}_3\text{C})_3\text{C}-\text{BH}-\text{OH}$                                                             | 368.8 | 385.2 | 368.5 | 363.3 | 387.6 | 364.3 | 372.1 | 384.4 | 389.4 |
| 50 | $\text{H}_2\text{C}=\text{CH}-\text{BH}_2$                                                                       | 472.9 | 488.3 | 470.9 | 476.0 | 478.2 | 469.7 | 486.7 | 490.7 | 494.4 |
| 51 | $\begin{array}{c} \text{H}_2\text{C}=\text{C}-\text{BH}_2 \\   \\ \text{CH}_3 \end{array}$                       | 450.2 | 466.7 | 450.0 | 452.7 | 457.8 | 445.4 | 462.1 | 468.2 | 470.6 |
| 52 | $\text{H}_3\text{CHC}=\text{CH}-\text{BH}_2$                                                                     | 487.2 | 501.5 | 483.2 | 489.4 | 489.8 | 484.3 | 499.8 | 503.7 | 509.0 |
| 53 | $(\text{H}_3\text{C})_2\text{C}=\text{CH}-\text{BH}_2$                                                           | 490.9 | 502.6 | 482.9 | 489.9 | 491.1 | 487.7 | 500.7 | 504.0 | 512.6 |
| 54 | $\begin{array}{c} \text{H}_3\text{CHC}=\text{C}-\text{BH}_2 \\   \\ \text{CH}_3 \end{array}$                     | 455.1 | 468.1 | 449.7 | 453.4 | 459.0 | 448.6 | 462.7 | 469.4 | 475.0 |
| 55 | $\text{H}_3\text{CH}_2\text{CH}_2\text{C}-\text{BH}_2$                                                           | 419.8 | 428.9 | 409.2 | 417.3 | 425.8 | 422.3 | 426.0 | 431.1 | 439.5 |
| 56 | $\text{H}_3\text{C}(\text{H}_2\text{C})_2\text{H}_2\text{C}-\text{BH}_2$                                         | 419.1 | 428.4 | 408.8 | 416.8 | 425.3 | 421.9 | 425.6 | 430.7 | 439.1 |
| 57 | $\text{H}_3\text{C}(\text{H}_2\text{C})_3\text{H}_2\text{C}-\text{BH}_2$                                         | 416.7 | 426.3 | 406.6 | 414.7 | 423.1 | 418.7 | 423.7 | 428.7 | 436.4 |
| 58 | $\text{H}_3\text{C}(\text{H}_2\text{C})_4\text{H}_2\text{C}-\text{BH}_2$                                         | 416.8 | 426.3 | 406.6 | 414.7 | 423.0 | 418.6 | 423.8 | 428.6 | 436.5 |
| 59 | $\begin{array}{c} \text{H}_3\text{CH}_2\text{CHC}-\text{BH}_2 \\   \\ \text{CH}_3 \end{array}$                   | 393.4 | 406.1 | 386.4 | 390.9 | 405.5 | 394.2 | 399.6 | 406.1 | 415.7 |
| 60 | $\begin{array}{c} \text{H}_3\text{CHC}-\text{H}_2\text{C}-\text{BH}_2 \\   \\ \text{CH}_3 \end{array}$           | 419.9 | 428.2 | 407.9 | 415.6 | 426.4 | 421.3 | 424.6 | 430.2 | 440.1 |
| 61 | $\begin{array}{c} (\text{H}_3\text{C})_2\text{HC}-\text{HC}-\text{BH}_2 \\   \\ \text{CH}_3 \end{array}$         | 394.2 | 407.5 | 387.7 | 392.0 | 407.8 | 394.6 | 402.2 | 407.7 | 416.4 |
| 62 | $\begin{array}{c} \text{CH}_3 \\   \\ \text{C}_2\text{H}_5-\text{C}-\text{BH}_2 \\   \\ \text{CH}_3 \end{array}$ | 370.8 | 385.3 | 365.6 | 366.6 | 389.8 | 367.0 | 375.6 | 384.5 | 393.7 |
| 63 | $(\text{H}_3\text{C})_3\text{C}-\text{H}_2\text{C}-\text{BH}_2$                                                  | 422.9 | 429.6 | 408.1 | 415.3 | 430.1 | 423.9 | 424.7 | 430.6 | 444.6 |
| 64 | $\begin{array}{c} (\text{H}_3\text{C})_3\text{C}-\text{HC}-\text{BH}_2 \\   \\ \text{CH}_3 \end{array}$          | 390.9 | 401.5 | 379.9 | 383.5 | 404.8 | 388.0 | 393.8 | 400.8 | 413.8 |

| Entry | compounds                                                                                            | MN12-SX | PBE1PBE | SOGGA11 | SOGGA11-X | TPSS  | wB97  | wB97XD |
|-------|------------------------------------------------------------------------------------------------------|---------|---------|---------|-----------|-------|-------|--------|
| 1     | $\text{CH}_3\text{CH}=\text{CH}-\text{B}(\text{OH})_2$                                               | 485.2   | 466.1   | 460.2   | 489.4     | 446.1 | 490.6 | 479.1  |
| 2     | $\text{H}_2\text{C}=\text{CH}-\text{B}(\text{OH})_2$                                                 | 477.6   | 459.3   | 454.2   | 483.1     | 440.0 | 483.5 | 471.5  |
| 3     | $\begin{array}{c} \text{H}_2\text{C}=\text{C}-\text{B}(\text{OH})_2 \\   \\ \text{CH}_3 \end{array}$ | 461.0   | 439.0   | 427.5   | 463.0     | 417.7 | 467.9 | 455.0  |

|    |                                                                                                                                |       |       |       |       |       |       |       |
|----|--------------------------------------------------------------------------------------------------------------------------------|-------|-------|-------|-------|-------|-------|-------|
| 4  | $\text{H}_2\text{C}=\underset{\text{CH}_2\text{CH}_3}{\text{C}}-\text{B}(\text{OH})_2$                                         | 461.8 | 438.7 | 427.0 | 462.5 | 416.6 | 469.2 | 456.8 |
| 5  | $\text{H}_3\text{CHC}=\underset{\text{CH}_3}{\text{C}}-\text{B}(\text{OH})_2$                                                  | 455.7 | 433.5 | 419.0 | 456.8 | 411.2 | 464.3 | 452.1 |
| 6  | $\text{C}_2\text{H}_5\text{HC}=\text{CH}-\text{B}(\text{OH})_2$                                                                | 484.3 | 465.5 | 459.4 | 488.7 | 445.4 | 490.1 | 479.0 |
| 7  | $\text{H}_2\text{C}=\underset{\text{CH}_3}{\text{CH}}-\overset{\text{B}-\text{OH}}{\text{B}}$                                  | 466.6 | 449.4 | 447.6 | 471.5 | 430.2 | 472.7 | 462.7 |
| 8  | $\text{H}_3\text{CHC}=\underset{\text{CH}_3}{\text{CH}}-\overset{\text{B}-\text{OH}}{\text{B}}$                                | 476.8 | 458.7 | 456.3 | 480.6 | 438.4 | 482.2 | 472.4 |
| 9  | $(\text{H}_3\text{C})_2\text{C}=\underset{\text{CH}_3}{\text{CH}}-\overset{\text{B}-\text{OH}}{\text{B}}$                      | 474.0 | 455.8 | 448.2 | 477.8 | 434.7 | 480.2 | 470.6 |
| 10 | $\text{H}_2\text{C}=\underset{\text{CH}_3}{\overset{\text{CH}_3}{\text{C}}}-\overset{\text{B}-\text{OH}}{\text{B}}$            | 449.2 | 427.5 | 420.1 | 450.2 | 406.0 | 456.2 | 445.5 |
| 11 | $\text{H}_3\text{CHC}=\underset{\text{CH}_3}{\overset{\text{CH}_3}{\text{C}}}-\overset{\text{B}-\text{OH}}{\text{B}}$          | 450.8 | 428.5 | 416.1 | 450.9 | 406.2 | 458.1 | 447.8 |
| 12 | $\text{H}_2\text{C}=\underset{\text{CH}_3}{\overset{\text{CH}_2\text{CH}_3}{\text{C}}}-\overset{\text{B}-\text{OH}}{\text{B}}$ | 448.7 | 425.5 | 417.3 | 448.2 | 403.4 | 456.3 | 446.7 |
| 13 | $\text{H}_2\text{C}=\text{CH}-\text{B}(\text{CH}_3)_2$                                                                         | 470.8 | 454.4 | 452.6 | 477.4 | 435.3 | 478.7 | 469.5 |
| 14 | $\text{H}_3\text{CHC}=\text{CH}-\text{B}(\text{CH}_3)_2$                                                                       | 480.4 | 463.3 | 461.9 | 485.5 | 443.6 | 487.3 | 479.2 |
| 15 | $(\text{H}_3\text{C})_2\text{C}=\text{CH}-\text{B}(\text{CH}_3)_2$                                                             | 472.4 | 453.5 | 449.0 | 475.4 | 433.0 | 479.1 | 471.9 |
| 16 | $\text{H}_2\text{C}=\underset{\text{CH}_3}{\text{C}}-\text{B}(\text{CH}_3)_2$                                                  | 450.5 | 429.5 | 421.5 | 452.9 | 408.6 | 459.5 | 449.9 |
| 17 | $\text{H}_3\text{CHC}=\underset{\text{CH}_3}{\text{C}}-\text{B}(\text{CH}_3)_2$                                                | 451.9 | 430.6 | 418.2 | 453.3 | 409.2 | 461.1 | 452.4 |
| 18 | $\text{H}_2\text{C}=\underset{\text{C}_2\text{H}_5}{\text{C}}-\text{B}(\text{CH}_3)_2$                                         | 450.7 | 427.8 | 414.9 | 450.9 | 405.4 | 460.0 | 450.4 |
| 19 | $\text{C}_2\text{H}_5\text{HC}=\text{CH}-\text{B}(\text{CH}_3)_2$                                                              | 465.1 | 446.5 | 445.1 | 469.0 | 426.8 | 472.8 | 465.9 |
| 20 | $\text{H}_2\text{C}=\underset{\text{C}_2\text{H}_5}{\text{CH}}-\overset{\text{B}-\text{OH}}{\text{B}}$                         | 470.5 | 452.6 | 447.3 | 474.5 | 432.6 | 476.9 | 467.0 |
| 21 | $\text{H}_2\text{C}=\underset{\text{CH}(\text{CH}_3)_2}{\text{CH}}-\overset{\text{B}-\text{OH}}{\text{B}}$                     | 476.1 | 458.0 | 451.9 | 482.0 | 437.3 | 487.6 | 475.5 |
| 22 | $\text{H}_2\text{C}=\underset{\text{C}_2\text{H}_5}{\overset{\text{CH}_3}{\text{C}}}-\overset{\text{B}-\text{OH}}{\text{B}}$   | 454.8 | 432.4 | 419.4 | 454.6 | 410.7 | 461.9 | 451.6 |
| 23 | $\text{H}_3\text{CHC}=\underset{\text{C}_2\text{H}_5}{\text{CH}}-\overset{\text{B}-\text{OH}}{\text{B}}$                       | 478.8 | 460.2 | 454.5 | 481.4 | 439.4 | 484.4 | 475.1 |
| 24 | $\text{H}_2\text{C}=\text{CH}-\text{B}(\text{C}_2\text{H}_5)_2$                                                                | 469.4 | 451.6 | 451.7 | 474.5 | 432.2 | 477.1 | 469.4 |
| 25 | $\text{H}_3\text{C}-\text{B}(\text{OH})_2$                                                                                     | 445.9 | 425.0 | 427.3 | 447.5 | 403.6 | 449.8 | 436.9 |
| 26 | $\text{C}_2\text{H}_5-\text{B}(\text{OH})_2$                                                                                   | 424.9 | 403.0 | 400.2 | 426.0 | 380.9 | 430.6 | 418.0 |
| 27 | $(\text{H}_3\text{C})_2\text{HC}-\text{B}(\text{OH})_2$                                                                        | 405.4 | 382.7 | 376.9 | 405.5 | 360.1 | 413.0 | 401.0 |
| 28 | $(\text{H}_3\text{C})_3\text{C}-\text{B}(\text{OH})_2$                                                                         | 392.3 | 366.5 | 355.7 | 389.5 | 342.7 | 401.0 | 387.9 |
| 29 | $\text{C}_3\text{H}_7-\text{B}(\text{OH})_2$                                                                                   | 429.7 | 407.3 | 403.8 | 430.0 | 383.6 | 435.6 | 423.0 |
| 30 | $\text{C}_4\text{H}_9-\text{B}(\text{OH})_2$                                                                                   | 429.2 | 406.8 | 403.7 | 429.3 | 383.0 | 435.0 | 422.9 |
| 31 | $\text{C}_2\text{H}_5\text{HC}-\underset{\text{CH}_3}{\text{B}(\text{OH})_2}$                                                  | 404.4 | 381.4 | 374.2 | 404.4 | 358.2 | 412.5 | 400.8 |
| 32 | $(\text{H}_3\text{C})_2\text{CHCH}_2-\text{B}(\text{OH})_2$                                                                    | 428.5 | 405.2 | 402.6 | 427.6 | 382.1 | 434.7 | 423.5 |
| 33 | $\text{H}_3\text{C}-\text{B}(\text{CH}_3)_2$                                                                                   | 434.3 | 415.0 | 424.5 | 435.8 | 394.0 | 440.0 | 429.8 |
| 34 | $\text{C}_2\text{H}_5-\text{B}(\text{C}_2\text{H}_5)_2$                                                                        | 410.5 | 388.9 | 397.5 | 409.8 | 367.1 | 417.8 | 410.8 |

|    |                                                                                                     |       |       |       |       |       |       |       |
|----|-----------------------------------------------------------------------------------------------------|-------|-------|-------|-------|-------|-------|-------|
| 35 | $\text{HC}\equiv\text{C}-\text{BF}_2$                                                               | 618.7 | 602.8 | 604.6 | 629.3 | 583.1 | 625.1 | 611.5 |
| 36 | $\text{HC}\equiv\text{C}-\text{BCl}_2$                                                              | 604.8 | 591.5 | 591.1 | 613.5 | 571.5 | 610.1 | 597.1 |
| 37 | $\text{C}_2\text{H}_5-\overset{\text{OH}}{\underset{\text{CH}_3}{\text{B}}}$                        | 414.9 | 393.7 | 395.1 | 415.0 | 371.8 | 420.3 | 409.8 |
| 38 | $(\text{H}_3\text{C})_2\text{HC}-\overset{\text{OH}}{\underset{\text{CH}_3}{\text{B}}}$             | 392.3 | 370.3 | 370.3 | 391.8 | 348.4 | 400.2 | 390.5 |
| 39 | $(\text{H}_3\text{C})_3\text{C}-\overset{\text{OH}}{\underset{\text{CH}_3}{\text{B}}}$              | 380.5 | 353.7 | 347.4 | 375.6 | 330.0 | 389.3 | 378.8 |
| 40 | $(\text{H}_3\text{C})_2\text{HC}-\overset{\text{OH}}{\underset{\text{C}_2\text{H}_5}{\text{B}}}$    | 395.0 | 371.2 | 366.2 | 392.3 | 348.6 | 402.7 | 393.3 |
| 41 | $\text{C}_3\text{H}_7-\overset{\text{OH}}{\underset{\text{C}_2\text{H}_5}{\text{B}}}$               | 420.2 | 397.9 | 395.6 | 418.3 | 374.3 | 426.3 | 416.4 |
| 42 | $\text{H}_3\text{C}-\text{BH}_2$                                                                    | 448.1 | 432.0 | 448.8 | 451.2 | 412.6 | 451.9 | 439.9 |
| 43 | $\text{C}_2\text{H}_5-\text{BH}_2$                                                                  | 428.0 | 412.1 | 426.4 | 431.6 | 392.0 | 433.9 | 422.4 |
| 44 | $(\text{H}_3\text{C})_2\text{HC}-\text{BH}_2$                                                       | 408.2 | 391.8 | 403.4 | 411.4 | 371.4 | 415.9 | 404.2 |
| 45 | $(\text{H}_3\text{C})_3\text{C}-\text{BH}_2$                                                        | 392.4 | 374.4 | 384.9 | 393.9 | 353.6 | 402.1 | 389.6 |
| 46 | $\text{H}_3\text{C}-\text{BH}-\text{OH}$                                                            | 447.2 | 430.0 | 439.9 | 451.6 | 410.3 | 453.6 | 439.9 |
| 47 | $\text{H}_3\text{CH}_2\text{C}-\text{BH}-\text{OH}$                                                 | 423.0 | 406.0 | 412.8 | 428.1 | 386.1 | 431.5 | 418.4 |
| 48 | $(\text{H}_3\text{C})_2\text{HC}-\text{BH}-\text{OH}$                                               | 402.7 | 385.8 | 391.9 | 408.0 | 365.8 | 413.8 | 401.1 |
| 49 | $(\text{H}_3\text{C})_3\text{C}-\text{BH}-\text{OH}$                                                | 391.9 | 371.4 | 371.8 | 393.8 | 349.6 | 404.1 | 389.8 |
| 50 | $\text{H}_2\text{C}=\text{CH}-\text{BH}_2$                                                          | 488.7 | 476.7 | 485.8 | 497.9 | 460.0 | 493.8 | 483.8 |
| 51 | $\text{H}_2\text{C}=\overset{\text{BH}_2}{\underset{\text{CH}_3}{\text{C}}}$                        | 469.5 | 455.3 | 462.1 | 476.5 | 437.2 | 476.0 | 465.6 |
| 52 | $\text{H}_3\text{CCH}=\text{CH}-\text{BH}_2$                                                        | 501.7 | 489.8 | 500.3 | 509.7 | 472.2 | 505.9 | 497.0 |
| 53 | $(\text{H}_3\text{C})_2\text{C}=\text{CH}-\text{BH}_2$                                              | 502.7 | 490.5 | 497.3 | 509.7 | 472.2 | 506.5 | 498.1 |
| 54 | $\text{H}_3\text{CCH}=\overset{\text{BH}_2}{\underset{\text{CH}_3}{\text{C}}}$                      | 471.1 | 456.3 | 460.1 | 476.4 | 437.9 | 477.0 | 467.2 |
| 55 | $\text{H}_3\text{CH}_2\text{CH}_2\text{C}-\text{BH}_2$                                              | 432.8 | 416.4 | 431.2 | 435.7 | 394.7 | 439.0 | 427.5 |
| 56 | $\text{H}_3\text{C}(\text{H}_2\text{C})_2\text{H}_2\text{C}-\text{BH}_2$                            | 432.4 | 416.0 | 431.1 | 435.2 | 394.1 | 438.7 | 427.3 |
| 57 | $\text{H}_3\text{C}(\text{H}_2\text{C})_3\text{H}_2\text{C}-\text{BH}_2$                            | 429.9 | 413.8 | 429.4 | 433.1 | 393.2 | 436.1 | 425.1 |
| 58 | $\text{H}_3\text{C}(\text{H}_2\text{C})_4\text{H}_2\text{C}-\text{BH}_2$                            | 429.9 | 413.8 | 429.5 | 433.1 | 393.1 | 436.2 | 425.3 |
| 59 | $\text{H}_3\text{CH}_2\text{CHC}-\overset{\text{BH}_2}{\underset{\text{CH}_3}{\text{C}}}$           | 410.3 | 393.0 | 402.7 | 412.5 | 371.2 | 418.2 | 406.4 |
| 60 | $\text{H}_3\text{CHC}-\overset{\text{H}_2\text{C}-\text{BH}_2}{\underset{\text{CH}_3}{\text{C}}}$   | 432.4 | 415.3 | 431.4 | 434.3 | 393.9 | 439.0 | 428.2 |
| 61 | $(\text{H}_3\text{C})_2\text{HC}-\overset{\text{HC}-\text{BH}_2}{\underset{\text{CH}_3}{\text{C}}}$ | 411.3 | 394.5 | 408.3 | 413.2 | 373.3 | 419.5 | 408.5 |
| 62 | $\text{C}_2\text{H}_5-\overset{\text{CH}_3}{\underset{\text{CH}_3}{\text{C}}}-\text{BH}_2$          | 390.9 | 371.7 | 380.3 | 391.1 | 350.4 | 401.1 | 389.4 |
| 63 | $(\text{H}_3\text{C})_3\text{C}-\text{H}_2\text{C}-\text{BH}_2$                                     | 434.1 | 415.8 | 428.0 | 434.8 | 393.1 | 441.0 | 430.6 |
| 64 | $(\text{H}_3\text{C})_3\text{C}-\overset{\text{HC}-\text{BH}_2}{\underset{\text{CH}_3}{\text{C}}}$  | 405.5 | 387.0 | 395.3 | 406.0 | 365.9 | 413.8 | 403.4 |

**Table S3** The Cartesian coordinates and absolute energy values (hartrees) of selected molecules and radicals

|                                                                                                      |             |             |             |                                                                                                                                |             |             |             |
|------------------------------------------------------------------------------------------------------|-------------|-------------|-------------|--------------------------------------------------------------------------------------------------------------------------------|-------------|-------------|-------------|
| <b>Molecules:</b>                                                                                    |             |             |             |                                                                                                                                |             |             |             |
| $\begin{array}{c} \text{H}_2\text{C}=\text{C}-\text{B}(\text{OH})_2 \\   \\ \text{CH}_3 \end{array}$ |             |             |             | $\begin{array}{c} \text{H}_2\text{C}=\text{C}-\text{B}(\text{OH})_2 \\   \\ \text{C}_2\text{H}_5 \end{array}$                  |             |             |             |
| SCF energy=-293.9569145                                                                              |             |             |             | SCF energy=-333.2715555                                                                                                        |             |             |             |
| C                                                                                                    | 0.78031200  | 0.15783800  | 0.00105200  | C                                                                                                                              | -0.22711600 | 0.65296300  | -0.22328800 |
| C                                                                                                    | 1.33128500  | 1.38290600  | 0.05708100  | C                                                                                                                              | -0.11905600 | 1.99213300  | -0.15768600 |
| H                                                                                                    | 2.41007800  | 1.53646200  | 0.06364700  | H                                                                                                                              | 0.82805100  | 2.50141300  | 0.02263000  |
| H                                                                                                    | 0.73943100  | 2.29731500  | 0.10795700  | H                                                                                                                              | -0.97393800 | 2.65202000  | -0.30580400 |
| C                                                                                                    | 1.64905200  | -1.08028000 | -0.05213700 | C                                                                                                                              | -1.56734200 | -0.00273300 | -0.49982300 |
| H                                                                                                    | 2.71628700  | -0.83006500 | -0.04115900 | H                                                                                                                              | -2.29349800 | 0.75836700  | -0.81572100 |
| H                                                                                                    | 1.43855000  | -1.74215800 | 0.79712100  | H                                                                                                                              | -1.45621000 | -0.70717500 | -1.33461700 |
| H                                                                                                    | 1.44083300  | -1.66865500 | -0.95479800 | C                                                                                                                              | -2.12668700 | -0.76688000 | 0.71445200  |
| B                                                                                                    | -0.78284400 | -0.03840600 | 0.00146500  | H                                                                                                                              | -2.28093600 | -0.09317300 | 1.56612500  |
| O                                                                                                    | -1.27082100 | -1.31729500 | 0.06216500  | H                                                                                                                              | -3.09049000 | -1.22927800 | 0.46909800  |
| H                                                                                                    | -2.24088900 | -1.33624500 | 0.05653300  | H                                                                                                                              | -1.44473400 | -1.56480600 | 1.02977200  |
| O                                                                                                    | -1.70776400 | 0.98059700  | -0.05610600 | B                                                                                                                              | 1.04376700  | -0.26295500 | -0.05146800 |
| H                                                                                                    | -1.32528400 | 1.86618000  | -0.12108000 | O                                                                                                                              | 0.99008400  | -1.54960400 | -0.52003500 |
| C <sub>2</sub> H <sub>5</sub> HC=CH-B(OH) <sub>2</sub> SCF energy=-333.2710475                       |             |             |             | $\begin{array}{c} \text{CH}_3 \\   \\ \text{H}_3\text{C}-\text{C}=\text{C}-\text{B}-\text{OH} \\   \\ \text{CH}_3 \end{array}$ |             |             |             |
| C                                                                                                    | 0.26840200  | -0.58669600 | -0.11574800 | SCF energy=-297.2945035                                                                                                        |             |             |             |
| H                                                                                                    | 0.14416400  | -1.66912000 | -0.03544600 | C                                                                                                                              | -0.29677900 | 0.26104300  | 0.00003600  |
| C                                                                                                    | -0.83632500 | 0.14781700  | -0.33551000 | C                                                                                                                              | -1.31847800 | -0.62583500 | 0.00008200  |
| H                                                                                                    | -0.75304700 | 1.23807400  | -0.41875500 | H                                                                                                                              | -1.04919000 | -1.68261800 | 0.00018800  |
| C                                                                                                    | -2.24090600 | -0.37167600 | -0.47508800 | C                                                                                                                              | -2.79936800 | -0.37233300 | 0.00003200  |
| H                                                                                                    | -2.61552600 | -0.12227400 | -1.47985800 | H                                                                                                                              | -3.06692300 | 0.68764600  | 0.00012600  |
| H                                                                                                    | -2.23587600 | -1.46639700 | -0.40204800 | H                                                                                                                              | -3.26608600 | -0.83938600 | -0.87907500 |
| C                                                                                                    | -3.20227800 | 0.22306100  | 0.57037100  | H                                                                                                                              | -3.26622900 | -0.83961500 | 0.87893800  |
| H                                                                                                    | -3.23330400 | 1.31801600  | 0.50482700  | C                                                                                                                              | -0.49707200 | 1.76497000  | -0.00009700 |
| H                                                                                                    | -4.22196900 | -0.14924000 | 0.41759700  | H                                                                                                                              | -1.54897000 | 2.06570600  | 0.00052700  |
| H                                                                                                    | -2.89075500 | -0.04318400 | 1.58695200  | H                                                                                                                              | -0.02557300 | 2.22757600  | 0.87793500  |
| B                                                                                                    | 1.71774300  | -0.02556600 | 0.03150700  | H                                                                                                                              | -0.02670700 | 2.22728600  | -0.87890300 |
| O                                                                                                    | 2.06204100  | 1.30921100  | -0.04014600 | B                                                                                                                              | 1.17246300  | -0.29448900 | 0.00000700  |
| H                                                                                                    | 1.31550400  | 1.90464200  | -0.19255300 | C                                                                                                                              | 2.44523000  | 0.65612700  | 0.00010500  |
| O                                                                                                    | 2.73468500  | -0.91926300 | 0.24902500  | H                                                                                                                              | 2.44235200  | 1.32176100  | 0.87546300  |
| H                                                                                                    | 3.59492100  | -0.47730400 | 0.32656300  | H                                                                                                                              | 3.40500400  | 0.12085200  | 0.00000000  |
| (H <sub>3</sub> C) <sub>2</sub> C=CH-B(OH) <sub>2</sub> SCF energy=-297.2964235                      |             |             |             | H                                                                                                                              | 2.44224600  | 1.32193700  | -0.87512200 |
| C                                                                                                    | -0.04443200 | -0.68636600 | 0.00012800  | O                                                                                                                              | 1.32988400  | -1.66310900 | -0.00012200 |
| H                                                                                                    | -0.03174700 | -1.78085200 | 0.00018400  | H                                                                                                                              | 2.25749100  | -1.93765900 | -0.00008300 |
| C                                                                                                    | -1.28333800 | -0.13571700 | 0.00003200  | (H <sub>3</sub> C) <sub>2</sub> C=CH-B(CH <sub>3</sub> ) <sub>2</sub> SCF energy=-261.3157029                                  |             |             |             |
| C                                                                                                    | -1.56510600 | 1.34663500  | -0.00005800 | C                                                                                                                              | -0.07591400 | 0.69816300  | -0.08294500 |
| H                                                                                                    | -0.65578200 | 1.94625300  | 0.00039500  | H                                                                                                                              | -0.10983800 | 1.78858500  | -0.18608800 |
| H                                                                                                    | -2.16765400 | 1.61651600  | -0.87971900 | C                                                                                                                              | -1.30415800 | 0.12280600  | -0.00425200 |
| H                                                                                                    | -2.16873500 | 1.61645800  | 0.87884600  | C                                                                                                                              | -1.57123400 | -1.34773200 | 0.20292400  |
| C                                                                                                    | -2.52461600 | -0.99795900 | -0.00002300 | H                                                                                                                              | -2.25417900 | -1.49191300 | 1.05194200  |
| H                                                                                                    | -3.14798900 | -0.78232600 | -0.87967100 | H                                                                                                                              | -2.08110000 | -1.76987900 | -0.67554300 |
| H                                                                                                    | -2.28593500 | -2.06613400 | -0.00029800 | H                                                                                                                              | -0.67010900 | -1.92994400 | 0.38851300  |
| H                                                                                                    | -3.14777500 | -0.78274400 | 0.87987900  | C                                                                                                                              | -2.56348500 | 0.95393800  | -0.09378700 |
| B                                                                                                    | 1.36551700  | -0.02342200 | 0.00007500  |                                                                                                                                |             |             |             |

|                                                                                              |             |             |             |                                                                                                     |             |             |             |
|----------------------------------------------------------------------------------------------|-------------|-------------|-------------|-----------------------------------------------------------------------------------------------------|-------------|-------------|-------------|
| C                                                                                            | 2.66348300  | -0.94146000 | -0.00010100 | H                                                                                                   | -2.34741400 | 2.00925500  | -0.28564200 |
| H                                                                                            | 2.67025800  | -1.60591900 | -0.87655900 | H                                                                                                   | -3.21746700 | 0.58200700  | -0.89567400 |
| H                                                                                            | 3.61372300  | -0.38902500 | 0.00033900  | H                                                                                                   | -3.14570200 | 0.88363700  | 0.83628200  |
| H                                                                                            | 2.66981500  | -1.60668900 | 0.87576900  | B                                                                                                   | 1.36429400  | 0.10579200  | -0.02639700 |
| O                                                                                            | 1.49150600  | 1.35042100  | 0.00007600  | C                                                                                                   | 2.56263800  | 1.12809500  | 0.16010000  |
| H                                                                                            | 2.41625200  | 1.63740000  | -0.00001500 | H                                                                                                   | 3.34206600  | 0.73815200  | 0.83053800  |
| H <sub>3</sub> CHC=CH-B(CH <sub>3</sub> ) <sub>2</sub> SCF energy=-222.0019484               |             |             |             |                                                                                                     |             |             |             |
| C                                                                                            | 0.38978300  | 0.52420400  | -0.02371900 | H                                                                                                   | 3.06174700  | 1.25505200  | -0.81673200 |
| H                                                                                            | 0.58899000  | 1.60100300  | -0.06497000 | H                                                                                                   | 2.27317500  | 2.12877300  | 0.50448100  |
| C                                                                                            | 1.47425700  | -0.27931700 | 0.01414500  | C                                                                                                   | 1.74701500  | -1.42845400 | -0.18697700 |
| H                                                                                            | 1.32653100  | -1.36026700 | 0.05611600  | H                                                                                                   | 2.79916200  | -1.56205100 | -0.47184900 |
| C                                                                                            | 2.90659600  | 0.16601500  | 0.00360000  | H                                                                                                   | 1.63082300  | -1.93873500 | 0.78428300  |
| H                                                                                            | 3.43298200  | -0.19124800 | 0.90006000  | H                                                                                                   | 1.12819400  | -1.98279500 | -0.90290700 |
| H                                                                                            | 3.44085500  | -0.25930200 | -0.85785200 | H <sub>3</sub> CHC=C-B(CH <sub>3</sub> ) <sub>2</sub><br>CH <sub>3</sub> SCF energy=-261.3151649    |             |             |             |
| H                                                                                            | 2.99411900  | 1.25693700  | -0.03835300 | C                                                                                                   | -0.32094500 | 0.26682800  | -0.01148800 |
| B                                                                                            | -1.08961000 | 0.03548100  | -0.01396300 | C                                                                                                   | -1.31250800 | -0.65876800 | 0.00253400  |
| C                                                                                            | -1.49353400 | -1.49580400 | -0.00271300 | H                                                                                                   | -1.01783700 | -1.70750200 | 0.01023200  |
| H                                                                                            | -2.28010400 | -1.68868100 | 0.74183600  | C                                                                                                   | -2.80224200 | -0.46535700 | 0.01683800  |
| H                                                                                            | -1.95273700 | -1.74399300 | -0.97384200 | H                                                                                                   | -3.11462300 | 0.58156500  | 0.00914000  |
| H                                                                                            | -0.68393100 | -2.21529500 | 0.16570100  | H                                                                                                   | -3.25870500 | -0.96402300 | -0.85019800 |
| C                                                                                            | -2.24459000 | 1.11983900  | 0.00485100  | H                                                                                                   | -3.23682600 | -0.94196400 | 0.90722800  |
| H                                                                                            | -3.20771500 | 0.75867800  | -0.37834900 | C                                                                                                   | -0.61200900 | 1.75816600  | -0.02427300 |
| H                                                                                            | -2.42063900 | 1.40323900  | 1.05780600  | H                                                                                                   | -0.07387600 | 2.25557200  | -0.84134600 |
| H                                                                                            | -1.98536400 | 2.05189800  | -0.51531600 | H                                                                                                   | -1.67283100 | 1.99981800  | -0.13815100 |
| C <sub>2</sub> H <sub>5</sub> HC=CH-B(CH <sub>3</sub> ) <sub>2</sub> SCF energy=-261.3106173 |             |             |             |                                                                                                     |             |             |             |
| C                                                                                            | -0.39593200 | -1.07202100 | 0.19387200  | H                                                                                                   | -0.26662200 | 2.23459500  | 0.90353000  |
| H                                                                                            | -0.78996700 | -2.04334000 | 0.51266200  | B                                                                                                   | 1.17722500  | -0.20624600 | 0.00609600  |
| C                                                                                            | 0.93130500  | -1.07811600 | -0.06943700 | C                                                                                                   | 2.33374500  | 0.88182000  | 0.03253700  |
| H                                                                                            | 1.47847700  | -2.01370700 | 0.08596500  | H                                                                                                   | 3.32988800  | 0.46519900  | 0.22593500  |
| C                                                                                            | 1.79811400  | 0.03347500  | -0.59308800 | H                                                                                                   | 2.38253900  | 1.38139200  | -0.95021300 |
| H                                                                                            | 1.20681600  | 0.92412000  | -0.81869600 | H                                                                                                   | 2.15321900  | 1.68934700  | 0.75592500  |
| H                                                                                            | 2.24204100  | -0.29896900 | -1.54447000 | C                                                                                                   | 1.62949300  | -1.72460000 | -0.01908300 |
| C                                                                                            | 2.94044300  | 0.38818000  | 0.37843400  | H                                                                                                   | 0.85180700  | -2.48672700 | -0.13599900 |
| H                                                                                            | 3.55755700  | -0.49047000 | 0.60457600  | H                                                                                                   | 2.36908400  | -1.87571000 | -0.82060400 |
| H                                                                                            | 3.59439700  | 1.15508700  | -0.05306200 | H                                                                                                   | 2.17545300  | -1.94886500 | 0.91165100  |
| H                                                                                            | 2.54518300  | 0.77107100  | 1.32647100  | H <sub>2</sub> C=C-B-OH<br>CH <sub>3</sub><br>C <sub>2</sub> H <sub>5</sub> SCF energy=-297.2924721 |             |             |             |
| B                                                                                            | -1.46291000 | 0.06131100  | 0.05554600  | C                                                                                                   | -1.30277600 | -0.26451100 | -0.00003700 |
| C                                                                                            | -1.14647500 | 1.61548300  | 0.05696300  | C                                                                                                   | -1.60225600 | -1.57712700 | -0.00010900 |
| H                                                                                            | -1.01859700 | 1.95181800  | -0.98644600 | H                                                                                                   | -0.83327000 | -2.34685600 | -0.00016400 |
| H                                                                                            | -1.98797500 | 2.20107000  | 0.45211700  | H                                                                                                   | -2.63138200 | -1.93830500 | -0.00019300 |
| H                                                                                            | -0.23916300 | 1.90953300  | 0.59667000  | C                                                                                                   | -2.40206800 | 0.77750700  | 0.00009300  |
| C                                                                                            | -2.98264400 | -0.37788300 | -0.03549200 | H                                                                                                   | -2.32388400 | 1.43312500  | 0.87679300  |
| H                                                                                            | -3.40072500 | -0.33536200 | 0.98647100  | H                                                                                                   | -2.32357800 | 1.43385500  | -0.87597300 |
| H                                                                                            | -3.59705700 | 0.30965900  | -0.63235700 | H                                                                                                   | -3.39874500 | 0.31978600  | -0.00019200 |
| H                                                                                            | -3.14530600 | -1.40177800 | -0.39514600 | B                                                                                                   | 0.19695400  | 0.21283600  | -0.00000100 |
| H <sub>2</sub> C=CH-B-OH<br>CH(CH <sub>3</sub> ) <sub>2</sub> SCF energy=-297.2879671        |             |             |             |                                                                                                     |             |             |             |
| C                                                                                            | 1.64091300  | -0.61899800 | 0.31776900  | O                                                                                                   | 0.37155000  | 1.57504200  | -0.00012000 |
| H                                                                                            | 1.52132600  | -1.61772300 | 0.74529700  | H                                                                                                   | 1.30223100  | 1.84552000  | -0.00008700 |
| C                                                                                            | 2.89290100  | -0.20704400 | 0.05370600  | C                                                                                                   | 1.44880800  | -0.77274800 | 0.00014200  |
| H                                                                                            | 3.76818000  | -0.82595400 | 0.24843300  | H                                                                                                   | 1.36644200  | -1.44279800 | -0.86951300 |
| H                                                                                            | 3.08281000  | 0.77708500  | -0.37099100 | H                                                                                                   | 1.36651500  | -1.44250800 | 0.87003600  |
| B                                                                                            | 0.36605700  | 0.25532700  | 0.05971600  | C                                                                                                   | 2.83958500  | -0.11283400 | -0.00001900 |
| O                                                                                            | 0.57686200  | 1.50614100  | -0.46540200 | H                                                                                                   | 3.64273100  | -0.85932900 | 0.00012200  |
| H                                                                                            | -0.23968200 | 2.01070000  | -0.59515800 | H                                                                                                   | 2.99397200  | 0.51545800  | -0.88832400 |
| C                                                                                            | -1.09751300 | -0.29030800 | 0.38454400  | H                                                                                                   | 2.99404500  | 0.51580700  | 0.88803900  |
| H                                                                                            | -1.05412700 | -0.70976500 | 1.40420100  | (H <sub>3</sub> C) <sub>2</sub> HCH <sub>2</sub> C-B(OH) <sub>2</sub> SCF energy=-334.4949524       |             |             |             |
| C                                                                                            | -2.20765900 | 0.77604800  | 0.36442800  | C                                                                                                   | -0.01960000 | -0.81039300 | -0.02362800 |
| H                                                                                            | -2.34097400 | 1.20629100  | -0.63999800 | H                                                                                                   | -0.03556300 | -1.59303300 | -0.80201100 |
| H                                                                                            | -3.17864100 | 0.34854000  | 0.64689000  | H                                                                                                   | -0.14536700 | -1.35389000 | 0.92791600  |
|                                                                                              |             |             |             | C                                                                                                   | -1.23264700 | 0.12333900  | -0.23688300 |

|                                                                                            |             |             |             |                                                                                                       |             |             |             |
|--------------------------------------------------------------------------------------------|-------------|-------------|-------------|-------------------------------------------------------------------------------------------------------|-------------|-------------|-------------|
| H                                                                                          | -2.00309900 | 1.60010400  | 1.06107400  | H                                                                                                     | -1.06247700 | 0.68069700  | -1.16848500 |
| C                                                                                          | -1.45362000 | -1.46355900 | -0.56212900 | C                                                                                                     | -2.53307600 | -0.68022200 | -0.39294600 |
| H                                                                                          | -0.70448100 | -2.26297400 | -0.52476300 | H                                                                                                     | -3.39161900 | -0.01909700 | -0.56729800 |
| H                                                                                          | -2.42407300 | -1.90316800 | -0.29529400 | H                                                                                                     | -2.47277300 | -1.38006000 | -1.23615700 |
| H                                                                                          | -1.52255100 | -1.12573300 | -1.60495800 | H                                                                                                     | -2.74400900 | -1.26684900 | 0.51227600  |
| H <sub>2</sub> C=CH-B(C <sub>2</sub> H <sub>5</sub> ) <sub>2</sub> SCF energy=-261.3042316 |             |             |             | C                                                                                                     | -1.35949600 | 1.14543700  | 0.90394000  |
| C                                                                                          | 1.67001100  | -0.70714000 | -0.09233600 | H                                                                                                     | -0.45910200 | 1.76482900  | 0.99187200  |
| H                                                                                          | 1.79626700  | -1.78506600 | -0.23772700 | H                                                                                                     | -2.21009200 | 1.81852900  | 0.73864200  |
| C                                                                                          | 2.80114500  | 0.00651500  | 0.06499900  | H                                                                                                     | -1.52004500 | 0.63950900  | 1.86664600  |
| H                                                                                          | 2.78755100  | 1.08772700  | 0.19261300  | B                                                                                                     | 1.41034200  | -0.13184700 | -0.09548400 |
| H                                                                                          | 3.78946500  | -0.45253000 | 0.05695400  | O                                                                                                     | 1.60759700  | 0.96216900  | -0.89634700 |
| B                                                                                          | 0.21999900  | -0.11426500 | -0.16199200 | H                                                                                                     | 2.53165800  | 1.25862800  | -0.88269400 |
| C                                                                                          | -0.08837300 | 1.34339100  | 0.38356300  | O                                                                                                     | 2.51673800  | -0.61016700 | 0.57804200  |
| H                                                                                          | 0.79690200  | 1.99223900  | 0.31539600  | H                                                                                                     | 2.33192000  | -1.37500100 | 1.14025900  |
| H                                                                                          | -0.23254900 | 1.20932700  | 1.47284200  | C <sub>2</sub> H <sub>5</sub> -B(C <sub>2</sub> H <sub>5</sub> ) <sub>2</sub> SCF energy=-262.5269456 |             |             |             |
| C                                                                                          | -1.31269200 | 2.08203000  | -0.18781000 | B                                                                                                     | 0.16254900  | -0.04339200 | 0.12131300  |
| H                                                                                          | -1.44819700 | 3.06373700  | 0.28339400  | C                                                                                                     | 1.65592400  | 0.03310400  | 0.65177500  |
| H                                                                                          | -1.21060800 | 2.24970500  | -1.26766500 | H                                                                                                     | 1.82288300  | -0.61776500 | 1.52265500  |
| H                                                                                          | -2.23810100 | 1.51460100  | -0.03367500 | H                                                                                                     | 1.91820900  | 1.05691100  | 0.95928200  |
| C                                                                                          | -0.94435400 | -1.06060300 | -0.67781100 | C                                                                                                     | 2.63321600  | -0.39577800 | -0.47523200 |
| H                                                                                          | -1.68585500 | -0.50894200 | -1.27188500 | H                                                                                                     | 2.53833200  | 0.24764100  | -1.35891800 |
| H                                                                                          | -0.55554700 | -1.86352100 | -1.32065500 | H                                                                                                     | 3.67561300  | -0.33964100 | -0.13848800 |
| C                                                                                          | -1.67606400 | -1.71250400 | 0.52757200  | H                                                                                                     | 2.44941400  | -1.42877800 | -0.79740300 |
| H                                                                                          | -2.13763400 | -0.95665600 | 1.17474700  | C                                                                                                     | -0.69057400 | -1.33437200 | 0.45864200  |
| H                                                                                          | -2.47125700 | -2.38793500 | 0.18861900  | H                                                                                                     | -0.03627500 | -2.22042700 | 0.40292000  |
| H                                                                                          | -0.98847500 | -2.30149100 | 1.14793500  | H                                                                                                     | -0.90643900 | -1.25062000 | 1.54158600  |
| C <sub>2</sub> H <sub>5</sub> -B(OH) <sub>2</sub> SCF energy=-255.8636894                  |             |             |             | C                                                                                                     | -1.99937400 | -1.59760500 | -0.30354600 |
| C                                                                                          | -0.79205000 | 0.77190200  | -0.00015300 | H                                                                                                     | -1.81617400 | -1.73220900 | -1.37721300 |
| H                                                                                          | -0.81760400 | 1.44660100  | 0.87167900  | H                                                                                                     | -2.50599800 | -2.50209900 | 0.05625100  |
| H                                                                                          | -0.81752100 | 1.44583700  | -0.87259900 | H                                                                                                     | -2.70453300 | -0.76393900 | -0.19820000 |
| C                                                                                          | -2.04688100 | -0.11747300 | 0.00013500  | C                                                                                                     | -0.43974700 | 1.18540100  | -0.67809400 |
| H                                                                                          | -2.07026000 | -0.76890200 | -0.88059500 | H                                                                                                     | -1.13825200 | 0.87027400  | -1.46583000 |
| H                                                                                          | -2.07012800 | -0.76832900 | 0.88128400  | H                                                                                                     | 0.34932200  | 1.77593100  | -1.16612600 |
| H                                                                                          | -2.96512900 | 0.48259900  | 0.00000200  | C                                                                                                     | -1.20269300 | 2.11656400  | 0.30407500  |
| B                                                                                          | 0.59316400  | 0.00368400  | -0.00003600 | H                                                                                                     | -1.61747200 | 2.98689100  | -0.21892100 |
| O                                                                                          | 0.62706600  | -1.36446800 | -0.00008500 | H                                                                                                     | -2.03773100 | 1.59646400  | 0.78961800  |
| H                                                                                          | 1.53646100  | -1.70375700 | 0.00022600  | H                                                                                                     | -0.54415100 | 2.49444800  | 1.09649700  |
| O                                                                                          | 1.81360600  | 0.65242800  | 0.00008200  | HC≡C-BF <sub>2</sub> SCF energy=-301.4515863                                                          |             |             |             |
| H                                                                                          | 1.74656800  | 1.61728100  | 0.00032200  | B                                                                                                     | -0.00002900 | -0.47023800 | 0.00000000  |
| (H <sub>3</sub> C) <sub>3</sub> C-B(OH) <sub>2</sub> SCF energy=-334.4954048               |             |             |             | F                                                                                                     | -0.00002900 | -1.15888700 | -1.13624300 |
| C                                                                                          | 0.61906300  | 0.00265400  | 0.00002600  | F                                                                                                     | -0.00002900 | -1.15888700 | 1.13624300  |
| C                                                                                          | 1.10455700  | 0.76161800  | -1.25951100 | C                                                                                                     | 0.00009800  | 1.04981900  | 0.00000000  |
| H                                                                                          | 0.80290200  | 0.25112300  | -2.18392900 | C                                                                                                     | 0.00001700  | 2.26330700  | 0.00000000  |
| H                                                                                          | 0.69853000  | 1.77840300  | -1.29254100 | H                                                                                                     | -0.00001500 | 3.33239200  | 0.00000000  |
| H                                                                                          | 2.20179500  | 0.83337600  | -1.26560900 | HC≡C-BCl <sub>2</sub> SCF energy=-1022.1357                                                           |             |             |             |
| C                                                                                          | 1.22994000  | -1.41450000 | 0.00017000  | B                                                                                                     | -0.02110500 | 0.00043000  | -0.00019900 |
| H                                                                                          | 2.32735800  | -1.36396200 | 0.00010300  | C                                                                                                     | -1.52873300 | 0.00276000  | -0.00016400 |
| H                                                                                          | 0.94066200  | -1.99001100 | 0.89125500  | C                                                                                                     | -2.74457200 | 0.00441000  | 0.00010300  |
| H                                                                                          | 0.94050300  | -1.99020900 | -0.89071600 | H                                                                                                     | -3.81358200 | 0.00581100  | 0.00021400  |
| C                                                                                          | 1.10460000  | 0.76196900  | 1.25931100  | Cl                                                                                                    | 0.86619600  | -1.52049700 | 0.00003400  |
| H                                                                                          | 0.69837800  | 1.77867900  | 1.29207500  | Cl                                                                                                    | 0.87256500  | 1.51749800  | 0.00003400  |
| H                                                                                          | 0.80316300  | 0.25165700  | 2.18390000  | (H <sub>3</sub> C) <sub>3</sub> C-B(OH) <sub>2</sub> CH <sub>3</sub> SCF energy=-298.51686            |             |             |             |
| H                                                                                          | 2.20182400  | 0.83392800  | 1.26522900  | B                                                                                                     | 0.93785900  | -0.16663600 | -0.04077700 |
| B                                                                                          | -0.97818200 | -0.02389700 | -0.00000100 | C                                                                                                     | -0.64513400 | 0.04721800  | -0.01515400 |
| O                                                                                          | -1.65503000 | 1.16861800  | -0.00000300 | C                                                                                                     | -1.40579900 | -1.18495800 | -0.54799400 |
| H                                                                                          | -2.61694600 | 1.04095000  | 0.00002000  | H                                                                                                     | -1.15061700 | -2.09055800 | 0.01261200  |
| O                                                                                          | -1.74789400 | -1.16724300 | 0.00003100  | H                                                                                                     | -2.49215700 | -1.03178700 | -0.47185200 |
| H                                                                                          | -1.23283300 | -1.98589700 | 0.00001600  | C <sub>4</sub> H <sub>9</sub> -B(OH) <sub>2</sub> SCF energy=-334.491898                              |             |             |             |

|                                                                                                         |             |             |             |
|---------------------------------------------------------------------------------------------------------|-------------|-------------|-------------|
| C                                                                                                       | -0.37652600 | 0.71065500  | -0.00016800 |
| H                                                                                                       | -0.33307100 | 1.38482800  | -0.87304700 |
| H                                                                                                       | -0.33298800 | 1.38518500  | 0.87242400  |
| C                                                                                                       | 0.86209800  | -0.20213300 | -0.00001300 |
| H                                                                                                       | 0.82537200  | -0.86513100 | 0.87551200  |
| H                                                                                                       | 0.82532600  | -0.86548100 | -0.87527100 |
| C                                                                                                       | 2.19060600  | 0.56637000  | -0.00024100 |
| H                                                                                                       | 2.22715400  | 1.22707100  | -0.87953400 |
| H                                                                                                       | 2.22700600  | 1.22783400  | 0.87848500  |
| C                                                                                                       | 3.41985500  | -0.35033100 | 0.00026900  |
| H                                                                                                       | 4.35223800  | 0.22746100  | -0.00027300 |
| H                                                                                                       | 3.42976700  | -0.99877900 | 0.88590000  |
| H                                                                                                       | 3.42954900  | -1.00007200 | -0.88441900 |
| B                                                                                                       | -1.78008600 | -0.02309100 | -0.00002400 |
| O                                                                                                       | -2.98355400 | 0.65641200  | 0.00022700  |
| H                                                                                                       | -2.89182800 | 1.61930200  | 0.00053500  |
| O                                                                                                       | -1.84974900 | -1.39006800 | -0.00014700 |
| H                                                                                                       | -2.76785600 | -1.70488500 | 0.00008500  |
| C <sub>3</sub> H <sub>7</sub> -B-OH<br>C <sub>2</sub> H <sub>5</sub> SCF energy=-298.5110754            |             |             |             |
| B                                                                                                       | 0.61106100  | 0.06229500  | 0.00014900  |
| C                                                                                                       | 1.91067300  | -0.84356100 | 0.00044900  |
| H                                                                                                       | 1.85185500  | -1.52323400 | -0.86652300 |
| H                                                                                                       | 1.85227700  | -1.52174000 | 0.86863300  |
| C                                                                                                       | 3.26365300  | -0.11319700 | -0.00046400 |
| H                                                                                                       | 4.10424900  | -0.81864200 | -0.00004200 |
| H                                                                                                       | 3.36722800  | 0.53051500  | -0.88163600 |
| H                                                                                                       | 3.36759400  | 0.53203800  | 0.87954500  |
| O                                                                                                       | 0.79415200  | 1.42138000  | 0.00014500  |
| H                                                                                                       | -0.03567900 | 1.92291700  | 0.00003800  |
| C                                                                                                       | -0.84848500 | -0.57631600 | -0.00008700 |
| H                                                                                                       | -0.92419300 | -1.25195600 | -0.86893500 |
| H                                                                                                       | -0.92429700 | -1.25251800 | 0.86831200  |
| C                                                                                                       | -2.04977300 | 0.38559100  | 0.00013200  |
| H                                                                                                       | -1.99952200 | 1.04352600  | 0.88187800  |
| H                                                                                                       | -1.99939400 | 1.04408000  | -0.88119500 |
| C                                                                                                       | -3.40866600 | -0.32661500 | -0.00021000 |
| H                                                                                                       | -4.23985000 | 0.38931100  | -0.00003100 |
| H                                                                                                       | -3.51653700 | -0.96581300 | -0.88573000 |
| H                                                                                                       | -3.51666500 | -0.96640500 | 0.88486500  |
| (H <sub>3</sub> C) <sub>2</sub> HC-BH <sub>2</sub> SCF energy=-144.556945                               |             |             |             |
| B                                                                                                       | 0.76119900  | 1.43461100  | 0.00000000  |
| H                                                                                                       | 1.10134700  | 1.94696900  | 1.02995700  |
| H                                                                                                       | 1.10134700  | 1.94696900  | -1.02995700 |
| C                                                                                                       | -0.20362700 | 0.20873900  | 0.00000000  |
| H                                                                                                       | -1.15810800 | 0.79158600  | 0.00000000  |
| C                                                                                                       | -0.20362700 | -0.65275400 | 1.27776300  |
| H                                                                                                       | -0.27032400 | -0.03547200 | 2.18102600  |
| H                                                                                                       | -1.04232600 | -1.36136000 | 1.28708200  |
| H                                                                                                       | 0.71999900  | -1.24214800 | 1.34834600  |
| C                                                                                                       | -0.20362700 | -0.65275400 | -1.27776300 |
| H                                                                                                       | -1.04232600 | -1.36136000 | -1.28708200 |
| H                                                                                                       | -0.27032400 | -0.03547200 | -2.18102600 |
| H                                                                                                       | 0.71999900  | -1.24214800 | -1.34834600 |
| H <sub>3</sub> C-BH-OH SCF energy=-141.245016                                                           |             |             |             |
| B                                                                                                       | -0.13109300 | 0.49241800  | -0.00009800 |
| H                                                                                                       | -0.30219300 | 1.68600700  | 0.00010200  |
| C                                                                                                       | 1.30092800  | -0.14596900 | -0.00000500 |
| H                                                                                                       | 1.87308100  | 0.19553300  | 0.87547700  |
| H                                                                                                       | -1.17151800 | -1.37698600 | -1.60293400 |
| C                                                                                                       | 1.98176900  | 1.02997800  | -0.02988000 |
| H                                                                                                       | 1.69633000  | 1.82974500  | 0.66586200  |
| H                                                                                                       | 3.00751600  | 0.72363400  | 0.21976700  |
| H                                                                                                       | 2.02074700  | 1.50113200  | -1.02386500 |
| O                                                                                                       | 1.38078300  | -1.46586100 | -0.04502900 |
| H                                                                                                       | 2.34608800  | -1.54383600 | -0.01198300 |
| C                                                                                                       | -1.03359000 | 0.26838900  | 1.47265200  |
| H                                                                                                       | -0.53588900 | 1.14722200  | 1.90314400  |
| H                                                                                                       | -2.11784100 | 0.42988800  | 1.56151700  |
| H                                                                                                       | -0.77819700 | -0.60138400 | 2.09123600  |
| C                                                                                                       | -1.06566300 | 1.29390400  | -0.82507200 |
| H                                                                                                       | -0.58255100 | 2.20745500  | -0.45701800 |
| H                                                                                                       | -0.81456700 | 1.19038500  | -1.88927500 |
| H                                                                                                       | -2.15240400 | 1.44797400  | -0.76040900 |
| (H <sub>3</sub> C) <sub>2</sub> C=CH-BH <sub>2</sub> SCF energy=-182.6603762                            |             |             |             |
| B                                                                                                       | 2.24738400  | -0.09727500 | 0.00014700  |
| H                                                                                                       | 2.43525300  | 1.08573200  | 0.00056700  |
| C                                                                                                       | 0.84433000  | -0.71095300 | -0.00022300 |
| C                                                                                                       | -0.34856500 | -0.04746900 | -0.00002000 |
| H                                                                                                       | 3.20837200  | -0.81347200 | 0.00007600  |
| C                                                                                                       | -1.65986500 | -0.79248700 | 0.00011200  |
| H                                                                                                       | -1.51800800 | -1.87716300 | -0.00068000 |
| H                                                                                                       | -2.25990500 | -0.51985200 | 0.88000300  |
| H                                                                                                       | -2.26096400 | -0.51860300 | -0.87864600 |
| H                                                                                                       | 0.76110600  | -1.80113200 | -0.00043400 |
| C                                                                                                       | -0.49225000 | 1.45207400  | -0.00004600 |
| H                                                                                                       | -1.06687700 | 1.77723700  | 0.87862900  |
| H                                                                                                       | 0.46751600  | 1.96950500  | 0.00066200  |
| H                                                                                                       | -1.06531300 | 1.77713900  | -0.87983900 |
| H <sub>3</sub> CH <sub>2</sub> CH <sub>2</sub> C-BH <sub>2</sub> SCF energy=-144.557365                 |             |             |             |
| B                                                                                                       | 2.14283700  | 0.12802600  | 0.00859100  |
| H                                                                                                       | 3.08158000  | -0.61329200 | -0.07830000 |
| H                                                                                                       | 2.35888900  | 1.30191400  | 0.13407200  |
| C                                                                                                       | 0.69303000  | -0.45212500 | -0.00588300 |
| H                                                                                                       | 0.60721200  | -1.19171000 | -0.82174900 |
| H                                                                                                       | 0.63241000  | -1.08600500 | 0.90288900  |
| C                                                                                                       | -0.48841700 | 0.53161100  | -0.03765800 |
| H                                                                                                       | -0.39394100 | 1.23617900  | 0.80046400  |
| H                                                                                                       | -0.42496400 | 1.14181300  | -0.94975700 |
| C                                                                                                       | -1.85981700 | -0.15159700 | 0.02050900  |
| H                                                                                                       | -1.97054500 | -0.73924100 | 0.94151200  |
| H                                                                                                       | -2.67640700 | 0.58038600  | -0.00808600 |
| H                                                                                                       | -1.99719300 | -0.83750700 | -0.82581000 |
| H <sub>3</sub> C(H <sub>2</sub> C) <sub>4</sub> H <sub>2</sub> C-BH <sub>2</sub> SCF energy=-262.499149 |             |             |             |
| B                                                                                                       | -4.06238600 | -0.34913400 | 0.01639900  |
| H                                                                                                       | -5.09288000 | 0.25775800  | -0.07225300 |
| H                                                                                                       | -4.11779600 | -1.54046100 | 0.15019800  |
| C                                                                                                       | -2.70492300 | 0.42203800  | -0.01037400 |
| H                                                                                                       | -2.72195800 | 1.14826800  | -0.84248900 |
| H                                                                                                       | -2.72976800 | 1.07812000  | 0.88375200  |
| C                                                                                                       | -1.40144300 | -0.39362200 | -0.02717200 |
| H                                                                                                       | -1.39673700 | -1.08556700 | 0.82771600  |
| H                                                                                                       | -1.38360900 | -1.02858500 | -0.92534000 |
| C                                                                                                       | -0.12971500 | 0.46513800  | 0.00730400  |
| H                                                                                                       | -0.14588100 | 1.09824600  | 0.90825400  |
| H                                                                                                       | -0.13765900 | 1.15731600  | -0.84903700 |
| C                                                                                                       | 1.16861600  | -0.35278700 | -0.01439200 |
| H                                                                                                       | 1.18458100  | -0.98497300 | -0.91560000 |
| H                                                                                                       | 1.17648000  | -1.04450100 | 0.84204400  |
| C                                                                                                       | 2.43998500  | 0.50673000  | 0.02071100  |

|                                                                               |             |             |             |                                                                                                                  |             |             |             |
|-------------------------------------------------------------------------------|-------------|-------------|-------------|------------------------------------------------------------------------------------------------------------------|-------------|-------------|-------------|
| H                                                                             | 1.28664600  | -1.24191300 | -0.00024900 | H                                                                                                                | 2.43341100  | 1.19749500  | 0.83518500  |
| H                                                                             | 1.87377400  | 0.19581200  | -0.87494800 | H                                                                                                                | 2.42531700  | 1.13755800  | 0.92164500  |
| O                                                                             | -1.22696200 | -0.32282900 | 0.00003200  | C                                                                                                                | 3.73128700  | -0.32007900 | -0.00162000 |
| H                                                                             | -2.06571400 | 0.16091900  | -0.00012500 | H                                                                                                                | 3.79280900  | -0.93468900 | -0.90908300 |
| (H <sub>3</sub> C) <sub>2</sub> HC-BH-OH SCF energy=-219.8694666              |             |             |             | H                                                                                                                | 4.61962000  | 0.32262400  | 0.02599600  |
| B                                                                             | 0.97040700  | -0.00055600 | 0.44686400  | H                                                                                                                | 3.78315500  | -0.99743900 | 0.86064700  |
| H                                                                             | 1.02715800  | -0.00139300 | 1.65236600  | $\begin{array}{c} \text{CH}_3 \\   \\ \text{C}_2\text{H}_5-\text{C}-\text{BH}_2 \\   \\ \text{CH}_3 \end{array}$ |             |             |             |
| C                                                                             | -0.40911400 | -0.00000100 | -0.31334600 | SCF energy=-223.1868666                                                                                          |             |             |             |
| H                                                                             | -0.21905500 | 0.00010600  | -1.39708800 | B                                                                                                                | -1.68380800 | -0.64268400 | -0.88561500 |
| O                                                                             | 2.13535600  | -0.00001500 | -0.26470500 | H                                                                                                                | -2.75420800 | -0.10219600 | -0.90911400 |
| H                                                                             | 2.92848300  | -0.00030900 | 0.29108400  | H                                                                                                                | -1.58295200 | -1.73141200 | -1.37873900 |
| C                                                                             | -1.21882700 | -1.26884800 | 0.03738700  | C                                                                                                                | -0.47837500 | 0.00519700  | -0.11992200 |
| H                                                                             | -1.41930100 | -1.32891800 | 1.11553000  | C                                                                                                                | 0.89352300  | -0.46557700 | -0.67707700 |
| H                                                                             | -2.18898400 | -1.26842800 | -0.47814600 | H                                                                                                                | 0.98395600  | -0.11130400 | -1.71490000 |
| H                                                                             | -0.69129200 | -2.18587100 | -0.25450900 | C                                                                                                                | 2.14688200  | -0.02135200 | 0.09363100  |
| C                                                                             | -1.21797200 | 1.26931300  | 0.03766400  | H                                                                                                                | 3.04740000  | -0.42078400 | -0.38869200 |
| H                                                                             | -2.18820700 | 1.26948900  | -0.47772400 | H                                                                                                                | 2.24917200  | 1.06965600  | 0.12128400  |
| H                                                                             | -1.41831200 | 1.32944500  | 1.11583800  | H                                                                                                                | 2.14552400  | -0.38340000 | 1.12869100  |
| H                                                                             | -0.68989300 | 2.18600100  | -0.25426300 | C                                                                                                                | -0.57078200 | 1.54356700  | -0.04317900 |
| H <sub>2</sub> C=CH-BH <sub>2</sub> SCF energy=-104.0243734                   |             |             |             | H                                                                                                                | -1.56343500 | 1.86163200  | 0.29726000  |
| B                                                                             | -1.35553400 | 0.20777900  | -0.00008900 | H                                                                                                                | 0.16724900  | 1.96564400  | 0.65163700  |
| H                                                                             | -1.40432500 | 1.40548700  | 0.00012400  | H                                                                                                                | -0.39717600 | 2.00193400  | -1.02584700 |
| C                                                                             | 0.02223100  | -0.48586300 | -0.00000500 | C                                                                                                                | -0.72725600 | -0.59123500 | 1.30556500  |
| C                                                                             | 1.16796800  | 0.22952500  | 0.00001900  | H                                                                                                                | -1.72740500 | -0.34567700 | 1.68645900  |
| H                                                                             | 1.14867800  | 1.31851200  | -0.00000300 | H                                                                                                                | -0.61219800 | -1.68233500 | 1.32508500  |
| H                                                                             | 2.15605000  | -0.23091800 | 0.00007900  | H                                                                                                                | -0.00587400 | -0.16905300 | 2.01724400  |
| H                                                                             | -2.37492700 | -0.41956500 | 0.00012800  | H                                                                                                                | 0.88503600  | -1.56288100 | -0.73640000 |
| H                                                                             | 0.11100000  | -1.57438100 | 0.00003400  | (H <sub>3</sub> C) <sub>3</sub> C-CH-BH <sub>2</sub>                                                             |             |             |             |
| (H <sub>3</sub> C) <sub>2</sub> HC-CH-BH <sub>2</sub> SCF energy=-223.1882981 |             |             |             | $\begin{array}{c} \text{CH}_3 \\   \\ \text{CH}_3 \\   \\ \text{CH}_3 \end{array}$                               |             |             |             |
| B                                                                             | 1.56073500  | 1.36165900  | -0.06983400 | SCF energy=-262.5040402                                                                                          |             |             |             |
| H                                                                             | 2.37472900  | 1.83458600  | 0.67245400  | B                                                                                                                | 1.68504800  | 1.36812000  | -0.03669900 |
| H                                                                             | 1.47845200  | 1.80895100  | -1.18089800 | H                                                                                                                | 2.62524200  | 1.72326800  | -0.69088500 |
| C                                                                             | 0.72246800  | 0.10589100  | 0.34257000  | H                                                                                                                | 1.46842700  | 1.95390500  | 0.98597600  |
| H                                                                             | 0.60417200  | 0.04763800  | 1.43640600  | C                                                                                                                | 0.87372500  | 0.10024000  | -0.47269400 |
| C                                                                             | -0.67618800 | 0.00173800  | -0.31273400 | C                                                                                                                | -0.61541900 | -0.00213700 | -0.00638800 |
| H                                                                             | -0.53163500 | 0.02232300  | -1.40471400 | C                                                                                                                | -1.30003500 | -1.22267100 | -0.65833700 |
| C                                                                             | -1.41879000 | -1.29636600 | 0.04461100  | H                                                                                                                | -2.36493800 | -1.25684700 | -0.39441700 |
| H                                                                             | -2.41753300 | -1.31168500 | -0.40979800 | H                                                                                                                | -1.23051800 | -1.17740100 | -1.75329800 |
| H                                                                             | -0.88804900 | -2.18943700 | -0.30398200 | H                                                                                                                | -0.85415100 | -2.16978300 | -0.33226500 |
| H                                                                             | -1.54906000 | -1.38589900 | 1.13220500  | H                                                                                                                | 0.87146800  | 0.03321300  | -1.57261500 |
| C                                                                             | -1.53215900 | 1.22166400  | 0.06912000  | C                                                                                                                | -1.34935800 | 1.27118100  | -0.47908600 |
| H                                                                             | -1.69507400 | 1.26065000  | 1.15504500  | H                                                                                                                | -0.93097200 | 2.17112400  | -0.00893400 |
| H                                                                             | -1.05023500 | 2.16199400  | -0.23070800 | H                                                                                                                | -1.27280900 | 1.39159800  | -1.56801100 |
| H                                                                             | -2.51695800 | 1.18758700  | -0.41334600 | H                                                                                                                | -2.41612000 | 1.23183200  | -0.22296600 |
| C                                                                             | 1.67698300  | -1.05909000 | -0.07280200 | C                                                                                                                | -0.74448800 | -0.11620700 | 1.52572300  |
| H                                                                             | 2.68727700  | -0.93335600 | 0.33789700  | H                                                                                                                | -1.80242100 | -0.12058600 | 1.81809800  |
| H                                                                             | 1.30158600  | -2.01961500 | 0.29812800  | H                                                                                                                | -0.29820000 | -1.04394900 | 1.90310600  |
| H                                                                             | 1.76476700  | -1.13505100 | -1.16410900 | H                                                                                                                | -0.26311900 | 0.72417000  | 2.03860900  |
| H <sub>3</sub> C-C≡C-B(OH) <sub>2</sub> SCF energy=-292.7252471               |             |             |             | C                                                                                                                | 1.79430200  | -1.06372100 | 0.01905500  |
| C                                                                             | 1.57505200  | -0.01778600 | -0.00179400 | H                                                                                                                | 1.35810200  | -2.03796900 | -0.23038000 |
| C                                                                             | 0.35775000  | -0.03600600 | -0.00124400 | H                                                                                                                | 2.77846300  | -1.01813800 | -0.46203300 |
| B                                                                             | -1.17302000 | -0.01950000 | -0.00009100 | H                                                                                                                | 1.95394700  | -1.04514600 | 1.10387500  |
| O                                                                             | -1.86942100 | -1.19434700 | 0.00032400  | C                                                                                                                | 3.26983300  | 0.21253800  | -0.00178100 |
| H                                                                             | -2.82768100 | -1.04015700 | 0.00090400  | H                                                                                                                | 3.36116800  | 1.19074300  | 0.46384700  |
| C                                                                             | 3.03491900  | -0.02044600 | 0.00005600  | H                                                                                                                | 4.18012200  | -0.26285800 | -0.35549100 |
| H                                                                             | 3.43607000  | 0.83839800  | -0.55150000 | C                                                                                                                | 1.97034400  | -0.52186800 | 0.01866100  |
| H                                                                             | 3.42209000  | 0.02936300  | 1.02523200  | H                                                                                                                | 1.93663700  | -1.24388400 | -0.81112700 |
|                                                                               |             |             |             | H                                                                                                                | 1.89995500  | -1.13797300 | 0.93688500  |
|                                                                               |             |             |             | C                                                                                                                | 0.73549400  | 0.39553600  | -0.04152700 |
|                                                                               |             |             |             | H                                                                                                                | 0.77619700  | 0.99049200  | -0.96515100 |
|                                                                               |             |             |             | H                                                                                                                | 0.78354400  | 1.11472800  | 0.78994300  |
|                                                                               |             |             |             | C                                                                                                                | -0.59475500 | -0.36637100 | 0.02047800  |



|   |             |             |             |
|---|-------------|-------------|-------------|
| H | 3.42710400  | -0.93443000 | -0.46187300 |
| O | -1.88921300 | 1.15725200  | 0.00025000  |
| H | -1.32973000 | 1.94651200  | 0.00099800  |

(H<sub>3</sub>C)<sub>2</sub>N-C≡C-B(OH)<sub>2</sub> SCF energy=-387.3864165

|   |             |             |             |
|---|-------------|-------------|-------------|
| C | -0.60632600 | 0.00586000  | -0.11371800 |
| C | 0.61831900  | -0.01436600 | -0.05896500 |
| B | 2.13205200  | -0.01817100 | 0.00342400  |
| O | 2.82057900  | -1.20386800 | 0.04134900  |
| H | 3.77767400  | -1.05016600 | 0.07727300  |
| O | 2.87709600  | 1.14757900  | 0.02626000  |
| H | 2.33534700  | 1.94792700  | -0.00698600 |
| N | -1.93623600 | -0.00315300 | -0.21112400 |
| C | -2.63878600 | -1.25757800 | 0.07147700  |
| H | -3.60984200 | -1.24555400 | -0.43492200 |
| H | -2.04888300 | -2.09310000 | -0.31021900 |
| H | -2.80171900 | -1.39859400 | 1.15133400  |
| C | -2.66762400 | 1.22758900  | 0.09362700  |
| H | -2.10508000 | 2.08461000  | -0.28279100 |
| H | -3.64235500 | 1.19777600  | -0.40485800 |
| H | -2.82664700 | 1.35130900  | 1.17651500  |

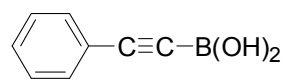

SCF energy=-484.4909988

|   |             |             |             |
|---|-------------|-------------|-------------|
| C | 0.46252200  | 0.00283500  | 0.00030200  |
| C | 1.68272800  | -0.02512800 | 0.00045100  |
| B | 3.21317200  | -0.02104200 | 0.00004400  |
| O | 3.89557000  | -1.20391600 | -0.00055200 |
| H | 4.85569300  | -1.06272100 | -0.00078000 |
| O | 3.93891200  | 1.14914800  | 0.00014600  |
| H | 3.38945100  | 1.94543100  | 0.00055100  |
| C | -0.96560600 | 0.00227400  | 0.00013000  |
| C | -1.67437000 | -1.21670800 | 0.00024600  |
| C | -1.68653400 | 1.21365600  | -0.00013600 |
| C | -3.06825000 | -1.21878700 | 0.00009100  |
| H | -1.12035600 | -2.15063700 | 0.00045500  |
| C | -3.08049200 | 1.20263600  | -0.00029400 |
| H | -1.14383300 | 2.15446600  | -0.00022200 |
| C | -3.77499200 | -0.01156400 | -0.00018100 |
| H | -3.60460400 | -2.16406800 | 0.00018300  |
| H | -3.62625000 | 2.14254800  | -0.00050600 |
| H | -4.86185500 | -0.01695100 | -0.00030300 |

Cl-C≡C-B(OH)<sub>2</sub> SCF energy=-713.0142443

|    |             |             |             |
|----|-------------|-------------|-------------|
| C  | -1.06736500 | -0.01597900 | -0.00000100 |
| C  | 0.14826600  | -0.03873900 | -0.00000200 |
| B  | 1.68273600  | -0.01835900 | -0.00000100 |
| O  | 2.39151600  | 1.15889900  | -0.00000200 |
| H  | 1.83711700  | 1.95186800  | 0.00001500  |
| O  | 2.36914900  | -1.19568900 | 0.00000000  |
| H  | 3.32932800  | -1.05370200 | 0.00000900  |
| Cl | -2.71475600 | -0.01080900 | 0.00000100  |

NC-C≡C-B(OH)<sub>2</sub> SCF energy=-345.6516774

|   |             |             |             |
|---|-------------|-------------|-------------|
| C | -1.19871400 | -0.03091600 | 0.00004400  |
| C | 0.02008300  | -0.04771400 | 0.00009600  |
| B | 1.56529200  | -0.01495500 | 0.00008800  |
| O | 2.23669200  | -1.19443600 | -0.00004000 |
| H | 3.20019300  | -1.07408200 | -0.00010900 |
| O | 2.25447900  | 1.16649000  | -0.00005200 |
| H | 1.70612900  | 1.96400600  | 0.00001200  |
| C | -2.57063700 | -0.01811900 | -0.00001100 |

|   |             |             |             |
|---|-------------|-------------|-------------|
| H | -0.63085400 | -0.96196200 | 0.94576400  |
| H | -0.63915600 | -1.08908800 | -0.80880900 |
| C | -1.82770700 | 0.54597800  | -0.04040400 |
| H | -1.79270400 | 1.14000500  | -0.96532800 |
| H | -1.78438900 | 1.26821900  | 0.78790900  |
| C | -3.15338700 | -0.22224900 | 0.02221800  |
| H | -3.23496100 | -0.79752800 | 0.95355900  |
| H | -4.01282800 | 0.45743400  | -0.02540400 |
| H | -3.24166300 | -0.92971700 | -0.81246700 |

H<sub>3</sub>C-C≡C-BF<sub>3</sub>Na SCF energy=-603.025059

|    |             |             |             |
|----|-------------|-------------|-------------|
| C  | 2.42719100  | 0.00065600  | -0.00073000 |
| C  | 1.21139600  | -0.00017400 | -0.00151100 |
| B  | -0.33923100 | -0.00076500 | -0.00017300 |
| F  | -0.95329800 | -0.61841000 | 1.16012700  |
| F  | -0.95567000 | 1.31287200  | -0.04492400 |
| F  | -0.95606900 | -0.69649300 | -1.11468600 |
| Na | -2.77637600 | 0.00125400  | 0.00054500  |
| C  | 3.88879600  | 0.00055200  | 0.00025600  |
| H  | 4.28620900  | 0.93057700  | -0.42556400 |
| H  | 4.28481900  | -0.09487900 | 1.01923000  |
| H  | 4.28629600  | -0.83359100 | -0.59153300 |

(H<sub>3</sub>C)<sub>2</sub>N-C≡C-BF<sub>3</sub>Na SCF energy=-697.6821603

|    |             |             |             |
|----|-------------|-------------|-------------|
| C  | 1.53381000  | -0.00617500 | -0.17347800 |
| C  | 0.31519400  | -0.00999300 | -0.10662600 |
| B  | -1.22675900 | -0.00768500 | -0.03301400 |
| F  | -1.82394400 | 1.30475300  | 0.14750800  |
| F  | -1.92120800 | -0.52828000 | -1.20259100 |
| F  | -1.80597700 | -0.78874100 | 1.05157300  |
| Na | -3.65988900 | 0.01549700  | 0.09518400  |
| N  | 2.88006900  | 0.00009200  | -0.28010700 |
| C  | 3.56360400  | -1.22979200 | 0.12459800  |
| H  | 3.04675400  | -2.08816200 | -0.31076200 |
| H  | 4.59203200  | -1.20670100 | -0.25239100 |
| H  | 3.58922700  | -1.34987600 | 1.22105400  |
| C  | 3.55124000  | 1.23745800  | 0.12252100  |
| H  | 4.57967900  | 1.22439400  | -0.25492000 |
| H  | 3.02531300  | 2.08992900  | -0.31353000 |
| H  | 3.57615800  | 1.35914600  | 1.21884300  |

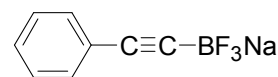

SCF energy=-794.7918993

|    |             |             |             |
|----|-------------|-------------|-------------|
| C  | -0.52871900 | -0.00066000 | -0.00118000 |
| C  | 0.68972800  | -0.00108000 | -0.00297000 |
| B  | 2.24340700  | -0.00064400 | -0.00155100 |
| F  | 2.85390500  | 1.03101500  | -0.81447100 |
| F  | 2.85254400  | 0.18935000  | 1.29943600  |
| F  | 2.85356800  | -1.22146200 | -0.48614700 |
| Na | 4.68146600  | 0.00129500  | 0.00276900  |
| C  | -1.95864200 | -0.00031200 | -0.00044100 |
| C  | -2.67728200 | -1.21320600 | -0.00014900 |
| C  | -2.67643200 | 1.21310300  | -0.00016200 |
| C  | -4.07183200 | -1.20873700 | 0.00071500  |
| H  | -2.12949200 | -2.15106600 | -0.00058000 |
| C  | -4.07097600 | 1.20966400  | 0.00063300  |
| H  | -2.12795600 | 2.15055900  | -0.00064000 |
| C  | -4.77447400 | 0.00071500  | 0.00112400  |
| H  | -4.61204500 | -2.15230600 | 0.00104200  |
| H  | -4.61049700 | 2.15363100  | 0.00085900  |
| H  | -5.86155300 | 0.00110500  | 0.00182600  |

NC-C≡C-BF<sub>3</sub>Na SCF energy=-655.9597341



|   |            |             |             |
|---|------------|-------------|-------------|
| O | 1.09345300 | -1.52436300 | -0.00049000 |
| O | 2.82237400 | -0.11823200 | 0.00047900  |
| H | 3.26366100 | -0.98789300 | 0.00032500  |

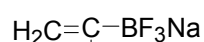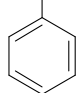

SCF energy=-796.026522

|    |             |             |             |
|----|-------------|-------------|-------------|
| C  | -0.87494500 | 1.39623600  | 1.42305600  |
| H  | -1.90972900 | 1.49741900  | 1.74884600  |
| C  | -0.48099500 | 0.34052900  | 0.67189200  |
| B  | -1.58171800 | -0.72642000 | 0.10030800  |
| F  | -1.43382300 | -2.03980600 | 0.48053400  |
| F  | -2.91925200 | -0.24283600 | 0.42738900  |
| F  | -1.55376200 | -0.60571600 | -1.36673700 |
| Na | -2.41969900 | 1.37828900  | -0.99862200 |
| H  | -0.17472000 | 2.12477400  | 1.83077000  |
| C  | 0.95531000  | 0.18298100  | 0.30363800  |
| C  | 1.52579500  | -1.09989900 | 0.19909000  |
| C  | 1.78622200  | 1.29413000  | 0.05920800  |
| C  | 2.87881700  | -1.26038800 | -0.10697700 |
| H  | 0.90424400  | -1.97206100 | 0.37198700  |
| C  | 3.13632800  | 1.13418000  | -0.25487500 |
| H  | 1.36742900  | 2.29696700  | 0.10364700  |
| C  | 3.69116400  | -0.14677400 | -0.33592800 |
| H  | 3.29744400  | -2.26188200 | -0.17073000 |
| H  | 3.75357000  | 2.00939300  | -0.44455000 |
| H  | 4.74239600  | -0.27443700 | -0.58197600 |

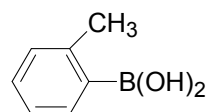

SCF energy=-447.6341618

|   |             |             |             |
|---|-------------|-------------|-------------|
| C | 1.96235700  | -1.49267200 | -0.14295200 |
| C | 0.56760200  | -1.45225400 | -0.13265900 |
| C | -0.15338400 | -0.24586000 | -0.02550000 |
| C | 0.58124400  | 0.96497800  | 0.07732400  |
| C | 1.98275300  | 0.91096100  | 0.07922300  |
| C | 2.67356600  | -0.29786200 | -0.03159200 |
| H | 2.48390900  | -2.44162300 | -0.23816300 |
| H | 0.02798300  | -2.39299500 | -0.23967300 |
| H | 2.54487900  | 1.83826800  | 0.16839100  |
| H | 3.76098900  | -0.30289900 | -0.03169400 |
| B | -1.72427700 | -0.32252700 | -0.02696500 |
| O | -2.48575200 | 0.72648100  | -0.47082000 |
| H | -3.43305800 | 0.52324300  | -0.41252700 |
| O | -2.41575500 | -1.43995200 | 0.39586200  |
| H | -1.85760700 | -2.13280100 | 0.77485000  |
| C | -0.09330400 | 2.31602100  | 0.18770500  |
| H | -0.63891000 | 2.56554700  | -0.72859700 |
| H | -0.82686700 | 2.34211700  | 1.00085300  |
| H | 0.64711400  | 3.10167800  | 0.37175000  |

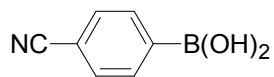

SCF energy=-500.5763613

|   |             |             |             |
|---|-------------|-------------|-------------|
| C | 1.19859300  | 1.22028900  | -0.00091100 |
| C | -0.19419600 | 1.21813000  | -0.00094400 |
| C | -0.93344400 | 0.02124200  | -0.00009900 |
| C | -0.21581700 | -1.19072000 | 0.00070800  |
| C | 1.17633100  | -1.21252100 | 0.00080200  |
| C | 1.89178800  | -0.00212900 | 0.00000100  |
| H | 1.75260700  | 2.15397100  | -0.00161500 |
| H | -0.70116700 | 2.18192100  | -0.00184100 |
| B | -2.50721500 | -0.00686500 | -0.00000900 |

|   |             |             |             |
|---|-------------|-------------|-------------|
| H | 1.10173600  | 2.54687100  | 0.17208600  |
| H | -0.75368600 | 2.57473300  | 0.17805100  |
| C | -1.12349900 | -0.08688900 | -0.02513500 |
| F | -1.17227100 | -1.08867800 | 0.91379600  |
| F | -2.22324800 | 0.67141600  | 0.16455100  |
| F | -1.27511300 | -0.71091200 | -1.22757200 |

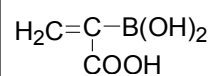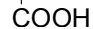

SCF energy=-443.2454103

|   |             |             |             |
|---|-------------|-------------|-------------|
| C | -0.05579000 | 0.57596900  | -0.00016400 |
| B | 1.35075800  | -0.15104900 | -0.00002400 |
| O | 2.46839700  | 0.64195000  | 0.00000700  |
| H | 3.28197200  | 0.11394400  | -0.00017300 |
| O | 1.48106000  | -1.50630000 | 0.00021600  |
| H | 0.60198500  | -1.93662900 | -0.00002000 |
| C | -0.15636100 | 1.91889700  | -0.00004200 |
| H | 0.74028300  | 2.53267600  | 0.00005100  |
| H | -1.11417100 | 2.43232800  | 0.00017100  |
| C | -1.27998500 | -0.26383100 | -0.00008300 |
| O | -1.26811800 | -1.49103000 | -0.00021400 |
| O | -2.44974600 | 0.41494400  | 0.00014700  |
| H | -3.16377600 | -0.24979500 | 0.00058100  |

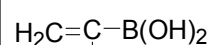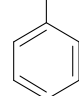

SCF energy=-485.7238447

|   |             |             |             |
|---|-------------|-------------|-------------|
| C | 0.99072000  | 0.62268300  | -0.27721400 |
| B | 2.16106100  | -0.35894300 | 0.12968500  |
| O | 2.04980500  | -1.70924500 | -0.06388900 |
| H | 2.84310300  | -2.18032900 | 0.23800300  |
| O | 3.34232200  | 0.09501300  | 0.67346500  |
| H | 3.34411500  | 1.04384700  | 0.86229100  |
| C | 1.32755800  | 1.82246600  | -0.79744600 |
| H | 2.36515600  | 2.12289600  | -0.93561400 |
| H | 0.58405600  | 2.53402200  | -1.15231400 |
| C | -0.44529100 | 0.25652600  | -0.10674000 |
| C | -0.90862300 | -1.04708900 | -0.36577400 |
| C | -1.38094100 | 1.21979700  | 0.31746400  |
| C | -2.26300400 | -1.36230900 | -0.23627800 |
| H | -0.20492500 | -1.81073600 | -0.67754000 |
| C | -2.73293200 | 0.90165400  | 0.45369600  |
| H | -1.03960400 | 2.22183200  | 0.56446100  |
| C | -3.18189100 | -0.39194400 | 0.17228200  |
| H | -2.59975400 | -2.37319000 | -0.45341500 |
| H | -3.43377800 | 1.66216300  | 0.78972600  |
| H | -4.23427000 | -0.64263800 | 0.27943500  |

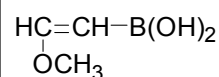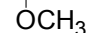

SCF energy=-369.1833673

|   |             |             |             |
|---|-------------|-------------|-------------|
| C | 0.86529500  | 0.68557100  | 0.00014500  |
| H | 0.57640600  | 1.73587700  | 0.00035600  |
| C | -0.03189500 | -0.31987600 | -0.00019800 |
| H | 0.32389900  | -1.34801400 | -0.00046600 |
| B | -1.56848700 | -0.10689400 | -0.00003900 |
| O | -2.36667700 | -1.22453500 | 0.00016100  |
| H | -3.30868000 | -0.99308300 | 0.00013900  |
| O | -2.22019200 | 1.11370200  | -0.00010400 |
| H | -1.64313500 | 1.88859200  | -0.00019100 |
| O | 2.21561700  | 0.61995700  | 0.00010100  |
| C | 2.81813300  | -0.67388500 | -0.00004800 |
| H | 3.89498600  | -0.49985700 | -0.00061200 |
| H | 2.53034400  | -1.23636000 | 0.89638600  |

|   |             |             |             |
|---|-------------|-------------|-------------|
| O | -3.30825300 | 1.10990500  | 0.00152200  |
| H | -2.84493600 | 1.95838100  | 0.00372400  |
| O | -3.12558700 | -1.22661200 | -0.00160300 |
| H | -4.09253200 | -1.15067200 | -0.00114300 |
| H | -0.76451600 | -2.12772500 | 0.00127100  |
| H | 1.71558100  | -2.15497200 | 0.00146800  |
| C | 3.32731300  | -0.01289700 | 0.00007900  |
| N | 4.49119300  | -0.02018600 | 0.00014500  |

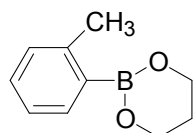

SCF energy=-564.3594424

|   |             |             |             |
|---|-------------|-------------|-------------|
| C | 0.81079800  | -0.18854600 | 0.02784800  |
| C | 1.67261200  | 0.94053500  | -0.00975400 |
| C | 3.05997600  | 0.73415900  | -0.05368200 |
| C | 3.61469000  | -0.54726600 | -0.06107500 |
| C | 2.77639000  | -1.66227400 | -0.02444800 |
| C | 1.39537700  | -1.47214000 | 0.01918900  |
| H | 3.71964500  | 1.59924600  | -0.08276700 |
| H | 4.69499200  | -0.66984800 | -0.09505500 |
| H | 3.19200000  | -2.66706700 | -0.02940300 |
| H | 0.73982900  | -2.33792800 | 0.04780000  |
| B | -0.75815700 | -0.12559200 | 0.08202500  |
| O | -1.41994900 | 1.07875900  | 0.11351900  |
| O | -1.44164200 | -1.32169500 | 0.09385700  |
| C | -2.85071300 | 1.13210200  | 0.16456700  |
| H | -3.15240700 | 2.05105600  | -0.34837400 |
| H | -3.15413000 | 1.21754200  | 1.21725300  |
| C | -2.87050400 | -1.35747100 | 0.14252300  |
| H | -3.17848600 | -1.45831600 | 1.19279700  |
| H | -3.18578400 | -2.26156000 | -0.38852200 |
| C | -3.47598500 | -0.10199600 | -0.47861900 |
| H | -3.28241000 | -0.09394500 | -1.55937000 |
| H | -4.56415700 | -0.09404400 | -0.33575300 |
| C | 1.16294500  | 2.36687700  | -0.00553400 |
| H | 0.50780400  | 2.56613100  | -0.86052800 |
| H | 0.57270900  | 2.58429700  | 0.89103900  |
| H | 2.00039700  | 3.07200200  | -0.04433900 |

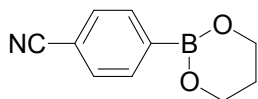

SCF energy=-617.30447

|   |             |             |             |
|---|-------------|-------------|-------------|
| C | 0.18428700  | -0.00001700 | 0.04652700  |
| C | 0.90802600  | -1.20692900 | 0.03003600  |
| C | 2.30037800  | -1.21736900 | -0.00283800 |
| C | 3.00421500  | 0.00000400  | -0.01940000 |
| C | 2.30036000  | 1.21736900  | -0.00283500 |
| C | 0.90800800  | 1.20691300  | 0.03007000  |
| B | -1.38519000 | 0.00000400  | 0.08590300  |
| O | -2.04042300 | 1.20384700  | 0.10057900  |
| O | -2.04048500 | -1.20375000 | 0.10091000  |
| C | -3.47400500 | 1.24900700  | 0.13636800  |
| H | -3.77614900 | 2.15756500  | -0.39333900 |
| H | -3.78634900 | 1.34724400  | 1.18477300  |
| C | -3.47404800 | -1.24909000 | 0.13613600  |
| H | -3.78678500 | -1.34780300 | 1.18437900  |
| H | -3.77587800 | -2.15747400 | -0.39405100 |
| C | -4.08093500 | 0.00003800  | -0.49804500 |
| H | -3.88061500 | 0.00016500  | -1.57750700 |
| H | -5.16997300 | 0.00003900  | -0.36356800 |
| H | 0.36768800  | -2.14932600 | 0.04334100  |
| H | 2.84865700  | -2.15468000 | -0.01549000 |
| H | 0.36765400  | 2.14929800  | 0.04331500  |

|   |            |             |             |
|---|------------|-------------|-------------|
| H | 2.52943000 | -1.23652600 | -0.89607500 |
|---|------------|-------------|-------------|

H<sub>2</sub>N-CH=CH-B(OH)<sub>2</sub> SCF energy=-310.0118784

|   |             |             |             |
|---|-------------|-------------|-------------|
| C | 1.44221100  | -0.26898400 | -0.02104500 |
| H | 1.33717200  | -1.35379000 | -0.07965400 |
| C | 0.35548200  | 0.53561700  | 0.02422800  |
| H | 0.52783700  | 1.61303900  | 0.07315700  |
| B | -1.10986600 | 0.05059500  | 0.00488600  |
| O | -2.10910100 | 0.99608300  | -0.02599000 |
| H | -2.98734700 | 0.58478400  | -0.03055000 |
| O | -1.52735500 | -1.27313100 | 0.01089800  |
| H | -0.81368200 | -1.92159200 | 0.06966700  |
| N | 2.76490400  | 0.11980300  | 0.06206500  |
| H | 3.46734600  | -0.50009100 | -0.31743700 |
| H | 2.96917100  | 1.10265200  | -0.07242500 |

HC=CH-B(OH)<sub>2</sub>  
COOCH<sub>3</sub> SCF energy=-482.5364827

|   |             |             |             |
|---|-------------|-------------|-------------|
| C | -0.04061500 | 0.65846400  | -0.00007300 |
| H | 0.25832200  | 1.70621700  | -0.00035800 |
| C | 0.85170200  | -0.34672300 | 0.00021500  |
| H | 0.46409200  | -1.36472900 | 0.00043000  |
| B | 2.41156700  | -0.15968100 | 0.00009700  |
| O | 3.17560000  | -1.29280000 | -0.00034500 |
| H | 4.12634100  | -1.09756300 | -0.00051400 |
| O | 3.05848800  | 1.05302800  | 0.00028200  |
| H | 2.47972900  | 1.82807900  | 0.00053400  |
| C | -1.51980700 | 0.51373600  | -0.00012900 |
| O | -2.27864700 | 1.46746800  | -0.00027400 |
| O | -1.93608200 | -0.76975000 | 0.00010000  |
| C | -3.36193000 | -0.96738900 | 0.00013400  |
| H | -3.50210500 | -2.04856000 | -0.00027000 |
| H | -3.80751800 | -0.51892700 | 0.89210600  |
| H | -3.80767400 | -0.51820600 | -0.89138900 |

F<sub>3</sub>C-CH=CH-B(OH)<sub>2</sub> SCF energy=-591.7296029

|   |             |             |             |
|---|-------------|-------------|-------------|
| C | -0.24985800 | 0.41709100  | -0.00017600 |
| H | -0.13088000 | 1.50023400  | -0.00065200 |
| C | 0.78069300  | -0.43611400 | 0.00023900  |
| H | 0.55573100  | -1.50208800 | 0.00059300  |
| B | 2.29774100  | -0.02081400 | 0.00004200  |
| O | 3.21137800  | -1.03471100 | -0.00014800 |
| H | 4.12663100  | -0.71172700 | -0.00032700 |
| O | 2.76437200  | 1.27099100  | 0.00003100  |
| H | 2.08829300  | 1.96213400  | 0.00032000  |
| C | -1.69254900 | 0.00598500  | -0.00003800 |
| F | -2.33968300 | 0.50205600  | 1.08930500  |
| F | -1.87216100 | -1.33173900 | 0.00050500  |
| F | -2.33973400 | 0.50118400  | -1.08974000 |

H<sub>2</sub>N-CH=CH-BF<sub>3</sub>Na SCF energy=-620.3082647

|    |             |             |             |
|----|-------------|-------------|-------------|
| C  | 1.73520200  | -0.20061100 | 0.26400900  |
| H  | 1.58102700  | 0.01399600  | 1.32275900  |
| C  | 0.67845600  | -0.48673400 | -0.52729700 |
| H  | 0.89031600  | -0.74596100 | -1.57070600 |
| B  | -0.85042400 | -0.54685300 | -0.01986800 |
| F  | -1.43031700 | -1.78880200 | 0.08586400  |
| F  | -0.94750200 | 0.18216000  | 1.25569500  |
| F  | -1.65577800 | 0.30107800  | -0.92776600 |
| Na | -0.45567300 | 1.89811100  | -0.05056200 |
| N  | 3.07922100  | -0.09438000 | -0.12010900 |
| H  | 3.75206500  | -0.33182500 | 0.59997700  |

|   |            |             |             |
|---|------------|-------------|-------------|
| H | 2.84863200 | 2.15468600  | -0.01537800 |
| C | 4.43932700 | 0.00003500  | -0.05270800 |
| N | 5.60323600 | -0.00004000 | -0.07968100 |

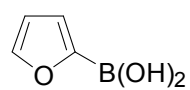

SCF energy=-406.1056026

|   |             |             |             |
|---|-------------|-------------|-------------|
| C | 2.13062000  | -0.71812600 | -0.00035300 |
| C | 2.29734100  | 0.63720800  | -0.00004800 |
| C | 0.98038900  | 1.19429200  | 0.00042700  |
| C | 0.08971100  | 0.15110600  | 0.00034400  |
| H | 2.81828600  | -1.55122500 | -0.00065100 |
| H | 3.23942100  | 1.16869800  | -0.00007100 |
| B | -1.45526400 | 0.02337800  | 0.00012600  |
| O | -2.21255000 | 1.16245400  | -0.00049700 |
| H | -3.16252900 | 0.96768300  | -0.00059500 |
| O | -2.08114900 | -1.19949600 | 0.00026100  |
| H | -1.46019400 | -1.94366100 | 0.00048100  |
| O | 0.81115700  | -1.03644900 | -0.00012400 |
| H | 0.71329700  | 2.24266900  | 0.00087000  |

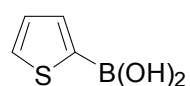

SCF energy=-729.0963492

|   |             |             |             |
|---|-------------|-------------|-------------|
| C | 2.36438100  | -0.20278700 | -0.00006300 |
| C | 2.05903000  | 1.13683800  | 0.00016500  |
| C | 0.65395200  | 1.36348200  | 0.00025500  |
| C | -0.10912600 | 0.20984900  | 0.00009300  |
| H | 3.34642100  | -0.65913400 | -0.00016200 |
| H | 2.80455800  | 1.92509700  | 0.00025300  |
| B | -1.65567000 | 0.05023000  | 0.00002900  |
| O | -2.18990900 | -1.21016700 | 0.00039800  |
| H | -3.15958000 | -1.19797800 | 0.00022000  |
| O | -2.52966600 | 1.11541100  | -0.00033300 |
| H | -2.10911300 | 1.98595100  | -0.00088500 |
| H | 0.22353600  | 2.36228400  | 0.00042900  |
| S | 0.94498100  | -1.18460100 | -0.00020200 |

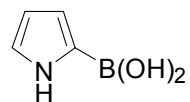

SCF energy=-386.258404

|   |             |             |             |
|---|-------------|-------------|-------------|
| C | -2.19157200 | -0.72002700 | -0.00001100 |
| C | -2.30025700 | 0.66288800  | 0.00001500  |
| C | -0.98038400 | 1.17975800  | -0.00015900 |
| C | -0.08325100 | 0.11021900  | -0.00000600 |
| N | -0.86431000 | -1.03501700 | 0.00010700  |
| H | -0.47733000 | -1.96873400 | 0.00026300  |
| H | -2.95323500 | -1.48773200 | 0.00001700  |
| H | -3.22358100 | 1.22696400  | 0.00007300  |
| B | 1.45615200  | 0.02100800  | 0.00001500  |
| O | 2.30447800  | 1.10591700  | -0.00002000 |
| H | 1.85462800  | 1.96200000  | 0.00105200  |
| O | 2.02334500  | -1.23350700 | -0.00009200 |
| H | 2.99223300  | -1.19902600 | -0.00007400 |
| H | -0.71311300 | 2.23029500  | -0.00028800 |

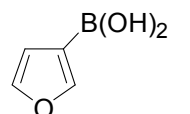

SCF energy=-406.1036528

|   |             |             |             |
|---|-------------|-------------|-------------|
| C | -2.22602700 | 0.67181800  | -0.00025500 |
| C | -0.95185800 | 1.14187600  | -0.00039500 |
| C | -0.07296800 | -0.00860700 | 0.00002400  |
| C | -0.92144000 | -1.08572500 | 0.00034600  |
| H | -3.20130300 | 1.13445500  | -0.00051100 |

|   |            |             |             |
|---|------------|-------------|-------------|
| H | 3.30698900 | -0.54636000 | -1.00016000 |
|---|------------|-------------|-------------|

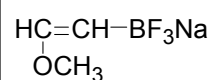

SCF energy=-679.4805313

|    |             |             |             |
|----|-------------|-------------|-------------|
| C  | 1.27417600  | 0.08509200  | 0.64520200  |
| H  | 0.93715100  | 0.43584600  | 1.61908200  |
| C  | 0.42581000  | -0.44026500 | -0.25973200 |
| H  | 0.82939900  | -0.82274700 | -1.19809700 |
| B  | -1.15863000 | -0.60541600 | -0.00371200 |
| F  | -1.63283400 | -1.88544400 | 0.14250500  |
| F  | -1.54401400 | 0.22909800  | 1.14419500  |
| F  | -1.85770800 | 0.06040100  | -1.12524900 |
| Na | -1.08673600 | 1.88182600  | -0.22522500 |
| O  | 2.62952500  | 0.24052100  | 0.56707300  |
| C  | 3.27940900  | -0.26076700 | -0.59510600 |
| H  | 2.93225800  | 0.25969800  | -1.49825600 |
| H  | 4.34473400  | -0.07338100 | -0.44927500 |
| H  | 3.10214300  | -1.33745600 | -0.70924100 |

F<sub>3</sub>C-CH=CH-BF<sub>3</sub>Na SCF energy=-902.0365143

|    |             |             |             |
|----|-------------|-------------|-------------|
| C  | -1.05783000 | 0.37507400  | -0.00085700 |
| H  | -0.84670800 | 1.44227000  | -0.00287100 |
| C  | -0.08481100 | -0.54085800 | 0.00071200  |
| H  | -0.37161200 | -1.59326000 | 0.00259800  |
| B  | 1.45767500  | -0.17949600 | -0.00059000 |
| F  | 2.19511100  | -0.69510100 | -1.13706600 |
| F  | 1.76161300  | 1.23396100  | -0.00184300 |
| F  | 2.19620300  | -0.69289800 | 1.13650700  |
| Na | 3.84496500  | 0.34414900  | 0.00120900  |
| C  | -2.51912800 | 0.05971500  | 0.00012200  |
| F  | -3.14591400 | 0.59273300  | -1.08872900 |
| F  | -3.14478200 | 0.59395600  | 1.08900400  |
| F  | -2.79490500 | -1.26606700 | 0.00102300  |

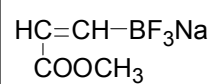

SCF energy=-792.837831

|    |             |             |             |
|----|-------------|-------------|-------------|
| C  | -0.56128100 | 0.24685700  | -0.54001600 |
| H  | -0.19043600 | 1.02102800  | -1.21298300 |
| C  | 0.26783900  | -0.67258300 | -0.00694100 |
| H  | -0.18393300 | -1.44279800 | 0.62079900  |
| B  | 1.87710400  | -0.63924400 | -0.14063500 |
| F  | 2.48044900  | -1.79500500 | -0.55795900 |
| F  | 2.27127200  | 0.49708300  | -0.97467000 |
| F  | 2.38214600  | -0.23992200 | 1.19082800  |
| Na | 1.77329200  | 1.78836500  | 0.70632200  |
| C  | -2.02806400 | 0.33415600  | -0.34020500 |
| O  | -2.55080800 | -0.71782500 | 0.32875200  |
| O  | -2.70112700 | 1.27590200  | -0.72979100 |
| C  | -3.97116900 | -0.67994400 | 0.55034400  |
| H  | -4.24264400 | 0.19524500  | 1.14737700  |
| H  | -4.50454000 | -0.64399900 | -0.40338200 |
| H  | -4.20344800 | -1.60020300 | 1.08724600  |

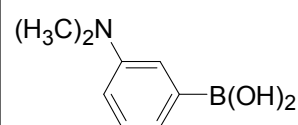

SCF energy=-542.2993941

|   |             |             |             |
|---|-------------|-------------|-------------|
| C | -0.02911800 | 2.31872800  | 0.01793600  |
| C | 1.20286100  | 1.66518400  | 0.02336300  |
| C | 1.25212200  | 0.25987000  | -0.00706500 |
| C | 0.04607300  | -0.45669400 | -0.04876600 |
| C | -1.21364400 | 0.18461800  | -0.07418700 |
| C | -1.22246100 | 1.59900600  | -0.02453600 |

|   |             |             |             |
|---|-------------|-------------|-------------|
| H | -0.64326900 | 2.17823300  | -0.00075700 |
| O | -2.22368100 | -0.69974400 | 0.00026000  |
| B | 1.48123100  | 0.01012600  | 0.00007500  |
| O | 2.11193900  | 1.22572500  | 0.00051900  |
| H | 3.07761300  | 1.13429700  | 0.00018700  |
| O | 2.28120800  | -1.11369600 | -0.00044000 |
| H | 1.80703800  | -1.95579900 | -0.00130700 |
| H | -0.76820700 | -2.15626800 | 0.00097700  |

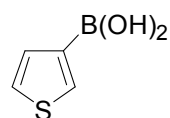

SCF energy=-729.093977

|   |             |             |             |
|---|-------------|-------------|-------------|
| C | -1.82179000 | 1.13919100  | -0.00001600 |
| C | -0.46339300 | 1.29118000  | 0.00000400  |
| C | 0.26000800  | 0.04546400  | 0.00002100  |
| C | -0.61257300 | -1.02322600 | 0.00000700  |
| H | -2.58554700 | 1.90631300  | -0.00003000 |
| H | 0.03028300  | 2.25685200  | 0.00002700  |
| B | 1.81824300  | -0.04850400 | 0.00000600  |
| O | 2.53561700  | 1.11864000  | 0.00000200  |
| H | 3.49220100  | 0.95805800  | -0.00001700 |
| O | 2.53385400  | -1.22644500 | -0.00001700 |
| H | 1.99702700  | -2.03017100 | 0.00000700  |
| H | -0.38260100 | -2.08273400 | 0.00002800  |
| S | -2.27324100 | -0.53868900 | -0.00000100 |

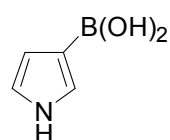

SCF energy=-386.2556559

|   |             |             |             |
|---|-------------|-------------|-------------|
| C | -2.24662700 | 0.69326400  | -0.00008500 |
| C | -0.95140500 | 1.15860800  | -0.00023300 |
| C | -0.06129600 | 0.02761000  | -0.00014600 |
| C | -0.88164400 | -1.09406100 | 0.00061500  |
| N | -2.18734200 | -0.68602100 | -0.00008900 |
| H | -2.98833900 | -1.30082900 | -0.00009200 |
| H | -3.19431800 | 1.21296300  | -0.00020700 |
| H | -0.67522900 | 2.20674900  | -0.00035900 |
| B | 1.48526100  | -0.00408500 | -0.00006500 |
| O | 2.13473100  | -1.21578600 | -0.00039400 |
| H | 3.09800800  | -1.10448800 | -0.00049400 |
| O | 2.28095900  | 1.12607900  | 0.00036900  |
| H | 1.78543300  | 1.95625200  | 0.00044300  |
| H | -0.62015000 | -2.14295100 | 0.00095300  |

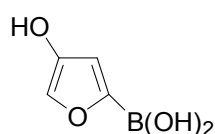

SCF energy=-481.3286515

|   |             |             |             |
|---|-------------|-------------|-------------|
| C | -1.53775600 | 1.16789400  | 0.00058100  |
| C | -1.91482100 | -0.14746900 | -0.00018500 |
| C | -0.71410000 | -0.91965800 | 0.00010700  |
| C | 0.33366000  | -0.03157800 | 0.00010100  |
| H | -2.08930300 | 2.09477000  | 0.00113400  |
| H | -0.62394000 | -1.99884000 | -0.00027100 |
| B | 1.87789000  | -0.16701700 | -0.00001500 |
| O | 2.43065400  | -1.41847600 | 0.00014300  |
| H | 3.39993100  | -1.38847200 | 0.00010700  |
| O | 2.69920500  | 0.93300400  | -0.00049300 |
| H | 2.21226800  | 1.77127900  | 0.00046400  |
| O | -3.21132200 | -0.57997800 | -0.00133000 |
| H | -3.23047100 | -1.54844900 | 0.00666900  |

|   |             |             |             |
|---|-------------|-------------|-------------|
| H | -0.07065800 | 3.40504800  | 0.05243600  |
| H | 2.11299600  | 2.26233300  | 0.06087900  |
| B | 2.60728800  | -0.52919300 | 0.00715900  |
| O | 2.58116700  | -1.90109300 | 0.00597700  |
| H | 3.47502300  | -2.27685300 | 0.01217100  |
| O | 3.85107000  | 0.06541400  | 0.01901200  |
| H | 3.83081300  | 1.03217600  | 0.01356700  |
| H | -2.15854800 | 2.14525400  | -0.02016200 |
| H | 0.10629600  | -1.53786400 | -0.06380900 |
| N | -2.39736700 | -0.54521100 | -0.15702000 |
| C | -2.35744500 | -1.98435800 | 0.05748900  |
| H | -1.99135800 | -2.25612000 | 1.06172800  |
| H | -3.36463500 | -2.38893700 | -0.06387600 |
| H | -1.71467300 | -2.47313100 | -0.68301900 |
| C | -3.66279900 | 0.13268400  | 0.07472600  |
| H | -3.81656900 | 0.93605800  | -0.65520000 |
| H | -4.47821100 | -0.58283600 | -0.05096500 |
| H | -3.73676700 | 0.56851100  | 1.08591900  |

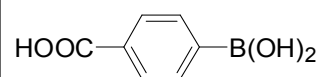

SCF energy=-596.

|   |             |             |             |
|---|-------------|-------------|-------------|
| C | -0.75450100 | -1.18073500 | -0.00001600 |
| C | 0.63938500  | -1.18039000 | -0.00001000 |
| C | 1.37364600  | 0.02111400  | 0.00003200  |
| C | 0.64954100  | 1.22841300  | 0.00003700  |
| C | -0.74276300 | 1.24460300  | 0.00004600  |
| C | -1.45341000 | 0.03595600  | 0.00001300  |
| H | 1.16962200  | 2.18560900  | 0.00008300  |
| H | -1.29412900 | 2.17958200  | 0.00004600  |
| B | 2.94621500  | -0.02470500 | 0.00000600  |
| O | 3.75793000  | 1.08556200  | -0.00006800 |
| H | 3.29711800  | 1.93552500  | -0.00011300 |
| O | 3.55781000  | -1.24881400 | 0.00004200  |
| H | 4.52491500  | -1.17539200 | -0.00003300 |
| H | 1.17551400  | -2.12489000 | -0.00003800 |
| H | -1.30291100 | -2.11663800 | -0.00005700 |
| C | -2.93979900 | 0.09679900  | -0.00000200 |
| O | -3.59624200 | 1.12125500  | -0.00002600 |
| O | -3.52515400 | -1.12993300 | -0.00002300 |
| H | -4.48855900 | -0.97940100 | 0.00007700  |

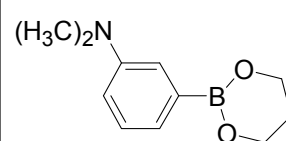

SCF energy=-659.0241595

|   |             |             |             |
|---|-------------|-------------|-------------|
| C | -2.49995300 | 1.49590200  | -0.00743500 |
| C | -2.23115300 | 0.10972800  | 0.07384800  |
| C | -0.87511700 | -0.28706000 | 0.08716000  |
| C | 0.17619800  | 0.64266100  | 0.05324700  |
| C | -0.12653500 | 2.01459600  | -0.00863100 |
| C | -1.45883800 | 2.42469200  | -0.04236600 |
| H | 0.67631100  | 2.74545200  | -0.03689600 |
| H | -1.70247300 | 3.48345800  | -0.10119400 |
| B | 1.66069400  | 0.14844100  | 0.08647200  |
| O | 1.91463300  | -1.20340700 | 0.13673200  |
| O | 2.67157400  | 1.08024800  | 0.06226900  |
| C | 3.25896400  | -1.69277800 | 0.17488600  |
| H | 3.25825200  | -2.66845600 | -0.32201100 |
| H | 3.54015400  | -1.84924900 | 1.22590300  |
| C | 4.04288200  | 0.67354700  | 0.09484200  |
| H | 4.38512400  | 0.69572300  | 1.13910800  |
| H | 4.61249300  | 1.42483400  | -0.46182200 |
| C | 4.22181700  | -0.72032000 | -0.50166000 |
| H | 4.01710500  | -0.68908000 | -1.57996000 |

O -0.17601800 1.25165800 0.00022300

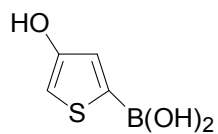

SCF energy=-804.3235217

C -1.87719400 0.94797900 -0.00010800  
C -1.89188800 -0.42584300 0.00005400  
C -0.58534900 -0.99654700 0.00011100  
C 0.42836300 -0.06088100 0.00001600  
S -0.25577900 1.54735500 -0.00016500  
H -2.72754200 1.61570500 -0.00006200  
H -0.38862600 -2.06509600 0.00021000  
B 1.95898100 -0.33847500 0.00002600  
O 2.36869000 -1.64578500 -0.00034900  
H 3.33552900 -1.72244600 -0.00028200  
O 2.93379500 0.63413700 0.00035900  
H 2.61748900 1.54826400 0.00074900  
O -3.06587200 -1.13181800 0.00011500  
H -2.87578500 -2.08224500 0.00045300

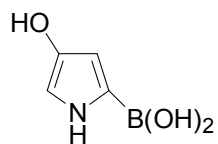

SCF energy=-461.4815069

C 1.58879300 1.19305900 0.00010200  
C 1.92270100 -0.15286800 0.00006300  
C 0.72058800 -0.89815100 -0.00006800  
C -0.34715600 0.00858800 -0.00011500  
N 0.22111600 1.26498800 -0.00008200  
H -0.32158100 2.11712200 0.00063200  
H 2.21977200 2.06946100 0.00016000  
H 0.64116400 -1.97992500 -0.00021600  
O 3.21875400 -0.60711000 0.00007300  
H 3.21822400 -1.57555100 -0.00086100  
B -1.87842800 -0.16916300 0.00000200  
O -2.52834900 -1.38373900 0.00016100  
H -1.93915400 -2.15044800 0.00024000  
O -2.65086700 0.97008000 -0.00013700  
H -3.59994800 0.77263000 -0.00005600

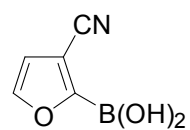

SCF energy=-498.3615079

C -1.57370800 -1.87576000 0.00014900  
C -2.15677900 -0.64493700 -0.00007100  
C -1.06374400 0.28507900 -0.00005500  
C 0.11399700 -0.44523100 0.00003600  
O -0.21967100 -1.76935100 0.00024300  
B 1.62330300 -0.02864800 0.00017500  
O 2.55751000 -1.01982700 -0.00050300  
H 3.46139800 -0.66677800 -0.00096500  
O 2.02745800 1.27784400 0.00051000  
H 1.33492000 1.95696800 0.00052600  
H -3.21240900 -0.41439000 -0.00033200  
H -1.96761600 -2.88105000 0.00004800  
C -1.12396600 1.70511500 -0.00018100  
N -1.11857000 2.87051100 -0.00020300

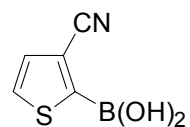

SCF energy=-821.358191

H 5.25748900 -1.05901400 -0.36962500  
H -3.52080300 1.85892600 -0.04068400  
N -3.26601300 -0.82759300 0.15597800  
C -4.62147800 -0.40109500 -0.15244400  
H -4.73029200 -0.02273800 -1.18408600  
H -5.29871000 -1.24866800 -0.02398300  
H -4.95004300 0.38630200 0.53532200  
C -2.95574800 -2.23284000 -0.05711500  
H -3.86867100 -2.82035900 0.06618300  
H -2.54425500 -2.43487200 -1.06129800  
H -2.23314300 -2.59016000 0.68442700  
H -0.61580400 -1.33808000 0.12839800

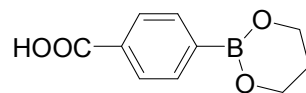

SCF energy=-713.6414182

C -0.26928700 0.01368400 -0.05150700  
C 0.46468700 -1.18706800 -0.03707300  
C 1.85843100 -1.18400800 -0.00753700  
C 2.55317100 0.03561100 0.00743700  
C 1.83822400 1.24300400 -0.00711100  
C 0.44600900 1.22659700 -0.03647800  
H 2.38842600 2.17881500 0.00445400  
H -0.10147500 2.16508000 -0.04810800  
B -1.83817500 0.00068000 -0.08693100  
O -2.48607100 -1.20844600 -0.10204100  
O -2.50591500 1.19874000 -0.09880600  
C -3.91837800 -1.26489000 -0.13435200  
H -4.21248400 -2.17691800 0.39427800  
H -4.23354400 -1.36356400 -1.18207100  
C -3.93891400 1.23213400 -0.13085700  
H -4.25575600 1.32871100 -1.17826200  
H -4.24765000 2.13774900 0.40040300  
C -4.53445100 -0.02223500 0.50366100  
H -4.33067500 -0.02205600 1.58250500  
H -5.62393100 -0.03103200 0.37232100  
H -0.06825700 -2.13390800 -0.04923000  
C 4.03740400 0.09797000 0.03789600  
O 4.69690500 1.12109900 0.05219400  
O 4.62703900 -1.12901500 0.04890300  
H 5.58904000 -0.97206400 0.06838200  
H 2.41013100 -2.11803900 0.00350700

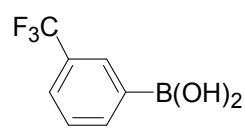

SCF energy=-745.4108457

C 0.28134500 2.37386900 0.00071100  
C 1.47679900 1.65229800 0.00786300  
C 1.48910700 0.24675500 -0.00361600  
C 0.24943400 -0.41773100 -0.02246400  
C -0.94963000 0.29826600 -0.03204500  
C -0.93846900 1.69791800 -0.01837000  
H 0.29760300 3.46023100 0.00720600  
H 2.41156200 2.21176400 0.02137100  
B 2.81779200 -0.59434200 0.00061200  
O 2.71567200 -1.95804900 -0.00417400  
H 3.58189100 -2.39409000 -0.00206400  
O 4.08252300 -0.05391300 0.00867000  
H 4.12243200 0.91191400 0.01029200  
H -1.87242700 2.25101800 -0.02917300  
H 0.23210200 -1.50268100 -0.03539400  
C -2.26572700 -0.43458300 -0.00323300  
F -2.69791300 -0.64802800 1.27115600  
F -2.19540100 -1.65085000 -0.59483100  
F -3.25166500 0.25759900 -0.63014000

|   |             |             |             |
|---|-------------|-------------|-------------|
| C | -2.50249200 | 0.07992300  | 0.00002400  |
| C | -1.81116800 | 1.26173800  | -0.00066900 |
| C | -0.39751900 | 1.04230000  | 0.00001700  |
| C | -0.02166100 | -0.29958600 | -0.00002500 |
| S | -1.44659800 | -1.28785700 | 0.00031600  |
| B | 1.40761500  | -0.94608300 | -0.00008300 |
| O | 2.57724900  | -0.24112100 | -0.00006200 |
| H | 2.51075200  | 0.72716400  | -0.00014900 |
| O | 1.46199000  | -2.31280000 | -0.00029200 |
| H | 2.37351600  | -2.64473200 | 0.00006700  |
| H | -2.26919300 | 2.24404900  | -0.00123400 |
| C | 0.56702900  | 2.09476600  | 0.00023500  |
| N | 1.39282400  | 2.91753500  | 0.00027400  |
| H | -3.57640100 | -0.05656500 | 0.00009700  |

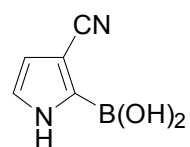

SCF energy=-478.5236267

|   |             |             |             |
|---|-------------|-------------|-------------|
| C | -1.65965400 | -1.85152600 | 0.00004100  |
| C | -2.18266500 | -0.57402700 | -0.00031400 |
| C | -1.06924400 | 0.31684000  | -0.00003600 |
| C | 0.11299600  | -0.43977800 | -0.00035900 |
| N | -0.29355500 | -1.75104900 | 0.00037200  |
| H | 0.35589100  | -2.52681800 | 0.00055400  |
| B | 1.61415200  | -0.03588400 | -0.00012600 |
| O | 2.07397700  | 1.24979600  | -0.00009900 |
| H | 1.39818600  | 1.94685900  | 0.00023100  |
| O | 2.51844300  | -1.06969300 | -0.00002200 |
| H | 3.43701200  | -0.75798400 | 0.00027800  |
| H | -3.22861100 | -0.30187000 | -0.00047700 |
| H | -2.15399700 | -2.81259100 | 0.00025200  |
| C | -1.08768100 | 1.73707700  | 0.00010800  |
| N | -1.03517600 | 2.90240300  | 0.00021800  |

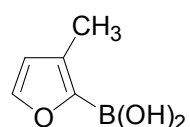

SCF energy=-445.4237039

|   |             |             |             |
|---|-------------|-------------|-------------|
| C | -1.82084200 | -1.41695000 | 0.00004500  |
| C | -2.23719500 | -0.11885000 | -0.00012000 |
| C | -1.05189900 | 0.69204900  | 0.00003900  |
| C | 0.01746300  | -0.17513100 | 0.00000900  |
| O | -0.46765100 | -1.48306700 | -0.00000700 |
| H | -2.34231700 | -2.36334600 | 0.00011100  |
| H | -3.26306700 | 0.22688500  | -0.00024400 |
| C | -1.00389700 | 2.19234200  | 0.00007700  |
| H | -1.51186000 | 2.60041500  | -0.88321100 |
| H | -1.51278600 | 2.60038300  | 0.88281900  |
| H | 0.02698200  | 2.55354900  | 0.00056800  |
| B | 1.56071000  | -0.04679800 | 0.00001500  |
| O | 2.14475000  | 1.19357600  | -0.00006000 |
| H | 3.11272200  | 1.13256300  | -0.00013500 |
| O | 2.37198700  | -1.15673200 | 0.00002700  |
| H | 1.87231500  | -1.98743300 | 0.00002900  |

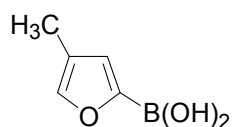

SCF energy=-445.4222621

|   |             |             |             |
|---|-------------|-------------|-------------|
| C | 1.48521000  | 1.17629400  | -0.00002500 |
| C | 1.90091700  | -0.12652200 | -0.00000100 |
| C | 0.69290500  | -0.90079300 | -0.00016000 |
| C | -0.36917600 | -0.03431600 | 0.00000200  |
| O | 0.12802400  | 1.26132100  | -0.00009700 |

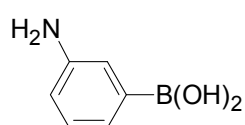

SCF energy=-463.6851068

|   |             |             |             |
|---|-------------|-------------|-------------|
| C | 1.21597700  | 1.86320000  | 0.01865600  |
| C | -0.13864900 | 1.52467600  | 0.01865500  |
| C | -0.53592100 | 0.17441300  | 0.00264200  |
| C | 0.46109200  | -0.81362900 | -0.01169100 |
| C | 1.82678700  | -0.48701700 | -0.01318200 |
| C | 2.19457300  | 0.86994600  | 0.00168900  |
| H | 1.51710100  | 2.90800800  | 0.03281000  |
| H | -0.87551600 | 2.32648000  | 0.03614100  |
| B | -2.04415900 | -0.25662900 | 0.00172400  |
| O | -3.10408500 | 0.62322300  | -0.03213000 |
| H | -2.85020500 | 1.55560000  | -0.06752500 |
| O | -2.35094800 | -1.59295500 | 0.03543400  |
| H | -3.30889200 | -1.74324500 | 0.02490200  |
| H | 3.24814300  | 1.14304200  | -0.00622400 |
| H | 0.16390400  | -1.85992100 | -0.02701100 |
| N | 2.80087400  | -1.48983200 | -0.09018100 |
| H | 3.71235500  | -1.24393100 | 0.27700600  |
| H | 2.50490100  | -2.40575100 | 0.22550100  |

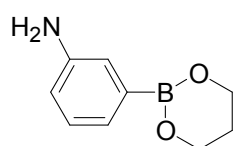

SCF energy=-580.410381

|   |             |             |             |
|---|-------------|-------------|-------------|
| C | -3.33078300 | 0.69646900  | 0.05262800  |
| C | -2.81706500 | -0.61081400 | 0.01310300  |
| C | -1.42509800 | -0.78593900 | -0.03182700 |
| C | -0.54495200 | 0.30786500  | -0.03690900 |
| C | -1.08313700 | 1.60792900  | 0.00351600  |
| C | -2.46626800 | 1.79233200  | 0.04857300  |
| H | -4.40819200 | 0.85087100  | 0.07956800  |
| H | -0.41644400 | 2.46526900  | 0.00081100  |
| H | -2.88159900 | 2.79718600  | 0.08081500  |
| B | 1.00291900  | 0.08052700  | -0.08589700 |
| O | 1.83397300  | 1.17532500  | -0.09848600 |
| O | 1.48781700  | -1.20653100 | -0.10897500 |
| C | 3.25514000  | 1.01311500  | -0.14448800 |
| H | 3.69135500  | 1.86711300  | 0.38370900  |
| H | 3.57502800  | 1.06617000  | -1.19462700 |
| C | 2.89676500  | -1.45557700 | -0.15339100 |
| H | 3.19055600  | -1.59098500 | -1.20374200 |
| H | 3.07059200  | -2.40179100 | 0.36930000  |
| C | 3.68136800  | -0.31141900 | 0.48365900  |
| H | 4.75887900  | -0.46760600 | 0.34486500  |
| H | 3.48548600  | -0.28678800 | 1.56378000  |
| H | -1.01727300 | -1.79438900 | -0.06813300 |
| N | -3.68065200 | -1.71739300 | -0.04486900 |
| H | -3.27371700 | -2.59017000 | 0.27088200  |
| H | -4.59484500 | -1.56987700 | 0.36684500  |

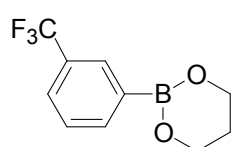

SCF energy=-862.1387866

|   |             |             |             |
|---|-------------|-------------|-------------|
| C | 2.21106400  | 1.65064400  | -0.06980400 |
| C | 1.96140600  | 0.27352100  | -0.04393100 |
| C | 0.64903300  | -0.20451600 | 0.00627300  |
| C | -0.44061900 | 0.68197800  | 0.02755800  |
| C | -0.17208600 | 2.06229900  | -0.00054100 |
| C | 1.13805400  | 2.54316700  | -0.04954800 |



|   |             |             |             |
|---|-------------|-------------|-------------|
| H | 2.01836700  | 2.11656600  | 0.00006400  |
| B | -1.91180600 | -0.18339400 | -0.00000700 |
| O | -2.45825900 | -1.43785400 | 0.00003500  |
| H | -3.42755600 | -1.41075200 | -0.00017400 |
| O | -2.74378500 | 0.91027300  | 0.00013100  |
| H | -2.26166800 | 1.75126200  | -0.00017000 |
| C | 3.31378800  | -0.63410000 | 0.00010900  |
| H | 3.51587500  | -1.25234000 | 0.88364400  |
| H | 3.51596300  | -1.25225200 | -0.88346000 |
| H | 4.03297700  | 0.19205400  | 0.00019000  |
| H | 0.61537400  | -1.98086100 | -0.00016400 |

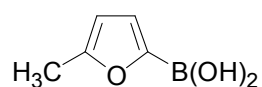

SCF energy=-445.426003

|   |             |             |             |
|---|-------------|-------------|-------------|
| C | -1.81309700 | -0.04793100 | 0.00003100  |
| C | -1.63623200 | 1.31013500  | 0.00010800  |
| C | -0.22574200 | 1.53835500  | 0.00001500  |
| C | 0.39048200  | 0.31393000  | -0.00013800 |
| O | -0.59860900 | -0.66633000 | -0.00011100 |
| B | 1.85699100  | -0.18025100 | -0.00002000 |
| O | 2.86974300  | 0.74079100  | -0.00004000 |
| H | 3.74285300  | 0.31908500  | 0.00008700  |
| O | 2.17137600  | -1.51905300 | 0.00011500  |
| H | 1.38785900  | -2.08958400 | 0.00012100  |
| H | 0.28356500  | 2.49301700  | -0.00001800 |
| H | -2.42306000 | 2.05289600  | 0.00023000  |
| C | -3.01732200 | -0.92440100 | -0.00000900 |
| H | -3.92424000 | -0.31292700 | 0.00044100  |
| H | -3.04049300 | -1.57217100 | -0.88559300 |
| H | -3.04005900 | -1.57285500 | 0.88507900  |

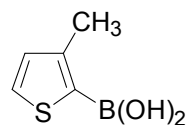

SCF energy=-768.4127401

|   |             |             |             |
|---|-------------|-------------|-------------|
| C | 2.33167600  | -0.63942700 | -0.00002500 |
| C | 2.10047800  | 0.70973500  | 0.00005000  |
| C | 0.70981800  | 1.05473100  | 0.00005200  |
| C | -0.11912600 | -0.05861900 | -0.00003500 |
| S | 0.85210000  | -1.52618800 | -0.00011000 |
| H | 3.28254300  | -1.15688300 | -0.00004700 |
| H | 2.89615100  | 1.44905800  | 0.00011100  |
| B | -1.67157300 | -0.17978200 | -0.00002300 |
| O | -2.34579700 | -1.38414700 | 0.00028100  |
| H | -1.79626700 | -2.18006500 | 0.00063900  |
| O | -2.45210100 | 0.94907700  | -0.00030500 |
| H | -3.39564600 | 0.72222600  | -0.00021700 |
| C | 0.25503200  | 2.49244500  | 0.00014100  |
| H | -0.83187700 | 2.57441900  | 0.00015700  |
| H | 0.64264500  | 3.01821800  | 0.88273900  |
| H | 0.64261700  | 3.01830800  | -0.88241500 |

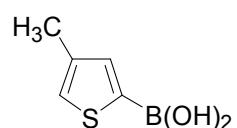

SCF energy=-768.4128054

|   |             |             |             |
|---|-------------|-------------|-------------|
| C | 1.79601800  | 1.01300100  | -0.00000300 |
| C | 1.90069500  | -0.35882700 | 0.00008800  |
| C | 0.60605500  | -0.96421400 | 0.00016600  |
| C | -0.45444500 | -0.07894000 | 0.00006800  |
| S | 0.15687600  | 1.55808100  | -0.00006400 |
| H | 2.60793700  | 1.73051900  | 0.00001800  |
| B | -1.98104800 | -0.37153000 | 0.00000100  |
| O | -2.51113800 | -1.64396200 | -0.00011500 |
| H | -1.85661900 | -2.35560600 | -0.00028900 |

|   |             |             |             |
|---|-------------|-------------|-------------|
| H | -1.00312100 | 2.76248400  | 0.01452600  |
| H | 1.32727800  | 3.61313600  | -0.07395800 |
| B | -1.91119500 | 0.13936800  | 0.08206100  |
| O | -2.94494500 | 1.04069900  | 0.10690700  |
| O | -2.10931400 | -1.21726800 | 0.09985900  |
| C | -4.30322300 | 0.58312800  | 0.15903600  |
| H | -4.91024500 | 1.33077500  | -0.36070500 |
| H | -4.61729700 | 0.56251300  | 1.21146700  |
| C | -3.43627300 | -1.75896900 | 0.14517500  |
| H | -3.68655200 | -1.96346300 | 1.19500500  |
| H | -3.40771600 | -2.71413700 | -0.38800500 |
| C | -4.44545300 | -0.79728000 | -0.47735400 |
| H | -4.26798000 | -0.72495600 | -1.55840000 |
| H | -5.46551800 | -1.17551600 | -0.33375800 |
| H | 3.23141100  | 2.01928100  | -0.11081500 |
| C | 3.11177200  | -0.69607900 | -0.01225000 |
| H | 0.46430800  | -1.27402100 | 0.02390000  |
| F | 3.49040100  | -0.99633200 | 1.26322200  |
| F | 4.21806100  | -0.20924300 | -0.63193000 |
| F | 2.81191900  | -1.87750800 | -0.60811100 |

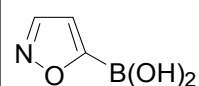

SCF energy=-422.1109368

|   |             |             |             |
|---|-------------|-------------|-------------|
| C | -2.27467800 | 0.54303300  | 0.00028000  |
| C | -1.00369900 | 1.18164700  | -0.00011000 |
| C | -0.10664500 | 0.14877000  | 0.00000500  |
| O | -0.80341400 | -1.02502200 | -0.00005000 |
| H | -3.26164300 | 0.98890800  | 0.00040800  |
| H | -0.78470300 | 2.23941100  | -0.00018800 |
| N | -2.17225900 | -0.76709800 | -0.00019900 |
| B | 1.45311900  | 0.02796100  | -0.00001900 |
| O | 2.07646500  | -1.18902300 | 0.00010700  |
| H | 1.46576000  | -1.94236100 | 0.00009800  |
| O | 2.18794300  | 1.17632900  | -0.00003900 |
| H | 3.14297600  | 1.00496500  | -0.00002800 |

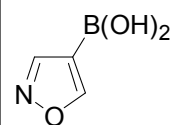

SCF energy=-422.1108391

|   |             |             |             |
|---|-------------|-------------|-------------|
| C | -0.97294500 | -1.09260200 | 0.00095000  |
| C | -0.07926400 | 0.03258600  | -0.00009900 |
| C | -0.96304300 | 1.07858100  | -0.00054800 |
| O | -2.23410300 | 0.65386500  | -0.00045200 |
| H | -0.71009000 | -2.14330200 | 0.00164300  |
| N | -2.23678500 | -0.75468500 | 0.00032900  |
| H | -0.84540100 | 2.15488500  | -0.00130200 |
| B | 1.47528700  | 0.00100500  | -0.00033000 |
| O | 2.08127000  | -1.22501200 | -0.00087900 |
| H | 3.04912900  | -1.15809700 | -0.00049200 |
| O | 2.28421400  | 1.11447300  | 0.00077900  |
| H | 1.82789300  | 1.96627800  | 0.00208400  |

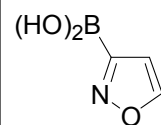

SCF energy=-422.1120029

|   |             |             |             |
|---|-------------|-------------|-------------|
| C | -0.10249100 | 0.07249200  | -0.00007700 |
| C | -1.01787900 | 1.17267000  | 0.00014500  |
| C | -2.24127200 | 0.57948100  | -0.00002000 |
| O | -2.11102100 | -0.76391500 | -0.00013900 |
| N | -0.75402200 | -1.07667900 | 0.00017100  |
| H | -3.25673200 | 0.94977000  | -0.00006900 |
| H | -0.78264000 | 2.22661100  | 0.00025900  |
| B | 1.46837900  | 0.02264800  | -0.00009400 |

|   |             |             |             |
|---|-------------|-------------|-------------|
| O | -2.85745900 | 0.68033900  | 0.00008400  |
| H | -3.78180800 | 0.38721200  | 0.00000800  |
| C | 3.19785600  | -1.12571000 | -0.00006300 |
| H | 4.05868500  | -0.44934100 | 0.00154300  |
| H | 3.28057600  | -1.77237500 | 0.88288800  |
| H | 3.28188500  | -1.76979500 | -0.88479000 |
| H | 0.47627400  | -2.04512600 | 0.00035100  |

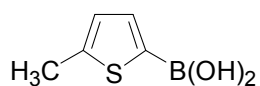

SCF energy=-768.4135705

|   |             |             |             |
|---|-------------|-------------|-------------|
| C | -1.95899300 | 0.09364800  | -0.00011300 |
| C | -1.49507600 | 1.38944000  | -0.00012400 |
| C | -0.07464500 | 1.47311200  | -0.00002900 |
| C | 0.56808900  | 0.25058300  | 0.00000700  |
| S | -0.62890900 | -1.02770600 | -0.00001300 |
| B | 2.08791200  | -0.06612300 | 0.00001700  |
| O | 3.06748100  | 0.90444300  | 0.00012700  |
| H | 2.73731200  | 1.81315000  | 0.00025100  |
| O | 2.49373400  | -1.37447800 | -0.00007600 |
| H | 3.45985000  | -1.45745600 | -0.00014900 |
| H | 0.45306100  | 2.42424400  | -0.00008300 |
| H | -2.15407100 | 2.25257200  | -0.00022600 |
| C | -3.38510600 | -0.37603300 | 0.00013800  |
| H | -3.61318400 | -0.98539900 | -0.88315200 |
| H | -3.61378400 | -0.98244100 | 0.88532700  |
| H | -4.06153100 | 0.48501800  | -0.00151900 |

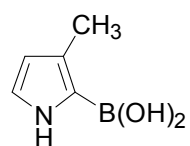

SCF energy=-425.574224

|   |             |             |             |
|---|-------------|-------------|-------------|
| C | -1.90933500 | -1.40305000 | 0.00011100  |
| C | -2.24643900 | -0.05742200 | 0.00029000  |
| C | -1.03854000 | 0.68878700  | -0.00008300 |
| C | 0.02482000  | -0.22460500 | -0.00010700 |
| N | -0.55101000 | -1.48801100 | -0.00024600 |
| H | -0.00937600 | -2.34125000 | 0.00087700  |
| H | -2.53209100 | -2.28721300 | -0.00004500 |
| H | -3.25173700 | 0.34526100  | 0.00019200  |
| C | -0.93987400 | 2.19204400  | -0.00018200 |
| H | -1.93726600 | 2.64444300  | -0.00055100 |
| H | -0.42073100 | 2.57667800  | 0.88929600  |
| H | -0.42014500 | 2.57636700  | -0.88943200 |
| B | 1.55763300  | -0.07238300 | -0.00005200 |
| O | 2.23402900  | 1.12868500  | 0.00026800  |
| H | 1.65979100  | 1.90652700  | 0.00038100  |
| O | 2.31254100  | -1.22580600 | -0.00013700 |
| H | 3.26411400  | -1.04038000 | 0.00003900  |

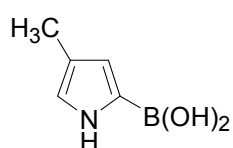

SCF energy=-425.5736636

|   |             |             |             |
|---|-------------|-------------|-------------|
| C | 1.53784000  | 1.21032800  | -0.00000700 |
| C | 1.90876300  | -0.12803100 | -0.00016700 |
| C | 0.69594500  | -0.86963300 | -0.00019300 |
| C | -0.38284000 | 0.01571500  | 0.00004400  |
| N | 0.17371800  | 1.28310600  | 0.00010400  |
| H | -0.37491000 | 2.13156900  | -0.00054000 |
| H | 2.15037100  | 2.10247400  | -0.00019300 |
| B | -1.91135800 | -0.18570600 | 0.00003900  |
| O | -2.53815700 | -1.41251600 | 0.00001200  |
| H | -1.93139900 | -2.16565800 | -0.00000100 |

|   |            |             |             |
|---|------------|-------------|-------------|
| O | 2.15608900 | 1.20111000  | -0.00005300 |
| H | 3.11725900 | 1.06753400  | -0.00002300 |
| O | 2.14055400 | -1.16667400 | 0.00004300  |
| H | 1.54324500 | -1.93242700 | 0.00002400  |

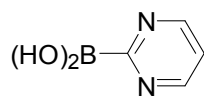

SCF energy=-440.4008416

|   |             |             |             |
|---|-------------|-------------|-------------|
| C | -0.11405900 | 0.00000000  | 0.00000700  |
| N | 0.51224800  | 1.19569200  | 0.00000400  |
| C | 1.84858300  | 1.18402200  | 0.00000100  |
| C | 2.58550200  | 0.00000000  | -0.00000300 |
| C | 1.84858300  | -1.18402200 | -0.00000400 |
| N | 0.51224800  | -1.19569200 | 0.00000100  |
| H | 2.34119200  | 2.15560800  | 0.00000000  |
| H | 3.67159100  | 0.00000000  | -0.00000600 |
| H | 2.34119200  | -2.15560800 | -0.00000500 |
| B | -1.70389200 | 0.00000000  | 0.00000100  |
| O | -2.33793200 | -1.21330600 | 0.00000200  |
| H | -3.30536800 | -1.18578600 | -0.00000100 |
| O | -2.33793200 | 1.21330600  | -0.00000300 |
| H | -3.30536800 | 1.18578500  | -0.00002600 |

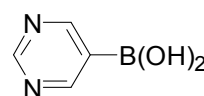

SCF energy=-440.4067698

|   |             |             |             |
|---|-------------|-------------|-------------|
| C | 2.54518400  | -0.01792100 | 0.00003600  |
| N | 1.93143300  | -1.20736300 | 0.00068400  |
| C | 0.59362700  | -1.17430500 | 0.00067200  |
| C | -0.15226600 | 0.01777100  | 0.00005600  |
| C | 0.62549800  | 1.18370400  | -0.00073200 |
| N | 1.96343700  | 1.18736900  | -0.00072600 |
| H | 0.08773600  | -2.13720000 | 0.00123900  |
| H | 3.63286300  | -0.03151700 | -0.00002000 |
| H | 0.16542600  | 2.17363600  | -0.00137500 |
| B | -1.72217900 | 0.00008400  | 0.00029400  |
| O | -2.34351700 | -1.21708600 | -0.00128900 |
| H | -3.31063300 | -1.14096000 | -0.00115100 |
| O | -2.51327700 | 1.12335100  | 0.00098500  |
| H | -2.04649000 | 1.96996700  | 0.00236800  |

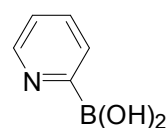

SCF energy=-424.3645256

|   |             |             |             |
|---|-------------|-------------|-------------|
| C | -0.15829500 | 0.06597100  | -0.00012500 |
| C | 0.59133900  | 1.25040000  | -0.00024500 |
| C | 1.98553000  | 1.17877700  | -0.00012300 |
| C | 2.59106100  | -0.07806300 | 0.00010700  |
| C | 1.77262800  | -1.21273400 | 0.00020900  |
| N | 0.43754500  | -1.15270200 | 0.00011800  |
| H | 2.58791900  | 2.08391400  | -0.00021800 |
| H | 0.07776400  | 2.20748600  | -0.00045700 |
| H | 3.67233300  | -0.18480200 | 0.00020900  |
| H | 2.20950100  | -2.20991500 | 0.00039600  |
| B | -1.73557200 | 0.01212400  | -0.00032500 |
| O | -2.45832900 | 1.17357200  | 0.00043600  |
| H | -3.41453000 | 1.01132900  | 0.00062600  |
| O | -2.35842500 | -1.20162900 | -0.00021500 |
| H | -1.67747700 | -1.90136100 | -0.00046200 |

|   |             |             |             |
|---|-------------|-------------|-------------|
| O | -2.70703500 | 0.93798600  | 0.00002600  |
| H | -3.65150900 | 0.71908500  | 0.00017400  |
| C | 3.31108500  | -0.66994900 | 0.00013900  |
| H | 3.50517300  | -1.29416700 | -0.88178900 |
| H | 4.04861700  | 0.14058900  | -0.00286800 |
| H | 3.50687900  | -1.28909600 | 0.88528800  |
| H | 0.62432700  | -1.95234900 | -0.00019900 |

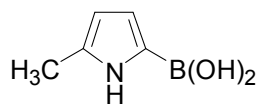

SCF energy=-425.5761166

|   |             |             |             |
|---|-------------|-------------|-------------|
| C | -1.85233800 | -0.07472900 | -0.00011600 |
| C | -1.63040900 | 1.29781700  | -0.00026400 |
| C | -0.22814000 | 1.50411700  | 0.00016700  |
| C | 0.40168600  | 0.26011000  | 0.00054700  |
| N | -0.62430200 | -0.67636600 | 0.00044100  |
| H | -0.45911500 | -1.67405900 | 0.00050800  |
| B | 1.87804200  | -0.17711800 | 0.00013600  |
| O | 2.95232100  | 0.68642900  | -0.00031900 |
| H | 2.70738400  | 1.62202100  | 0.00027100  |
| O | 2.14799500  | -1.52823000 | -0.00024900 |
| H | 3.10014100  | -1.71077100 | 0.00000100  |
| H | 0.27016400  | 2.46687300  | 0.00029300  |
| H | -2.40235000 | 2.05693900  | -0.00062500 |
| C | -3.12806300 | -0.85818500 | -0.00018300 |
| H | -3.21484100 | -1.50205400 | -0.88590900 |
| H | -3.21545300 | -1.50108800 | 0.88618400  |
| H | -3.98496600 | -0.17807500 | -0.00085700 |

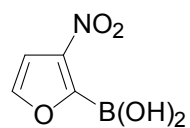

SCF energy=-610.6064583

|   |             |             |             |
|---|-------------|-------------|-------------|
| C | 0.39492600  | 2.45481600  | -0.00001900 |
| C | 1.44552600  | 1.59389800  | -0.00010100 |
| C | 0.84538000  | 0.29807100  | 0.00005600  |
| C | -0.53615800 | 0.43349800  | 0.00009300  |
| O | -0.78494200 | 1.77362300  | 0.00010600  |
| B | -1.80516700 | -0.50879200 | -0.00009900 |
| O | -3.01353600 | 0.12323900  | -0.00005800 |
| H | -3.74792600 | -0.51088100 | 0.00043600  |
| O | -1.72394300 | -1.86110100 | -0.00018900 |
| H | -0.79866800 | -2.17839300 | -0.00008800 |
| H | 2.50062000  | 1.82075200  | -0.00013900 |
| N | 1.60835400  | -0.91947300 | 0.00005500  |
| O | 1.01430800  | -2.01327200 | 0.00028600  |
| O | 2.83315500  | -0.81802100 | -0.00019200 |
| H | 0.31494200  | 3.53134400  | 0.00010600  |

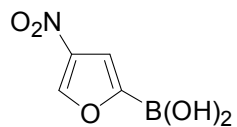

SCF energy=-610.6032589

|   |             |             |             |
|---|-------------|-------------|-------------|
| C | -0.74153000 | 1.38157500  | 0.00015700  |
| C | -1.21291600 | 0.09534500  | 0.00014400  |
| C | -0.08931100 | -0.78227500 | 0.00021300  |
| C | 1.01800600  | 0.01912000  | 0.00019900  |
| O | 0.60047600  | 1.35414200  | 0.00022800  |
| B | 2.55468700  | -0.23487600 | -0.00002400 |
| O | 2.98405600  | -1.52844500 | 0.00028300  |
| H | 3.95119900  | -1.60184300 | 0.00012100  |
| O | 3.46170100  | 0.79084800  | -0.00053200 |
| H | 3.06522100  | 1.67492200  | -0.00090500 |
| H | -1.22989300 | 2.34362200  | 0.00024800  |
| H | -0.10875700 | -1.86219200 | 0.00029600  |

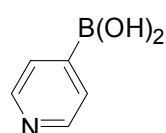

SCF energy=-424.3583455

|   |             |             |             |
|---|-------------|-------------|-------------|
| C | -1.95114800 | -1.15424300 | 0.00079000  |
| C | -0.55533500 | -1.18740300 | 0.00068200  |
| C | 0.17042400  | 0.01550900  | -0.00011000 |
| C | -0.58831500 | 1.19684300  | -0.00084300 |
| C | -1.98344100 | 1.13038100  | -0.00073700 |
| N | -2.66771600 | -0.02091400 | 0.00010900  |
| H | -2.52493300 | -2.07936400 | 0.00143100  |
| H | -0.03343100 | -2.13980600 | 0.00121000  |
| H | -0.11787600 | 2.17944800  | -0.00168200 |
| H | -2.57982100 | 2.04121000  | -0.00132000 |
| B | 1.74526200  | -0.00068400 | -0.00007100 |
| O | 2.53135900  | 1.12646100  | 0.00132900  |
| H | 2.05029800  | 1.96533100  | 0.00316700  |
| O | 2.37592900  | -1.21350000 | -0.00143900 |
| H | 3.34205300  | -1.12722000 | -0.00103000 |

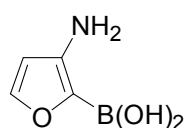

SCF energy=-461.4681076

|   |             |             |             |
|---|-------------|-------------|-------------|
| C | -1.98103200 | -1.26373600 | 0.00009200  |
| C | -2.23611900 | 0.07791900  | 0.00016300  |
| C | -0.94720000 | 0.70556500  | -0.00008700 |
| C | 0.00157400  | -0.29099700 | -0.00025100 |
| O | -0.64650100 | -1.50417900 | -0.00012500 |
| H | -2.61680100 | -2.13725400 | 0.00014500  |
| H | -3.20809800 | 0.55394000  | 0.00022500  |
| B | 1.55334800  | -0.16261700 | -0.00002400 |
| O | 2.34413400  | -1.27799800 | 0.00010200  |
| H | 3.28547800  | -1.04365200 | 0.00004800  |
| O | 2.10931500  | 1.08820100  | 0.00005200  |
| H | 1.40282300  | 1.77198000  | 0.00003300  |
| N | -0.59631300 | 2.09882900  | -0.00005700 |
| H | -0.96774200 | 2.57793100  | -0.81947600 |
| H | -0.96713600 | 2.57765000  | 0.81981100  |

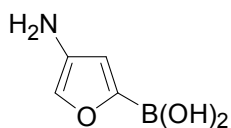

SCF energy=-461.4628897

|   |             |             |             |
|---|-------------|-------------|-------------|
| C | 1.51798200  | 1.17012700  | -0.00883200 |
| C | 1.91291000  | -0.14342700 | 0.00450900  |
| C | 0.70331600  | -0.91052100 | 0.01201700  |
| C | -0.34824900 | -0.02988100 | 0.00105900  |
| O | 0.15316200  | 1.25640000  | -0.00547500 |
| H | 2.05658400  | 2.10604100  | -0.00708800 |
| B | -1.89144300 | -0.17287100 | -0.00108800 |
| O | -2.44359200 | -1.42513700 | -0.00360900 |
| H | -3.41276100 | -1.39371100 | -0.00236900 |
| O | -2.71762800 | 0.92497500  | -0.00168400 |
| H | -2.22965900 | 1.76267100  | 0.00261800  |
| N | 3.21453100  | -0.66297000 | 0.08769600  |
| H | 3.33199200  | -1.53884600 | -0.41031100 |
| H | 3.93888300  | -0.00902900 | -0.18880600 |
| H | 0.61917100  | -1.98967500 | 0.03115800  |

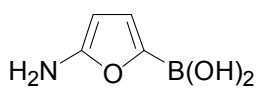

SCF energy=-461.4718521

|   |             |             |            |
|---|-------------|-------------|------------|
| C | -1.82004800 | -0.09026500 | 0.00199100 |
| C | -1.68155700 | 1.27759000  | 0.00385400 |

|   |             |             |             |
|---|-------------|-------------|-------------|
| N | -2.60341500 | -0.27276300 | -0.00008400 |
| O | -3.43544800 | 0.64024700  | 0.00004500  |
| O | -2.86988500 | -1.47596300 | -0.00044100 |

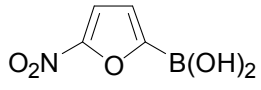

SCF energy=-610.5976718

|   |             |             |             |
|---|-------------|-------------|-------------|
| C | -1.16264400 | 0.28839600  | -0.00014800 |
| C | -0.86290300 | 1.62498900  | 0.00029200  |
| C | 0.55735600  | 1.68055600  | 0.00040100  |
| C | 1.02432700  | 0.38436400  | -0.00003800 |
| O | -0.05344600 | -0.47630700 | -0.00041800 |
| B | 2.43844300  | -0.27898800 | -0.00006600 |
| O | 3.52183600  | 0.54788000  | 0.00000400  |
| H | 4.36247400  | 0.06360500  | 0.00004800  |
| O | 2.60112100  | -1.63530900 | -0.00017300 |
| H | 1.77380700  | -2.14130400 | -0.00023900 |
| H | 1.17664800  | 2.56717100  | 0.00068400  |
| H | -1.57468500 | 2.43710500  | 0.00041000  |
| N | -2.42576600 | -0.38395200 | 0.00001200  |
| O | -3.42744100 | 0.34053400  | -0.00077400 |
| O | -2.42793400 | -1.61602300 | 0.00090000  |

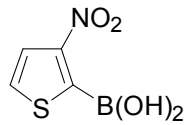

SCF energy=-933.6035587

|   |             |             |             |
|---|-------------|-------------|-------------|
| C | 0.25705700  | 2.51319300  | -0.00024500 |
| C | 1.31200400  | 1.64662800  | -0.00016300 |
| C | 0.86426900  | 0.29207800  | -0.00001600 |
| C | -0.51683200 | 0.10977900  | 0.00030200  |
| S | -1.25701800 | 1.68016000  | 0.00013600  |
| B | -1.51795100 | -1.11815600 | 0.00005400  |
| O | -1.16601700 | -2.42409500 | -0.00002500 |
| H | -0.19394300 | -2.53254400 | -0.00010100 |
| O | -2.84299900 | -0.76608300 | -0.00011400 |
| H | -3.42531700 | -1.54167200 | -0.00012100 |
| H | 2.35565800  | 1.93051800  | -0.00034300 |
| N | 1.85626800  | -0.77066400 | 0.00003200  |
| O | 1.49157000  | -1.95928000 | -0.00020800 |
| O | 3.04033800  | -0.44037700 | 0.00022800  |
| H | 0.28965100  | 3.59517700  | -0.00040600 |

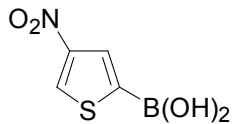

SCF energy=-933.5982379

|   |             |             |             |
|---|-------------|-------------|-------------|
| C | 1.03754500  | 1.40039700  | 0.00010500  |
| C | 1.30445000  | 0.05138300  | 0.00000400  |
| C | 0.14481600  | -0.77104900 | -0.00007100 |
| C | -1.02162500 | -0.04061200 | -0.00014200 |
| S | -0.65154200 | 1.67639000  | 0.00016200  |
| B | -2.50372500 | -0.53229700 | -0.00005500 |
| O | -2.86821200 | -1.85469200 | 0.00047400  |
| H | -2.14174600 | -2.49301500 | 0.00057900  |
| O | -3.48606000 | 0.41698000  | -0.00052200 |
| H | -4.37795200 | 0.03564100  | -0.00020300 |
| H | 1.75746200  | 2.20692200  | 0.00030300  |
| N | 2.65441900  | -0.47828100 | -0.00005500 |
| O | 2.78037700  | -1.70636300 | -0.00021700 |
| O | 3.58998800  | 0.32535000  | 0.00005400  |
| H | 0.20474800  | -1.85327300 | -0.00028400 |

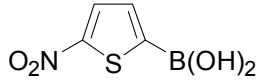

SCF energy=-933.5908182

|   |             |            |             |
|---|-------------|------------|-------------|
| C | -1.30659200 | 0.23825600 | -0.00001600 |
|---|-------------|------------|-------------|

|   |             |             |             |
|---|-------------|-------------|-------------|
| C | -0.27454400 | 1.51738600  | 0.00498300  |
| C | 0.37381700  | 0.31031900  | 0.00097800  |
| O | -0.61447800 | -0.69650600 | 0.00101300  |
| B | 1.84097100  | -0.15613400 | -0.00178900 |
| O | 2.84046800  | 0.78273300  | -0.02007800 |
| H | 3.71873100  | 0.37233100  | -0.01265900 |
| O | 2.18825800  | -1.48999100 | 0.01361000  |
| H | 1.41996800  | -2.07943300 | 0.03878400  |
| H | 0.21686100  | 2.48168500  | 0.00530300  |
| H | -2.47981400 | 2.00699800  | 0.00791100  |
| N | -2.91728100 | -0.93035600 | 0.07390600  |
| H | -3.78589300 | -0.50630700 | -0.22827100 |
| H | -2.77373000 | -1.84217800 | -0.34666200 |

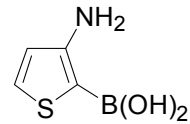

SCF energy=-784.4645216

|   |             |             |             |
|---|-------------|-------------|-------------|
| C | -2.36409200 | -0.49721100 | 0.02703400  |
| C | -2.05163700 | 0.83328700  | 0.01313800  |
| C | -0.63564900 | 1.07247700  | -0.01488000 |
| C | 0.12033000  | -0.10008100 | -0.01873800 |
| S | -0.95538200 | -1.49497100 | -0.00392100 |
| B | 1.65182800  | -0.23289800 | -0.00042900 |
| O | 2.35855800  | -1.41832000 | -0.00578500 |
| H | 1.82103700  | -2.22180000 | -0.03571700 |
| O | 2.40523900  | 0.92629700  | 0.03604500  |
| H | 3.35632700  | 0.73593700  | 0.05034400  |
| H | -2.79359500 | 1.62605900  | 0.00941400  |
| N | -0.10912200 | 2.35128100  | -0.09726000 |
| H | -0.65516900 | 3.09063100  | 0.32547000  |
| H | 0.88806200  | 2.42388700  | 0.07243900  |
| H | -3.34991900 | -0.94430500 | 0.04235100  |

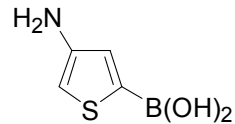

SCF energy=-784.4561087

|   |             |             |             |
|---|-------------|-------------|-------------|
| C | 1.83162900  | 0.98252200  | 0.00322400  |
| C | 1.90580900  | -0.39402500 | 0.00111300  |
| C | 0.60454200  | -0.98502300 | -0.00025500 |
| C | -0.43747600 | -0.07844300 | -0.00208000 |
| S | 0.19527100  | 1.54621100  | 0.01067600  |
| B | -1.96855900 | -0.34698300 | -0.00404700 |
| O | -2.51906600 | -1.61060900 | 0.02597300  |
| H | -1.87665300 | -2.33193900 | 0.06608900  |
| O | -2.82805100 | 0.71805800  | -0.03854300 |
| H | -3.75690200 | 0.43985100  | -0.02947400 |
| H | 2.65456100  | 1.68655700  | 0.01002700  |
| N | 3.08736400  | -1.15430600 | 0.07220100  |
| H | 3.04874500  | -2.02521300 | -0.44673400 |
| H | 3.92494700  | -0.63943500 | -0.17582700 |
| H | 0.46213100  | -2.06391500 | 0.00848600  |

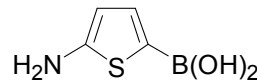

SCF energy=-784.4569426

|   |             |             |             |
|---|-------------|-------------|-------------|
| C | -1.97116700 | 0.07481900  | -0.00298100 |
| C | -1.52809900 | 1.38294100  | -0.00908200 |
| C | -0.11039200 | 1.46671100  | -0.00437400 |
| C | 0.55324500  | 0.25648800  | 0.00399800  |
| S | -0.63620900 | -1.04659800 | 0.01981200  |
| B | 2.06685300  | -0.05136500 | -0.00419300 |
| O | 3.04683700  | 0.92224000  | 0.00375000  |
| H | 2.71348200  | 1.82943000  | 0.02457100  |
| O | 2.48156700  | -1.35965000 | -0.02063200 |

|   |             |             |             |
|---|-------------|-------------|-------------|
| C | -0.83445700 | 1.53106100  | -0.00006500 |
| C | 0.57999100  | 1.54615200  | 0.00002300  |
| C | 1.16175600  | 0.28619200  | -0.00003800 |
| S | -0.05541700 | -0.95735400 | -0.00006500 |
| B | 2.67842700  | -0.10076600 | 0.00003700  |
| O | 3.69625600  | 0.81905100  | 0.00004300  |
| H | 3.42637100  | 1.74748000  | 0.00008300  |
| O | 2.99434100  | -1.42801500 | -0.00000300 |
| H | 3.95050100  | -1.59104600 | 0.00005600  |
| H | 1.15313900  | 2.46922900  | 0.00008000  |
| N | -2.69257900 | -0.15014500 | 0.00002200  |
| O | -3.53775000 | 0.74885800  | 0.00000300  |
| O | -2.94178800 | -1.36033000 | 0.00009200  |
| H | -1.48006400 | 2.40035000  | -0.00002600 |

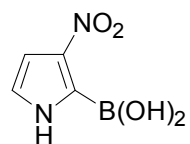

SCF energy=-590.7716862

|   |             |             |             |
|---|-------------|-------------|-------------|
| C | 0.39844500  | 2.48941000  | -0.00010200 |
| C | 1.44731900  | 1.59882300  | -0.00027200 |
| C | 0.85745900  | 0.30602500  | -0.00008100 |
| C | -0.54337500 | 0.41659600  | 0.00019800  |
| N | -0.76989500 | 1.76677100  | 0.00023000  |
| H | -1.70682600 | 2.15130000  | 0.00012600  |
| B | -1.77812700 | -0.55061400 | -0.00001300 |
| O | -1.71108600 | -1.90063000 | -0.00045800 |
| H | -0.77873200 | -2.20424200 | -0.00028600 |
| O | -2.99423200 | 0.09476600  | 0.00017400  |
| H | -3.73940000 | -0.52582000 | -0.00019200 |
| H | 2.50331200  | 1.82188900  | -0.00044900 |
| N | 1.61841700  | -0.90393900 | 0.00007000  |
| O | 1.02451500  | -2.00282400 | 0.00036400  |
| O | 2.84603400  | -0.81193500 | -0.00002900 |
| H | 0.39169000  | 3.56996700  | -0.00008800 |

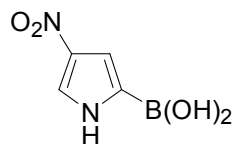

SCF energy=-590.7635787

|   |             |             |             |
|---|-------------|-------------|-------------|
| C | -0.77903200 | -1.42700700 | -0.00017600 |
| C | -1.22529600 | -0.11023500 | 0.00019700  |
| C | -0.10153500 | 0.75239400  | 0.00023800  |
| C | 1.02886600  | -0.05121400 | -0.00008000 |
| N | 0.57129300  | -1.36886600 | -0.00059400 |
| H | 1.19390500  | -2.16693600 | 0.00050400  |
| B | 2.54923400  | 0.25040500  | 0.00001300  |
| O | 3.10099900  | 1.50485500  | -0.00021400 |
| H | 2.46846500  | 2.23664800  | -0.00083600 |
| O | 3.38687700  | -0.83700400 | 0.00047300  |
| H | 4.32502500  | -0.59117200 | 0.00023400  |
| H | -1.33639700 | -2.35132900 | -0.00070700 |
| N | -2.60186500 | 0.28287900  | 0.00008400  |
| O | -2.85157000 | 1.49329000  | -0.00009200 |
| O | -3.45838600 | -0.61032700 | 0.00018200  |
| H | -0.14454100 | 1.83253600  | 0.00044100  |

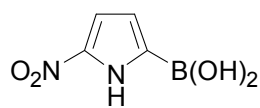

SCF energy=-590.758702

|   |             |            |             |
|---|-------------|------------|-------------|
| C | -1.19813700 | 0.26653900 | 0.00002800  |
| C | -0.85870600 | 1.61424500 | -0.00000500 |
| C | 0.54833900  | 1.65109100 | -0.00001900 |

|   |             |             |             |
|---|-------------|-------------|-------------|
| H | 3.44819500  | -1.43431700 | -0.02028500 |
| H | 0.40893200  | 2.42261900  | -0.01550700 |
| N | -3.28297200 | -0.37959800 | 0.07096800  |
| H | -3.97774100 | 0.30178700  | -0.21296500 |
| H | -3.46259300 | -1.28730100 | -0.34246800 |
| H | -2.19313600 | 2.24088500  | -0.01644700 |

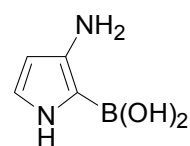

SCF energy=-441.6255869

|   |             |             |             |
|---|-------------|-------------|-------------|
| C | -2.04468300 | -1.24045600 | -0.00011600 |
| C | -2.23599900 | 0.13256000  | -0.00023400 |
| C | -0.94147500 | 0.72120900  | 0.00006600  |
| C | 0.01079800  | -0.29576400 | 0.00039000  |
| N | -0.69852300 | -1.48090600 | 0.00018100  |
| H | -0.26414000 | -2.39306400 | 0.00024000  |
| B | 1.55183100  | -0.15334500 | 0.00010400  |
| O | 2.13126200  | 1.08478700  | -0.00000300 |
| H | 1.42318300  | 1.77001500  | -0.00012900 |
| O | 2.32970000  | -1.28990700 | -0.00018900 |
| H | 3.27587300  | -1.07702600 | -0.00066700 |
| H | -3.19087500 | 0.64318300  | -0.00044300 |
| H | -2.76146900 | -2.05017700 | 0.00004300  |
| N | -0.56069400 | 2.11138700  | -0.00004300 |
| H | -0.92381500 | 2.59809000  | -0.81859300 |
| H | -0.92293500 | 2.59800000  | 0.81895000  |

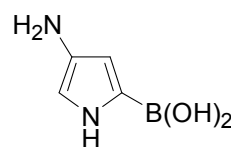

SCF energy=-441.6141907

|   |             |             |             |
|---|-------------|-------------|-------------|
| C | 1.57074000  | 1.19616500  | 0.00257800  |
| C | 1.91915300  | -0.15021500 | 0.00505300  |
| C | 0.70623800  | -0.88589200 | 0.00646100  |
| C | -0.36310000 | 0.01574800  | 0.00218800  |
| N | 0.20095900  | 1.27342200  | 0.00511400  |
| H | -0.34051200 | 2.12590300  | -0.00010600 |
| B | -1.89253100 | -0.17282700 | -0.00273100 |
| O | -2.53022800 | -1.39445400 | 0.00726300  |
| H | -1.92981800 | -2.15234300 | 0.02693500  |
| O | -2.67914100 | 0.95744600  | -0.01853200 |
| H | -3.62520100 | 0.74598600  | -0.01583100 |
| H | 2.19049400  | 2.08237600  | 0.01048000  |
| N | 3.22130000  | -0.69121200 | 0.08299400  |
| H | 3.31827400  | -1.56036100 | -0.43222500 |
| H | 3.94211500  | -0.04415000 | -0.21978900 |
| H | 0.62825500  | -1.96751500 | 0.01991000  |

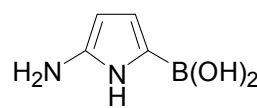

SCF energy=-441.6196457

|   |             |             |             |
|---|-------------|-------------|-------------|
| C | -1.85940800 | -0.11350900 | 0.00664900  |
| C | -1.66925000 | 1.26451900  | -0.01400800 |
| C | -0.26782600 | 1.48427000  | -0.01342400 |
| C | 0.38380200  | 0.25317700  | -0.00304700 |
| N | -0.63154300 | -0.70434400 | 0.01661200  |
| H | -0.46506400 | -1.69719400 | 0.10999900  |
| B | 1.86405800  | -0.15797300 | -0.00284900 |
| O | 2.92525200  | 0.72403000  | 0.00550500  |
| H | 2.66383000  | 1.65502200  | 0.01575200  |
| O | 2.15958200  | -1.50483900 | -0.00695000 |
| H | 3.11508700  | -1.66810400 | 0.00100600  |

|   |             |             |             |
|---|-------------|-------------|-------------|
| C | 1.03603100  | 0.33402600  | 0.00001900  |
| N | -0.06271300 | -0.48736100 | 0.00003600  |
| H | -0.04844900 | -1.50051500 | 0.00012700  |
| B | 2.47293100  | -0.26349200 | 0.00001200  |
| O | 3.62214900  | 0.48298300  | -0.00002300 |
| H | 3.49586800  | 1.44182800  | 0.00010000  |
| O | 2.56923000  | -1.62865700 | -0.00001400 |
| H | 3.48524300  | -1.94712700 | -0.00003700 |
| H | 1.15396600  | 2.54910100  | -0.00003800 |
| N | -2.47747700 | -0.35588800 | 0.00001600  |
| O | -2.50248400 | -1.59736800 | -0.00003800 |
| O | -3.47376700 | 0.37337300  | -0.00000600 |
| H | -1.55614500 | 2.43884700  | -0.00006100 |

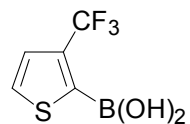

SCF energy=-1066.1880786

|   |             |             |             |
|---|-------------|-------------|-------------|
| C | 0.94158500  | -2.50248400 | 0.05136700  |
| C | -0.35808100 | -2.06644200 | 0.03393800  |
| C | -0.43997000 | -0.64330900 | 0.02193200  |
| C | 0.78900600  | 0.00492500  | 0.02636200  |
| S | 2.05550900  | -1.18912400 | 0.04246100  |
| B | 1.21512100  | 1.51755200  | 0.01353800  |
| O | 0.39551800  | 2.58094000  | 0.26250300  |
| H | -0.51422500 | 2.36255700  | 0.51303700  |
| O | 2.53460700  | 1.76590100  | -0.25693600 |
| H | 2.74256600  | 2.71253200  | -0.21739400 |
| H | -1.22015900 | -2.72225000 | 0.03009100  |
| C | -1.75894700 | 0.06349100  | -0.04831600 |
| F | -2.80337200 | -0.77838700 | 0.09698900  |
| F | -1.93971800 | 0.72603100  | -1.22021500 |
| F | -1.89570900 | 1.01893400  | 0.93442000  |
| H | 1.29469500  | -3.52562700 | 0.07022000  |

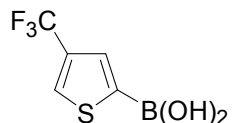

SCF energy=-1066.1869872

|   |             |             |             |
|---|-------------|-------------|-------------|
| C | 0.62936500  | 1.51152300  | 0.00660500  |
| C | 0.98324500  | 0.18381200  | 0.00602000  |
| C | -0.14804300 | -0.68383100 | 0.00221800  |
| C | -1.35591200 | -0.01943900 | 0.00065700  |
| S | -1.07830700 | 1.70807800  | 0.00295400  |
| B | -2.80487600 | -0.59665800 | -0.00133000 |
| O | -3.09065100 | -1.94049600 | 0.00737200  |
| H | -2.32509300 | -2.53107100 | 0.01778500  |
| O | -3.84844100 | 0.28605700  | -0.01226800 |
| H | -4.71147400 | -0.15650400 | -0.01194400 |
| H | 1.29054400  | 2.36778900  | 0.00979500  |
| H | -0.05228600 | -1.76590400 | 0.00205400  |
| C | 2.39426400  | -0.30836000 | -0.00061100 |
| F | 2.64450400  | -1.14703600 | 1.04128100  |
| F | 3.29194400  | 0.70230900  | 0.07519000  |
| F | 2.68253400  | -1.01382700 | -1.12852200 |

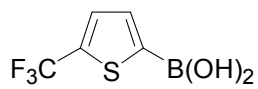

SCF energy=-1066.1822182

|   |             |             |             |
|---|-------------|-------------|-------------|
| C | -0.97707000 | 0.28288100  | -0.01470300 |
| C | -0.46228900 | 1.55755300  | -0.01427800 |
| C | 0.95784300  | 1.55380000  | -0.00727000 |
| C | 1.52013500  | 0.29100800  | -0.00116000 |
| S | 0.26872000  | -0.92247700 | -0.00560400 |
| B | 3.02466500  | -0.12542000 | 0.00279200  |

|   |             |             |             |
|---|-------------|-------------|-------------|
| H | 0.21508500  | 2.45460100  | -0.03679100 |
| H | -2.45235800 | 2.01114500  | -0.04536400 |
| N | -3.02504800 | -0.89617500 | 0.07781300  |
| H | -3.85738300 | -0.32524200 | 0.17947500  |
| H | -3.14593500 | -1.52099800 | -0.71626000 |

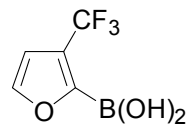

SCF energy=-743.191903

|   |             |             |             |
|---|-------------|-------------|-------------|
| C | -0.47859400 | 2.59686600  | 0.03617400  |
| C | 0.75358000  | 2.01494500  | 0.03095300  |
| C | 0.50429800  | 0.60700900  | 0.03469700  |
| C | -0.86436800 | 0.41360800  | 0.03555500  |
| O | -1.45048100 | 1.65482100  | 0.03763800  |
| B | -1.84397000 | -0.81256800 | 0.01387100  |
| O | -3.16940300 | -0.53825800 | -0.15467300 |
| H | -3.70563000 | -1.34682900 | -0.14814000 |
| O | -1.44909200 | -2.11432400 | 0.14484900  |
| H | -0.50757900 | -2.25468900 | 0.32353400  |
| H | 1.71462300  | 2.50864600  | 0.03108100  |
| H | -0.81346600 | 3.62342100  | 0.04498900  |
| C | 1.56809500  | -0.43323200 | -0.02789500 |
| F | 2.76027800  | 0.03713700  | 0.39744800  |
| F | 1.75890600  | -0.91878400 | -1.28232500 |
| F | 1.27922000  | -1.52733100 | 0.75151800  |

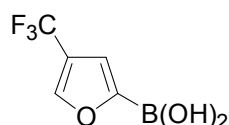

SCF energy=-743.1949147

|   |             |             |             |
|---|-------------|-------------|-------------|
| C | 0.33940700  | 1.43851400  | 0.00000600  |
| C | 0.86432000  | 0.17688000  | 0.00019500  |
| C | -0.24692600 | -0.72528200 | 0.00054000  |
| C | -1.38188300 | 0.03865700  | 0.00024500  |
| O | -1.00856100 | 1.37904200  | 0.00045400  |
| B | -2.90694000 | -0.26637800 | -0.00012900 |
| O | -3.30223900 | -1.57256300 | -0.00000900 |
| H | -4.26738100 | -1.66760700 | -0.00025200 |
| O | -3.84711000 | 0.73102400  | -0.00044900 |
| H | -3.47115500 | 1.62418900  | -0.00007400 |
| H | 0.78597900  | 2.42133700  | -0.00016000 |
| C | 2.30912100  | -0.17542300 | -0.00007700 |
| F | 3.09508300  | 0.93080300  | 0.00025300  |
| F | 2.65575000  | -0.91359400 | 1.08658500  |
| F | 2.65554900  | -0.91277000 | -1.08739800 |
| H | -0.21114500 | -1.80608100 | 0.00076100  |

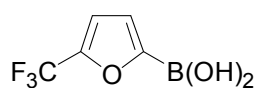

SCF energy=-743.1902735

|   |             |             |             |
|---|-------------|-------------|-------------|
| C | -0.82635400 | 0.41924800  | 0.00011400  |
| C | -0.44784000 | 1.73127100  | 0.00027500  |
| C | 0.98002100  | 1.71693700  | 0.00012800  |
| C | 1.38145700  | 0.40487800  | -0.00016400 |
| O | 0.25408600  | -0.39938600 | -0.00014400 |
| B | 2.75677000  | -0.32519000 | -0.00006900 |
| O | 3.88804000  | 0.43833500  | -0.00029700 |
| H | 4.69647300  | -0.09756800 | -0.00004700 |
| O | 2.85451300  | -1.69102900 | 0.00034800  |
| H | 1.99969800  | -2.14809600 | 0.00043800  |
| H | 1.64089200  | 2.57302400  | 0.00012100  |
| H | -1.10606300 | 2.58846100  | 0.00051600  |
| C | -2.16333900 | -0.23802800 | -0.00002600 |
| F | -3.14190200 | 0.69429400  | 0.00108500  |
| F | -2.34783900 | -1.02837600 | -1.08721200 |

|   |             |             |             |
|---|-------------|-------------|-------------|
| O | 4.06126400  | 0.77624500  | 0.01560700  |
| H | 3.80257500  | 1.70780000  | 0.02566600  |
| O | 3.32455700  | -1.45806900 | -0.00678600 |
| H | 4.27943500  | -1.62772900 | -0.00249800 |
| H | 1.54282800  | 2.46968800  | -0.00932700 |
| C | -2.42432600 | -0.08694800 | 0.00136700  |
| F | -2.79076800 | -0.69172000 | 1.16261200  |
| F | -3.21196200 | 1.00509200  | -0.14247700 |
| F | -2.74648300 | -0.95205600 | -0.99479400 |
| H | -1.07708800 | 2.44995200  | -0.02051900 |

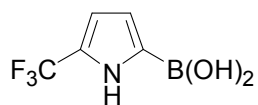

SCF energy=-723.3462432

|   |             |             |             |
|---|-------------|-------------|-------------|
| C | -0.84915500 | 0.36746500  | -0.02165100 |
| C | -0.44292500 | 1.69334100  | -0.01122100 |
| C | 0.97144800  | 1.68077700  | 0.00161900  |
| C | 1.40578800  | 0.35374100  | -0.00017200 |
| N | 0.26566600  | -0.42328400 | -0.01168500 |
| H | 0.27678700  | -1.43518100 | -0.03095300 |
| B | 2.80888600  | -0.30459600 | 0.00276300  |
| O | 3.99467200  | 0.38714200  | 0.01291500  |
| H | 3.90522700  | 1.35009900  | 0.01804000  |
| O | 2.85287200  | -1.67618300 | -0.00534900 |
| H | 3.75810500  | -2.02380500 | -0.00357000 |
| H | 1.60841900  | 2.55703400  | 0.00774700  |
| H | -1.09692400 | 2.55404400  | -0.01475600 |
| C | -2.21491900 | -0.21597600 | -0.00039000 |
| F | -3.15561400 | 0.71650600  | -0.26011700 |
| F | -2.35472200 | -1.21477300 | -0.91799500 |
| F | -2.52938500 | -0.77728800 | 1.20275900  |

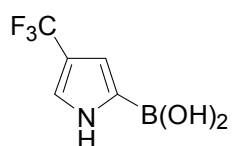

SCF energy=-723.351531

|   |             |             |             |
|---|-------------|-------------|-------------|
| C | 0.37286600  | 1.49073900  | -0.00138600 |
| C | 0.87344800  | 0.19698200  | -0.00163100 |
| C | -0.23636000 | -0.68901900 | -0.00091300 |
| C | -1.39719000 | 0.07558400  | -0.00029700 |
| N | -0.98215000 | 1.40030000  | -0.00062100 |
| H | -1.62435200 | 2.18160600  | -0.00086900 |
| B | -2.90320900 | -0.28103400 | 0.00036600  |
| O | -3.40735300 | -1.55804200 | -0.00062500 |
| H | -2.74291900 | -2.26083400 | -0.00269000 |
| O | -3.78985500 | 0.76832600  | 0.00188300  |
| H | -4.71449200 | 0.47594700  | 0.00180400  |
| H | 0.88908100  | 2.43967900  | -0.00230200 |
| C | 2.30826600  | -0.17978900 | 0.00004000  |
| F | 3.11941700  | 0.91000200  | -0.01936500 |
| F | 2.65585200  | -0.91059900 | 1.09694200  |
| F | 2.64850000  | -0.94520400 | -1.07507900 |
| H | -0.17866200 | -1.77037200 | -0.00083700 |

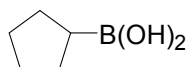

SCF energy=-372.6048645

|   |             |             |             |
|---|-------------|-------------|-------------|
| C | -2.22032400 | 0.78302100  | 0.32636300  |
| C | -0.71315100 | 1.08526200  | 0.54671000  |
| C | 0.03924500  | 0.11565600  | -0.40905100 |
| C | -0.83244200 | -1.15500500 | -0.32408800 |
| C | -2.28529000 | -0.62804400 | -0.33057000 |
| H | -2.77490400 | 0.81953100  | 1.27110900  |
| H | -2.67194500 | 1.53463700  | -0.33156500 |

|   |             |             |            |
|---|-------------|-------------|------------|
| F | -2.34710800 | -1.03025800 | 1.08591700 |
|---|-------------|-------------|------------|

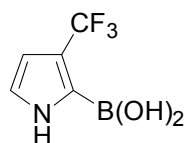

SCF energy=-723.3538111

|   |             |             |             |
|---|-------------|-------------|-------------|
| C | -0.49249200 | 2.62751300  | 0.02564800  |
| C | 0.74741300  | 2.01679100  | 0.03843200  |
| C | 0.51054700  | 0.61683200  | 0.04153300  |
| C | -0.87148300 | 0.38918500  | 0.02552400  |
| N | -1.44008700 | 1.64499600  | 0.01651500  |
| H | -2.44215600 | 1.78480500  | 0.00785900  |
| B | -1.81211900 | -0.85244600 | 0.00978300  |
| O | -1.43435100 | -2.15973000 | 0.10842200  |
| H | -0.48645100 | -2.29797000 | 0.25687700  |
| O | -3.15285300 | -0.56346200 | -0.11238700 |
| H | -3.70289000 | -1.36198000 | -0.09989800 |
| H | 1.70931400  | 2.50937600  | 0.04875500  |
| H | -0.76206700 | 3.67417500  | 0.02832400  |
| C | 1.57980500  | -0.41063700 | -0.02026500 |
| F | 2.76437100  | 0.04981900  | 0.43986900  |
| F | 1.28183400  | -1.53085700 | 0.72573300  |
| F | 1.80716700  | -0.87604100 | -1.28115200 |

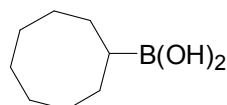

SCF energy=-490.5390877

|   |             |             |             |
|---|-------------|-------------|-------------|
| C | -2.80958500 | -0.39658200 | -0.23261500 |
| C | -2.46800100 | 1.00817200  | 0.31012300  |
| C | 0.14446700  | -0.97376200 | -0.82125400 |
| C | -1.30015800 | 1.77907200  | -0.35681700 |
| C | 0.92539100  | 0.36378100  | -0.63391800 |
| C | 0.13938400  | 1.46879400  | 0.11461500  |
| H | -2.67699000 | -0.38886600 | -1.32395400 |
| H | -2.29699300 | 0.96131700  | 1.39655900  |
| H | -1.37408200 | 1.67239400  | -1.45036500 |
| H | -0.61407900 | -0.82762100 | -1.59931000 |
| H | 1.12535300  | 0.74139500  | -1.65270400 |
| H | -3.88267000 | -0.57563600 | -0.07714700 |
| H | -3.36542700 | 1.62848400  | 0.18011100  |
| H | 0.82475000  | -1.73539500 | -1.22801200 |
| H | -1.47743500 | 2.84432800  | -0.15464800 |
| H | 0.73100900  | 2.39051400  | 0.02566900  |
| H | 0.12163900  | 1.25272700  | 1.18991100  |
| C | -2.06692000 | -1.60191700 | 0.38033800  |
| H | -2.33868500 | -2.49143300 | -0.20744800 |
| H | -2.45689500 | -1.78076100 | 1.39291500  |
| C | -0.53161800 | -1.50120300 | 0.46775400  |
| H | -0.26383000 | -0.85790100 | 1.31306200  |
| H | -0.13746900 | -2.49296100 | 0.72479900  |
| B | 2.33575900  | 0.07628000  | 0.04243000  |
| O | 2.52741300  | 0.30003800  | 1.38048500  |
| H | 3.42364600  | 0.05674400  | 1.66319500  |
| O | 3.41458000  | -0.43598900 | -0.65276000 |
| H | 3.24565600  | -0.56926400 | -1.59593400 |

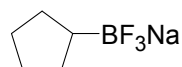

SCF energy=-682.9085354

|    |             |             |             |
|----|-------------|-------------|-------------|
| B  | 0.81543900  | -0.02302900 | -0.19381900 |
| F  | 1.57530300  | -1.21324800 | -0.56040600 |
| F  | 1.58589700  | 1.05365500  | -0.80772200 |
| F  | 1.12526500  | 0.13117200  | 1.22629000  |
| Na | 3.18646500  | 0.02802100  | 0.36923800  |
| C  | -0.72704500 | -0.05626700 | -0.56023700 |

|   |             |             |             |
|---|-------------|-------------|-------------|
| H | -0.43752100 | 0.87066100  | 1.58934600  |
| H | -0.45700900 | 2.13352200  | 0.36012700  |
| H | -0.05207100 | 0.52467100  | -1.42763100 |
| H | -0.63747900 | -1.86883000 | -1.13374400 |
| H | -0.64549500 | -1.68600600 | 0.62456600  |
| H | -2.64259800 | -0.54912400 | -1.36468500 |
| H | -2.97363200 | -1.30335700 | 0.19045700  |
| B | 1.58166100  | -0.01815100 | -0.08056600 |
| O | 2.13091500  | -1.01353900 | 0.70123200  |
| H | 1.48602700  | -1.66752100 | 1.00545700  |
| O | 2.44546600  | 0.92727200  | -0.57033600 |
| H | 3.35904900  | 0.76736700  | -0.28396000 |

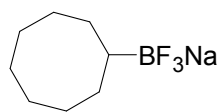

SCF energy=-800.8428766

|    |             |             |             |
|----|-------------|-------------|-------------|
| B  | 1.64299100  | 0.12262600  | 0.20704900  |
| F  | 2.48837100  | 1.31045400  | 0.12629300  |
| F  | 2.43666300  | -0.77654900 | 1.04001900  |
| F  | 1.78939700  | -0.46351800 | -1.12266200 |
| Na | 3.93671000  | -0.26321500 | -0.53179100 |
| C  | 0.15236300  | 0.37923800  | 0.71366800  |
| C  | -0.63038100 | -0.94616700 | 0.92454800  |
| H  | 0.26169100  | 0.83814600  | 1.71149500  |
| C  | -0.55307600 | 1.42761000  | -0.18313000 |
| C  | -1.26725000 | -1.54308700 | -0.35521300 |
| H  | -1.41607500 | -0.78132600 | 1.67311200  |
| H  | 0.04752100  | -1.67786300 | 1.38145300  |
| H  | -0.51471500 | 1.11345900  | -1.23614400 |
| H  | 0.05698400  | 2.33937900  | -0.13623300 |
| C  | -2.01068000 | 1.81864000  | 0.15549800  |
| C  | -2.80656900 | -1.60361900 | -0.32909800 |
| H  | -0.94581400 | -0.96978400 | -1.23094300 |
| H  | -0.89051300 | -2.56023900 | -0.52683900 |
| C  | -3.15872500 | 1.00638300  | -0.49407400 |
| H  | -2.15138200 | 1.83022600  | 1.24773000  |
| H  | -2.14737100 | 2.85996300  | -0.16978100 |
| C  | -3.54482200 | -0.33968400 | 0.15614700  |
| H  | -3.16180500 | -1.85359000 | -1.34025700 |
| H  | -3.12405900 | -2.43761900 | 0.31531500  |
| H  | -2.93860100 | 0.85896200  | -1.56301700 |
| H  | -4.05124900 | 1.64736500  | -0.46386100 |
| H  | -4.61674100 | -0.51328100 | -0.01633100 |
| H  | -3.44167200 | -0.24093200 | 1.24582700  |

### Radicals:

H<sub>2</sub>C=CH• SCF energy=-77.8995094

|   |             |             |            |
|---|-------------|-------------|------------|
| C | 0.04894900  | 0.72398000  | 0.00000000 |
| H | -0.67678200 | 1.52819600  | 0.00000000 |
| C | 0.04894900  | -0.58885300 | 0.00000000 |
| H | -0.88172100 | -1.16842200 | 0.00000000 |
| H | 0.97111000  | -1.17053400 | 0.00000000 |

H<sub>3</sub>CHC=CH• SCF energy=-117.2164276

|   |             |             |             |
|---|-------------|-------------|-------------|
| C | 1.31908300  | -0.31973400 | -0.00006700 |
| H | 2.38621600  | -0.13534500 | 0.00025100  |
| C | 0.21178700  | 0.39071800  | -0.00003800 |
| H | 0.29800800  | 1.48718400  | 0.00003500  |
| C | -1.19627700 | -0.15370300 | -0.00002500 |
| H | -1.74635500 | 0.19626500  | 0.88331300  |
| H | -1.74683700 | 0.19578100  | -0.88323600 |
| H | -1.19859100 | -1.24757400 | 0.00041900  |

|   |             |             |             |
|---|-------------|-------------|-------------|
| C | 1.52932800  | -1.20924800 | 0.09212300  |
| C | -1.51821400 | 1.23516400  | -0.16778300 |
| H | -0.80447600 | -0.18282100 | -1.65182700 |
| C | -2.98985900 | -0.73561700 | 0.00782300  |
| H | -1.24117400 | -1.32735200 | 1.14710500  |
| H | -1.35676000 | -2.17277000 | -0.40229800 |
| C | -2.90027500 | 0.76049200  | 0.37124100  |
| H | -1.63091600 | 1.89599500  | -1.03524500 |
| H | -0.98792800 | 1.81502200  | 0.59691200  |
| H | -3.35538400 | -0.85483400 | -1.02264200 |
| H | -3.67042000 | -1.29375700 | 0.66346800  |
| H | -3.73571000 | 1.34457000  | -0.03374100 |
| H | -2.93540100 | 0.87150300  | 1.46329400  |

H<sub>3</sub>CHC=C•  
CH<sub>3</sub> SCF energy=-156.5369412

|   |             |             |             |
|---|-------------|-------------|-------------|
| C | 0.55977500  | -0.27426700 | 0.00007900  |
| C | -0.56945200 | 0.40402600  | 0.00001300  |
| H | -0.51211500 | 1.50406800  | 0.00008600  |
| C | -1.96243100 | -0.17843900 | -0.00002600 |
| H | -2.52552700 | 0.15198300  | -0.88321000 |
| H | -1.93327900 | -1.27241000 | 0.00007800  |
| H | -2.52566900 | 0.15213800  | 0.88301900  |
| C | 2.01602500  | -0.04904200 | -0.00002300 |
| H | 2.49307000  | -0.49075200 | -0.88426300 |
| H | 2.24692900  | 1.03126400  | -0.00058900 |
| H | 2.49309200  | -0.48995200 | 0.88461900  |



|                                                                                                            |             |             |             |                                                                                           |             |             |             |
|------------------------------------------------------------------------------------------------------------|-------------|-------------|-------------|-------------------------------------------------------------------------------------------|-------------|-------------|-------------|
| $(\text{H}_3\text{C})_2\text{C}=\text{CH}\bullet$ SCF energy=-156.5351293                                  |             |             |             | $\text{H}_3\text{CCH}_2\text{CHC}=\text{CH}\bullet$ SCF energy=-156.5303901               |             |             |             |
| C                                                                                                          | -0.33057300 | 1.47090000  | -0.00001800 | C                                                                                         | 1.90945800  | -0.05483300 | -0.34164300 |
| H                                                                                                          | -1.23595700 | 2.06657400  | 0.00022100  | H                                                                                         | 2.90521400  | -0.47922000 | -0.30870900 |
| C                                                                                                          | -0.01695100 | 0.18930200  | -0.00010300 | C                                                                                         | 0.80166500  | -0.11555400 | 0.36484500  |
| C                                                                                                          | 1.41782400  | -0.29641100 | 0.00000200  | H                                                                                         | 0.78448100  | -0.75844400 | 1.25827200  |
| H                                                                                                          | 1.61442400  | -0.91942400 | 0.88353900  | C                                                                                         | -0.49171500 | 0.61031100  | 0.06466800  |
| H                                                                                                          | 1.61435100  | -0.92013700 | -0.88299300 | H                                                                                         | -0.72552400 | 1.27690300  | 0.90775300  |
| H                                                                                                          | 2.12534200  | 0.53720600  | -0.00025600 | H                                                                                         | -0.35426400 | 1.24662200  | -0.81683800 |
| C                                                                                                          | -1.08286300 | -0.89746700 | 0.00003000  | C                                                                                         | -1.66915400 | -0.35421600 | -0.15560000 |
| H                                                                                                          | -0.97405500 | -1.53990400 | -0.88463600 | H                                                                                         | -2.59796400 | 0.20036400  | -0.33494900 |
| H                                                                                                          | -0.97363000 | -1.54023200 | 0.88435400  | H                                                                                         | -1.48708200 | -1.00398200 | -1.01932500 |
| H                                                                                                          | -2.09509400 | -0.48202700 | 0.00030700  | H                                                                                         | -1.82637900 | -0.99649500 | 0.72017800  |
| $\text{H}_2\text{C}=\text{C}\bullet$<br> <br>$\text{CH}_3$ SCF energy=-117.2203814                         |             |             |             | $\text{CH}_3\bullet$ SCF energy=-39.8299442                                               |             |             |             |
| C                                                                                                          | -0.12423100 | -0.38187500 | 0.00016900  | C                                                                                         | 0.00000000  | 0.00000000  | 0.00000000  |
| C                                                                                                          | -1.34907400 | 0.09821700  | -0.00002200 | H                                                                                         | 0.00000000  | 1.08405000  | 0.00000000  |
| C                                                                                                          | 1.27541100  | 0.07659300  | -0.00003300 | H                                                                                         | -0.93881500 | -0.54202500 | 0.00000000  |
| H                                                                                                          | 1.81506200  | -0.28679200 | 0.88352400  | H                                                                                         | 0.93881500  | -0.54202500 | 0.00000000  |
| H                                                                                                          | 1.81404700  | -0.28533600 | -0.88486200 | $\text{C}_2\text{H}_5\bullet$ SCF energy=-79.144171                                       |             |             |             |
| H                                                                                                          | 1.33135700  | 1.17947400  | 0.00087600  | C                                                                                         | 0.00965000  | 0.79584000  | 0.00000000  |
| H                                                                                                          | -2.22918300 | -0.54365900 | -0.00031900 | H                                                                                         | -0.05850700 | 1.35504200  | 0.92844000  |
| H                                                                                                          | -1.54391700 | 1.17870300  | 0.00009700  | H                                                                                         | -0.05850700 | 1.35504200  | -0.92844000 |
| $\text{H}_2\text{C}=\text{C}\bullet$<br> <br>$\text{CH}_2\text{CH}_3$ SCF energy=-156.5342737              |             |             |             | $\text{C}_2\text{H}_5\bullet$ SCF energy=-79.144171                                       |             |             |             |
| C                                                                                                          | 0.73114500  | -0.03987200 | -0.36400300 | C                                                                                         | 0.00965000  | -0.69521000 | 0.00000000  |
| C                                                                                                          | 1.94593100  | -0.17812200 | 0.12289700  | H                                                                                         | -1.01555300 | -1.10853800 | 0.00000000  |
| C                                                                                                          | -0.55929000 | 0.59954200  | -0.04021200 | H                                                                                         | 0.50838100  | -1.10266500 | -0.88850300 |
| H                                                                                                          | -0.80134600 | 1.34208300  | -0.81391600 | H                                                                                         | 0.50838100  | -1.10266500 | 0.88850300  |
| H                                                                                                          | -0.44744200 | 1.16504800  | 0.90400600  | $\text{B}(\text{OH})_2\bullet$ SCF energy=-176.5509514                                    |             |             |             |
| H                                                                                                          | 2.71973900  | -0.75124000 | -0.38633800 | B                                                                                         | 0.00001400  | 0.47804400  | -0.00001800 |
| H                                                                                                          | 2.23958900  | 0.28369700  | 1.07474000  | O                                                                                         | 1.17573200  | -0.19626300 | 0.00001800  |
| C                                                                                                          | -1.72587000 | -0.39753000 | 0.09022700  | H                                                                                         | 1.95494100  | 0.37502200  | -0.00003800 |
| H                                                                                                          | -2.65602400 | 0.13123200  | 0.32816400  | O                                                                                         | -1.17576700 | -0.19630600 | -0.00002000 |
| H                                                                                                          | -1.87465300 | -0.94867200 | -0.84483900 | H                                                                                         | -1.95473300 | 0.37531300  | 0.00014500  |
| H                                                                                                          | -1.53135300 | -1.12625300 | 0.88472100  | $\text{B}(\text{OH})_2\bullet$<br> <br>$\text{CH}(\text{CH}_3)_2$ SCF energy=-219.1991128 |             |             |             |
| $(\text{CH}_3)_3\text{C}-\text{CH}\bullet$<br> <br>$\text{CH}_3$ SCF energy=-236.4087037                   |             |             |             | $\text{B}(\text{OH})_2\bullet$<br> <br>$\text{CH}(\text{CH}_3)_2$ SCF energy=-219.1991128 |             |             |             |
| C                                                                                                          | 0.89204000  | -0.69949100 | -0.32789000 | B                                                                                         | 0.99692500  | 0.00006700  | -0.51573700 |
| H                                                                                                          | 0.84714600  | -1.76870300 | -0.53316100 | C                                                                                         | -0.37604000 | 0.00003900  | 0.26747300  |
| C                                                                                                          | -0.41784800 | -0.01165200 | -0.01753300 | H                                                                                         | -0.14957700 | 0.00015200  | 1.35286200  |
| C                                                                                                          | 2.23336700  | -0.09147900 | -0.06604000 | O                                                                                         | 2.24012500  | 0.00013400  | -0.00976300 |
| H                                                                                                          | 2.37552900  | 0.17393000  | 0.99730800  | H                                                                                         | 2.30470700  | 0.00039000  | 0.96741200  |
| H                                                                                                          | 3.04031500  | -0.78107300 | -0.33609800 | C                                                                                         | -1.19550800 | 1.27126700  | -0.04377100 |
| H                                                                                                          | 2.38974100  | 0.83895900  | -0.63211400 | H                                                                                         | -1.45061300 | 1.32122200  | -1.10919600 |
| C                                                                                                          | -1.54619300 | -0.67649100 | -0.83471000 | H                                                                                         | -2.13313800 | 1.27468300  | 0.52774200  |
| H                                                                                                          | -2.51931100 | -0.22631400 | -0.60017700 | H                                                                                         | -0.64778400 | 2.18731800  | 0.20970100  |
| H                                                                                                          | -1.37015400 | -0.56490600 | -1.91155200 | C                                                                                         | -1.19502200 | -1.27148400 | -0.04371900 |
| H                                                                                                          | -1.61186600 | -1.74982700 | -0.61456200 | H                                                                                         | -0.64669800 | -2.18744000 | 0.20885500  |
| C                                                                                                          | -0.73728900 | -0.16992200 | 1.49551400  | H                                                                                         | -2.13221400 | -1.27562800 | 0.52849000  |
| H                                                                                                          | -0.81499000 | -1.22824300 | 1.77260900  | H                                                                                         | -1.45088500 | -1.32102900 | -1.10898300 |
| H                                                                                                          | 0.04353800  | 0.28587100  | 2.11625000  | $\text{B}(\text{F})_2\bullet$ SCF energy=-224.6008483                                     |             |             |             |
| H                                                                                                          | -1.69071000 | 0.31662800  | 1.74326600  | B                                                                                         | 0.00000000  | 0.00000000  | 0.50759900  |
| C                                                                                                          | -0.36205300 | 1.49357900  | -0.35968600 | F                                                                                         | 0.00000000  | 1.14812900  | -0.14100000 |
| H                                                                                                          | -0.12763400 | 1.64967100  | -1.42003800 | F                                                                                         | 0.00000000  | -1.14812900 | -0.14100000 |
| H                                                                                                          | -1.32934800 | 1.96932800  | -0.15460500 | $(\text{CH}_3)_2\text{CH}\bullet$ SCF energy=-118.4604299                                 |             |             |             |
| H                                                                                                          | 0.39559700  | 2.01740800  | 0.23495000  | C                                                                                         | 0.01018200  | 0.53712000  | 0.00000000  |
| $\text{H}_3\text{C}-\text{CH}(\text{CH}_3)-\text{CH}\bullet$<br> <br>$\text{CH}_3$ SCF energy=-197.0899191 |             |             |             | $(\text{CH}_3)_2\text{CH}\bullet$ SCF energy=-118.4604299                                 |             |             |             |
| C                                                                                                          | 0.87210800  | -0.38960400 | 0.62296600  | H                                                                                         | -0.21267400 | 1.60190200  | 0.00000000  |
| H                                                                                                          | 1.11473800  | -1.16192000 | 1.35157100  | C                                                                                         | 0.01018200  | -0.19814800 | 1.30019700  |
| C                                                                                                          | -0.58018100 | -0.01837900 | 0.47904000  | H                                                                                         | 0.20076500  | 0.46849100  | 2.14901200  |
| H                                                                                                          | -1.03094200 | -0.05848100 | 1.48276500  | H                                                                                         | -0.95721600 | -0.69893000 | 1.49410700  |



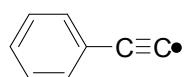

SCF energy=-307.7073086

|   |             |             |             |
|---|-------------|-------------|-------------|
| C | 2.07770800  | 0.00002300  | -0.01678700 |
| C | -3.36043600 | -0.00001700 | 0.01946600  |
| C | -0.67983000 | 0.00001500  | -0.00677200 |
| C | 0.04684000  | -1.22708300 | -0.00340600 |
| C | 0.04686800  | 1.22710400  | -0.00339900 |
| C | 1.43386300  | -1.21988800 | 0.00223000  |
| H | -0.51012700 | -2.15872800 | -0.00524300 |
| C | 1.43389000  | 1.21986900  | 0.00222500  |
| H | -0.51008500 | 2.15875900  | -0.00523400 |
| C | 2.12943100  | -0.00001900 | 0.00501300  |
| H | 1.98318500  | -2.15712000 | 0.00468300  |
| H | 1.98323500  | 2.15708800  | 0.00467000  |
| H | 3.21628900  | -0.00003400 | 0.00971100  |

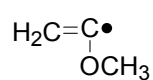

SCF energy=-192.440436

|   |             |             |             |
|---|-------------|-------------|-------------|
| C | -0.63137800 | -0.25746600 | -0.29394300 |
| C | -1.85688900 | -0.03857200 | 0.16190900  |
| H | -2.67304300 | -0.70004300 | -0.10744100 |
| H | -2.07234500 | 0.80144200  | 0.82617400  |
| O | 0.46558500  | 0.48688000  | -0.22010800 |
| C | 1.67218300  | -0.19560500 | 0.17249000  |
| H | 2.45704700  | 0.56172700  | 0.17303600  |
| H | 1.55333000  | -0.62275600 | 1.17401800  |
| H | 1.90683700  | -0.98554200 | -0.54766100 |

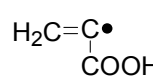

SCF energy=-266.4877224

|   |             |             |             |
|---|-------------|-------------|-------------|
| C | 0.87687800  | -0.03529600 | -0.16668500 |
| C | 2.15750200  | -0.05211100 | 0.06179600  |
| H | 2.88691700  | -0.15897000 | -0.74309500 |
| H | 2.56502800  | 0.03561000  | 1.07377800  |
| C | -0.52931800 | 0.11088300  | -0.02436200 |
| O | -1.18478500 | -1.08319000 | 0.02663700  |
| H | -2.13583000 | -0.87589000 | 0.09736000  |
| O | -1.10852500 | 1.19049000  | 0.01679600  |

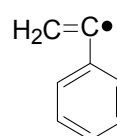

SCF energy=-308.9936799

|   |             |             |             |
|---|-------------|-------------|-------------|
| C | -3.22908700 | -0.00010400 | -0.00034200 |
| H | -3.81242700 | 0.00030400  | -0.92610000 |
| C | -1.92507300 | 0.00031900  | 0.00042300  |
| H | -3.81342500 | -0.00061100 | 0.92477300  |
| C | -0.55116900 | 0.00025500  | 0.00024300  |
| C | 0.19169000  | -1.22857500 | 0.00011600  |
| C | 0.19213600  | 1.22879000  | 0.00015400  |
| C | 1.57740300  | -1.21411800 | -0.00012200 |
| H | -0.35268200 | -2.16826800 | 0.00018400  |
| C | 1.57786500  | 1.21382400  | -0.00004900 |
| H | -0.35174700 | 2.16876900  | 0.00010900  |
| C | 2.28570300  | -0.00026400 | -0.00014900 |
| H | 2.12035100  | -2.15620600 | -0.00022200 |
| H | 2.12111400  | 2.15573900  | -0.00013300 |
| H | 3.37200700  | -0.00049200 | -0.00025900 |

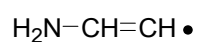

SCF energy=-133.2613215

|   |             |             |             |
|---|-------------|-------------|-------------|
| C | -0.13885100 | 0.44054500  | -0.00827600 |
| H | -0.05239000 | 1.52820100  | -0.03230000 |
| C | -1.33863300 | -0.11486400 | 0.02821900  |
| H | -1.80801900 | -1.08801200 | -0.00180700 |
| N | 1.11183200  | -0.20773400 | -0.09057500 |

|   |             |             |             |
|---|-------------|-------------|-------------|
| C | -1.08367000 | 0.00012800  | -0.00000500 |
| C | -2.36768400 | 0.00005700  | 0.00005600  |
| N | 0.22478000  | 0.00001500  | -0.00022800 |
| C | 0.99811100  | -1.24826800 | 0.00004500  |
| H | 0.30783200  | -2.09123200 | -0.00093200 |
| H | 1.63571700  | -1.28911100 | -0.89140500 |
| H | 1.63399800  | -1.28977400 | 0.89269200  |
| C | 0.99833900  | 1.24814400  | 0.00005100  |
| H | 1.63517200  | 1.28937200  | -0.89193900 |
| H | 0.30822500  | 2.09124600  | 0.00013600  |
| H | 1.63501700  | 1.28902800  | 0.89215900  |

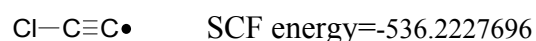

SCF energy=-536.2227696

|    |             |             |            |
|----|-------------|-------------|------------|
| C  | 0.00000000  | 0.70895300  | 0.00000000 |
| C  | 0.48471700  | 1.89681500  | 0.00000000 |
| Cl | -0.17107700 | -0.91968300 | 0.00000000 |

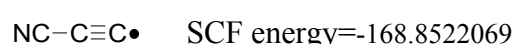

SCF energy=-168.8522069

|   |             |             |            |
|---|-------------|-------------|------------|
| C | 0.16989300  | -0.72425400 | 0.00000000 |
| C | -0.03398700 | -1.98613500 | 0.00000000 |
| C | 0.00000000  | 0.62006100  | 0.00000000 |
| N | -0.11649100 | 1.79171000  | 0.00000000 |

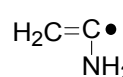

SCF energy=-133.2724356

|   |             |             |             |
|---|-------------|-------------|-------------|
| C | -0.06513200 | -0.41948000 | -0.04153500 |
| C | -1.28146000 | 0.10878700  | 0.01601200  |
| H | -2.16052100 | -0.47191100 | -0.24797500 |
| H | -1.44867600 | 1.13078100  | 0.37127900  |
| N | 1.18326200  | 0.13040800  | 0.05077100  |
| H | 1.47146900  | 0.76628200  | -0.68739700 |
| H | 1.93445200  | -0.47384800 | 0.36183000  |

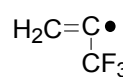

SCF energy=-414.9868411

|   |             |             |             |
|---|-------------|-------------|-------------|
| C | -1.01075400 | -0.56199900 | -0.00112200 |
| C | -2.22365800 | -0.06477300 | -0.00016000 |
| H | -2.39530200 | 1.01601800  | 0.00196100  |
| H | -3.10667200 | -0.70137700 | -0.00079600 |
| C | 0.37136400  | -0.04224500 | 0.00016500  |
| F | 1.05959700  | -0.45549700 | 1.09035900  |
| F | 1.06049600  | -0.45397300 | -1.09044000 |
| F | 0.39993600  | 1.32052200  | 0.00069600  |

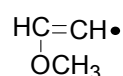

SCF energy=-192.43425

|   |             |             |             |
|---|-------------|-------------|-------------|
| C | -0.83646300 | -0.52244400 | 0.00003400  |
| H | -1.34726600 | -1.48313700 | 0.00012500  |
| C | -1.49751500 | 0.62049700  | -0.00001000 |
| H | -1.37731500 | 1.69149800  | -0.00008500 |
| O | 0.52060200  | -0.72074100 | -0.00006500 |
| C | 1.32406100  | 0.45582300  | 0.00002900  |
| H | 2.36078400  | 0.11546000  | 0.00038300  |
| H | 1.12951000  | 1.05931200  | -0.89646000 |
| H | 1.12897000  | 1.05953900  | 0.89624500  |

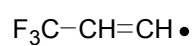

SCF energy=-414.989447

|   |             |             |             |
|---|-------------|-------------|-------------|
| C | -1.02836300 | -0.69692700 | 0.00001000  |
| H | -0.96834600 | -1.78525300 | -0.00004800 |
| C | -2.17148900 | -0.05372200 | 0.00004100  |
| H | -2.53243400 | 0.96583500  | 0.00010300  |
| C | 0.31622900  | -0.01212100 | 0.00003800  |
| F | 1.04468300  | -0.36781700 | -1.08887700 |
| F | 1.04511500  | -0.36846100 | 1.08842200  |
| F | 0.22159200  | 1.33583800  | 0.00038900  |

|   |            |             |            |
|---|------------|-------------|------------|
| H | 1.85372300 | 0.25847300  | 0.42167700 |
| H | 1.08876800 | -1.19860800 | 0.12679900 |

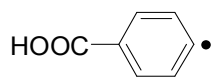

SCF energy=-420.1717637

|   |             |             |             |
|---|-------------|-------------|-------------|
| C | -0.50443700 | -1.21088300 | 0.00013000  |
| C | -1.90609600 | -1.26067000 | 0.00009200  |
| C | -2.56820800 | -0.05081300 | -0.00001900 |
| C | -1.97902500 | 1.19703000  | -0.00010900 |
| C | -0.57843900 | 1.22794500  | -0.00009800 |
| C | 0.15516900  | 0.02986800  | 0.00002800  |
| H | -2.55814800 | 2.11632600  | -0.00020000 |
| H | -0.04320500 | 2.17298800  | -0.00018300 |
| H | -2.42999300 | -2.21256200 | 0.00015800  |
| H | 0.07287600  | -2.12982000 | 0.00022100  |
| C | 1.63831600  | 0.12587800  | 0.00002800  |
| O | 2.27210800  | 1.16448500  | 0.00024800  |
| O | 2.25317900  | -1.08749100 | -0.00025100 |
| H | 3.21249700  | -0.91302100 | -0.00028900 |

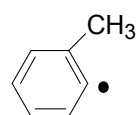

SCF energy=-270.8930393

|   |             |             |             |
|---|-------------|-------------|-------------|
| C | 1.89846300  | 0.00081700  | -0.00001500 |
| C | 1.22770900  | -1.23627700 | -0.00000300 |
| C | -0.14802200 | -1.19431500 | 0.00002300  |
| C | -0.94826100 | -0.06441300 | 0.00003300  |
| C | -0.24174800 | 1.15509000  | 0.00002300  |
| C | 1.15788700  | 1.18580300  | 0.00000200  |
| H | 2.98577200  | 0.02865000  | -0.00004500 |
| H | 1.77913500  | -2.17333000 | -0.00001500 |
| H | -0.80262900 | 2.08869500  | 0.00000600  |
| H | 1.67131400  | 2.14391800  | -0.00004300 |
| C | -2.45861000 | -0.12343000 | -0.00002400 |
| H | -2.83359100 | -0.65512600 | -0.88274500 |
| H | -2.83367600 | -0.65502500 | 0.88271800  |
| H | -2.89083600 | 0.88257300  | -0.00010500 |

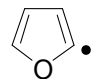

SCF energy=-229.3460489

|   |             |             |             |
|---|-------------|-------------|-------------|
| C | 0.82823400  | 0.73902700  | -0.00025600 |
| C | -0.50380300 | 1.02265200  | 0.00010200  |
| C | -1.21079400 | -0.23974800 | 0.00006300  |
| C | -0.21321200 | -1.16255600 | 0.00013300  |
| H | 1.73240000  | 1.32739400  | 0.00111500  |
| H | -0.94903700 | 2.00920500  | -0.00028400 |
| O | 1.01131100  | -0.63520100 | -0.00009400 |
| H | -2.27639400 | -0.41124000 | -0.00033400 |

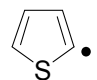

SCF energy=-552.3393404

|   |             |             |             |
|---|-------------|-------------|-------------|
| C | 0.04350000  | 1.18857400  | -0.00017100 |
| C | -1.24052400 | 0.71175500  | -0.00006200 |
| C | -1.31996600 | -0.72857200 | -0.00001700 |
| C | -0.06823200 | -1.25242600 | -0.00008200 |
| H | 0.38052700  | 2.21747100  | 0.00026100  |
| H | -2.11515500 | 1.35505600  | 0.00052500  |
| H | -2.24271400 | -1.29708300 | 0.00030100  |
| S | 1.21804200  | -0.11196400 | 0.00005700  |

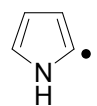

SCF energy=-209.4955011

|   |             |             |             |
|---|-------------|-------------|-------------|
| C | -0.69108000 | 0.88891400  | 0.00004900  |
| C | 0.68801800  | 0.92918500  | -0.00004100 |
| C | 1.18362000  | -0.42100200 | 0.00003300  |

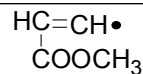

SCF energy=-305.7971308

|   |             |             |             |
|---|-------------|-------------|-------------|
| C | -1.58035600 | 0.29991900  | 0.00007000  |
| H | -2.12443700 | 1.24321800  | 0.00017600  |
| C | -2.19798700 | -0.86365600 | -0.00002600 |
| H | -1.92883300 | -1.91204200 | -0.00015300 |
| C | -0.09338100 | 0.47004200  | -0.00000300 |
| O | 0.45467400  | 1.55454200  | -0.00005500 |
| O | 0.56818000  | -0.70734700 | -0.00002400 |
| C | 2.00593000  | -0.61872500 | 0.00003700  |
| H | 2.35656900  | -1.65103900 | 0.00012700  |
| H | 2.35434500  | -0.09166000 | -0.89206000 |
| H | 2.35428800  | -0.09151500 | 0.89206800  |

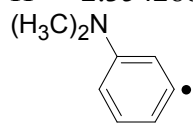

SCF energy=-365.5563974

|   |             |             |             |
|---|-------------|-------------|-------------|
| C | 2.03710400  | 1.07859000  | 0.01141000  |
| C | 2.71944200  | -0.15031600 | 0.03877000  |
| C | 1.90326500  | -1.26011500 | 0.02271900  |
| C | 0.53012200  | -1.28248200 | -0.01943700 |
| C | -0.15099500 | -0.03263100 | -0.06694300 |
| C | 0.64417200  | 1.14118400  | -0.03564900 |
| H | 2.60451800  | 2.00741300  | 0.03000800  |
| H | 3.80326200  | -0.20340000 | 0.07442100  |
| H | 0.17488500  | 2.11753300  | -0.05071000 |
| H | -0.01112300 | -2.22194100 | -0.01534800 |
| N | -1.53770600 | 0.02935500  | -0.15130200 |
| C | -2.31459600 | -1.18364400 | 0.04994100  |
| H | -2.18204600 | -1.61382300 | 1.05704700  |
| H | -3.37341200 | -0.95580000 | -0.09011200 |
| H | -2.04271900 | -1.94772800 | -0.68734400 |
| C | -2.20574600 | 1.30360400  | 0.06573500  |
| H | -1.88601900 | 2.04486100  | -0.67569500 |
| H | -3.28244400 | 1.16489400  | -0.05298400 |
| H | -2.01756900 | 1.71736100  | 1.07055400  |

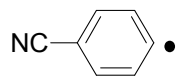

SCF energy=-323.8330989

|   |             |             |            |
|---|-------------|-------------|------------|
| C | 0.15562200  | -1.22424100 | 0.00000000 |
| C | 1.55691000  | -1.22954900 | 0.00000000 |
| C | 2.18181300  | 0.00000000  | 0.00000000 |
| C | 1.55690900  | 1.22955000  | 0.00000000 |
| C | 0.15562200  | 1.22424100  | 0.00000000 |
| C | -0.53963500 | 0.00000000  | 0.00000000 |
| H | -0.39823700 | -2.15885800 | 0.00000000 |
| H | 2.10876700  | -2.16553200 | 0.00000000 |
| H | 2.10876700  | 2.16553200  | 0.00000000 |
| H | -0.39823800 | 2.15885800  | 0.00000000 |
| C | -1.97514900 | 0.00000000  | 0.00000000 |
| N | -3.13908800 | 0.00000000  | 0.00000000 |

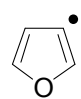

SCF energy=-229.3450925

|   |             |             |             |
|---|-------------|-------------|-------------|
| C | -0.74737300 | 0.79593800  | -0.00000200 |
| C | -1.12401600 | -0.51815100 | 0.00000100  |
| C | 0.11242800  | -1.22509900 | 0.00002700  |
| C | 1.14319700  | -0.34918400 | -0.00004100 |
| H | -1.30068700 | 1.72352900  | -0.00000300 |
| H | -2.13063200 | -0.91088100 | -0.00005000 |
| O | 0.61343700  | 0.92345100  | 0.00001400  |
| H | 2.21840900  | -0.42127900 | 0.00003600  |

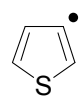

SCF energy=-552.3424759

|   |             |             |             |
|---|-------------|-------------|-------------|
| C | 0.05904100  | -1.20368700 | 0.00001800  |
| N | -1.07127300 | -0.44630400 | -0.00006000 |
| H | -2.01789500 | -0.79543100 | 0.00003700  |
| H | -1.42942100 | 1.67845200  | 0.00010500  |
| H | 1.29465400  | 1.82619100  | -0.00008300 |
| H | 2.21397400  | -0.74554900 | 0.00000700  |

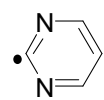

SCF energy=-263.6644967

|   |             |             |             |
|---|-------------|-------------|-------------|
| C | -0.00000700 | 1.32778400  | -0.00000700 |
| N | 1.19225800  | 0.78564400  | -0.00000300 |
| C | 1.19230800  | -0.56256400 | 0.00000500  |
| C | 0.00000800  | -1.28928500 | 0.00000700  |
| C | -1.19230100 | -0.56257500 | 0.00000200  |
| N | -1.19227000 | 0.78563100  | -0.00000600 |
| H | 2.16379700  | -1.05225200 | 0.00000900  |
| H | 0.00001300  | -2.37455900 | 0.00001300  |
| H | -2.16378300 | -1.05227700 | 0.00000400  |

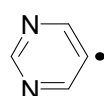

SCF energy=-263.6544223

|   |             |             |             |
|---|-------------|-------------|-------------|
| C | 0.00012000  | 1.24311800  | -0.00000100 |
| N | 1.20019500  | 0.65294200  | -0.00000100 |
| C | 1.20386800  | -0.69544100 | 0.00002500  |
| C | -0.00020800 | -1.36803500 | 0.00000600  |
| C | -1.20400600 | -0.69519700 | -0.00003600 |
| N | -1.19997600 | 0.65320700  | 0.00000000  |
| H | 2.17149700  | -1.19056200 | 0.00000300  |
| H | 0.00026400  | 2.33079700  | 0.00000600  |
| H | -2.17193200 | -1.18995600 | 0.00002800  |

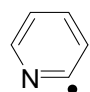

SCF energy=-247.6236929

|   |             |             |             |
|---|-------------|-------------|-------------|
| C | -0.24015300 | -1.35757700 | -0.00026700 |
| C | -1.33649800 | -0.49542400 | -0.00011200 |
| C | -1.02422300 | 0.86749900  | 0.00007300  |
| C | 0.31943000  | 1.27056200  | 0.00023100  |
| C | 1.31576000  | 0.29697200  | 0.00017600  |
| N | 1.00210900  | -1.01783800 | -0.00015700 |
| H | -1.81939700 | 1.61018100  | 0.00014500  |
| H | -2.36045000 | -0.85391600 | -0.00021600 |
| H | 0.58720400  | 2.32322400  | 0.00038900  |
| H | 2.37198900  | 0.55317900  | 0.00018300  |

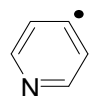

SCF energy=-247.6165635

|   |             |             |             |
|---|-------------|-------------|-------------|
| C | 1.14641300  | -0.65981500 | 0.00009900  |
| C | 1.21462200  | 0.74714500  | 0.00022300  |
| C | 0.00000100  | 1.39350100  | 0.00007500  |
| C | -1.21462000 | 0.74714700  | -0.00013300 |
| C | -1.14641400 | -0.65981400 | -0.00016500 |
| N | -0.00000100 | -1.34753200 | -0.00008000 |
| H | 2.06393800  | -1.24687800 | 0.00019300  |
| H | 2.17294000  | 1.25874500  | 0.00038100  |
| H | -2.17293900 | 1.25874600  | -0.00025500 |
| H | -2.06394100 | -1.24687300 | -0.00035700 |

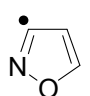

SCF energy=-245.3548079

|   |             |             |            |
|---|-------------|-------------|------------|
| C | -0.21640200 | -1.15260900 | 0.00010400 |
| C | 1.07902200  | -0.56600900 | 0.00002900 |

|   |             |             |             |
|---|-------------|-------------|-------------|
| C | 0.43727100  | -1.13168100 | 0.00003100  |
| C | 1.49112500  | -0.25028300 | 0.00022500  |
| C | 1.00179900  | 1.08039700  | -0.00013500 |
| C | -0.33632700 | 1.26050300  | 0.00000500  |
| H | 0.47382900  | -2.21410700 | -0.00023500 |
| H | 2.53523500  | -0.53944300 | -0.00049100 |
| H | -0.93266000 | 2.16203900  | 0.00023600  |
| S | -1.10247600 | -0.32263200 | -0.00001700 |

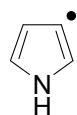

SCF energy=-209.4962866

|   |             |             |             |
|---|-------------|-------------|-------------|
| C | 0.67481100  | 0.88822300  | -0.00000200 |
| C | 1.19067600  | -0.40013500 | 0.00000600  |
| C | 0.05942600  | -1.24607800 | 0.00000600  |
| C | -1.10088400 | -0.51625700 | -0.00000600 |
| N | -0.69911100 | 0.80969000  | -0.00001100 |
| H | -1.32249500 | 1.60465000  | 0.00009300  |
| H | 1.17827600  | 1.84559100  | -0.00002600 |
| H | 2.23645100  | -0.67336100 | -0.00000100 |
| H | -2.14263600 | -0.79922800 | -0.00000900 |

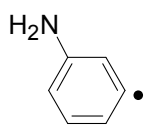

SCF energy=-286.9416104

|   |             |             |             |
|---|-------------|-------------|-------------|
| C | 0.09668900  | -1.16552200 | -0.00459400 |
| C | 0.90925400  | -0.01516400 | -0.00750300 |
| C | 0.28560600  | 1.25428900  | -0.00294700 |
| C | -1.08911700 | 1.27781700  | 0.00367500  |
| C | -1.93442800 | 0.18860300  | 0.00766600  |
| C | -1.29511600 | -1.06482600 | 0.00352200  |
| H | 0.56539100  | -2.14726900 | -0.01566000 |
| H | -3.01671800 | 0.27558300  | 0.01285300  |
| H | -1.89466300 | -1.97302400 | 0.00676100  |
| H | 0.88252200  | 2.16432600  | -0.01061600 |
| N | 2.30218800  | -0.12263500 | -0.07501700 |
| H | 2.82021500  | 0.67966700  | 0.26224500  |
| H | 2.69060100  | -0.99202400 | 0.27062900  |

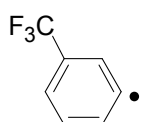

SCF energy=-568.6664025

|   |             |             |             |
|---|-------------|-------------|-------------|
| C | -0.82618600 | 1.13747300  | -0.01619900 |
| C | -0.08648500 | -0.05243200 | -0.02546700 |
| C | -0.73913200 | -1.29777900 | -0.01527900 |
| C | -2.11585000 | -1.26396500 | 0.00221100  |
| C | -2.89964800 | -0.13134500 | 0.01062500  |
| C | -2.22188200 | 1.10090800  | 0.00112800  |
| H | -3.98543300 | -0.17348600 | 0.02233400  |
| H | -2.78805100 | 2.02899800  | 0.00488200  |
| H | -0.30969600 | 2.09234300  | -0.02698700 |
| C | 1.41932900  | 0.01559400  | -0.00306400 |
| H | -0.17648400 | -2.22587200 | -0.02526100 |
| F | 1.89175400  | 0.32540800  | 1.23527800  |
| F | 1.89834600  | 0.96797900  | -0.84374100 |
| F | 1.99643200  | -1.15702100 | -0.35805900 |

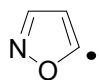

SCF energy=-245.3513867

|   |             |             |             |
|---|-------------|-------------|-------------|
| C | -0.66839700 | 0.85695900  | 0.00010000  |
| C | -1.11129500 | -0.49878300 | 0.00004200  |
| C | 0.08377800  | -1.15343100 | -0.00008000 |
| O | 1.13342300  | -0.37738500 | -0.00006000 |
| H | -1.26823000 | 1.75986200  | 0.00017100  |
| H | -2.11185100 | -0.90004200 | 0.00007000  |
| N | 0.64116900  | 0.99011400  | -0.00001900 |

|   |             |             |             |
|---|-------------|-------------|-------------|
| C | 0.75773600  | 0.75943500  | 0.00005400  |
| O | -0.57892000 | 0.94905800  | -0.00030200 |
| N | -1.21340400 | -0.35159500 | 0.00017600  |
| H | 1.35442900  | 1.66195800  | 0.00001800  |
| H | 2.04863000  | -1.03816200 | 0.00004800  |

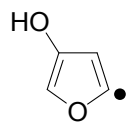

SCF energy=-304.5694113

|   |             |             |             |
|---|-------------|-------------|-------------|
| C | 0.24514400  | -1.07135500 | 0.01324900  |
| C | -0.65321500 | -0.04479300 | 0.00620400  |
| C | 0.08768400  | 1.19935400  | -0.00114900 |
| C | 1.38271500  | 0.78439100  | -0.01124100 |
| H | 0.17211500  | -2.14600900 | 0.00082800  |
| H | -0.29315800 | 2.21015400  | -0.01651300 |
| O | -2.00813200 | -0.20474400 | -0.03803200 |
| H | -2.44670100 | 0.61447700  | 0.23689300  |
| O | 1.53235400  | -0.53078100 | 0.00508400  |

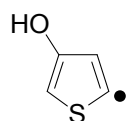

SCF energy=-627.517477

|   |             |             |             |
|---|-------------|-------------|-------------|
| C | -0.01042400 | -1.04911600 | 0.00006700  |
| C | 0.97143300  | -0.09415600 | 0.00005500  |
| C | 0.47021800  | 1.26199100  | 0.00002900  |
| C | -0.88550600 | 1.23450400  | -0.00012400 |
| S | -1.60705000 | -0.31832300 | 0.00002400  |
| H | 0.10680600  | -2.12427300 | -0.00017000 |
| H | 1.08949100  | 2.15299600  | 0.00002400  |
| O | 2.29965300  | -0.42843100 | -0.00015800 |
| H | 2.84494600  | 0.37254700  | 0.00086400  |

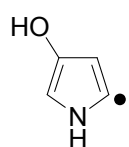

SCF energy=-284.7159724

|   |             |             |             |
|---|-------------|-------------|-------------|
| C | 0.25876400  | -1.07244800 | -0.03392600 |
| C | -0.66792400 | -0.03914700 | -0.02826700 |
| C | 0.02801200  | 1.20432900  | -0.03145700 |
| C | 1.36711800  | 0.86871300  | 0.08419000  |
| N | 1.51513100  | -0.48018800 | -0.03855900 |
| H | 2.38863500  | -0.98059200 | 0.03018300  |
| H | 0.11943600  | -2.13604900 | 0.09582700  |
| H | -0.39620600 | 2.19898700  | -0.05840700 |
| O | -2.01794000 | -0.25629400 | 0.05333700  |
| H | -2.49008400 | 0.56063700  | -0.16762900 |

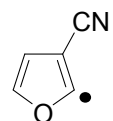

SCF energy=-321.5994532

|   |             |             |             |
|---|-------------|-------------|-------------|
| C | -0.47552100 | -1.11714600 | -0.00009800 |
| C | 0.37476700  | -0.04350800 | -0.00021200 |
| C | -0.52099700 | 1.10219700  | -0.00012700 |
| C | -1.78665600 | 0.61297400  | 0.00013300  |
| O | -1.75141300 | -0.77798200 | 0.00010200  |
| H | -0.22002500 | 2.14080800  | 0.00010100  |
| H | -2.77252900 | 1.04997800  | 0.00005000  |
| C | 1.79314100  | -0.03981000 | -0.00004100 |
| N | 2.95649300  | -0.00788300 | 0.00015700  |

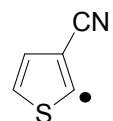

SCF energy=-644.5932019

|   |             |             |             |
|---|-------------|-------------|-------------|
| C | -0.18355000 | -1.04308000 | -0.00029000 |
| C | 0.71322600  | -0.01050100 | -0.00058700 |
| C | -0.00124000 | 1.25104500  | 0.00013700  |

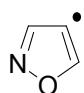

SCF energy=-245.3478016

|   |             |             |             |
|---|-------------|-------------|-------------|
| C | 1.11615600  | 0.38897000  | -0.00016700 |
| C | -0.02742500 | 1.22086100  | 0.00018900  |
| C | -1.10023500 | 0.39437200  | 0.00004700  |
| O | -0.65221700 | -0.88202900 | -0.00049200 |
| H | 2.16717100  | 0.64399400  | 0.00010700  |
| N | 0.75579900  | -0.87781100 | 0.00049200  |
| H | -2.17099900 | 0.53169500  | -0.00003700 |

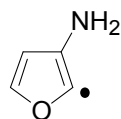

SCF energy=-284.7047019

|   |             |             |             |
|---|-------------|-------------|-------------|
| C | 0.07844800  | -1.22917600 | 0.00008900  |
| C | -0.69001400 | 0.01247200  | 0.00000800  |
| C | 0.17793200  | 1.14272700  | 0.00008200  |
| C | 1.43036200  | 0.60064800  | -0.00001300 |
| O | 1.38215200  | -0.77245100 | -0.00001400 |
| H | -0.06921600 | 2.19643100  | 0.00009800  |
| H | 2.41584200  | 1.04787800  | -0.00025000 |
| N | -2.03930800 | -0.01735900 | -0.00029400 |
| H | -2.50010000 | -0.91904600 | 0.00058900  |
| H | -2.60896100 | 0.81583200  | 0.00074500  |

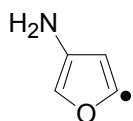

SCF energy=-284.7040514

|   |             |             |             |
|---|-------------|-------------|-------------|
| C | -1.42480000 | 0.75524500  | -0.01519200 |
| C | -0.14149500 | 1.20007500  | -0.00153000 |
| C | 0.64523500  | -0.01967100 | 0.00542700  |
| C | -0.23858000 | -1.06419300 | 0.02133300  |
| O | -1.54537100 | -0.56382500 | 0.01124400  |
| H | -0.14799600 | -2.13849300 | -0.00637000 |
| H | 0.21548100  | 2.21884500  | -0.03061300 |
| N | 2.04316800  | -0.05906300 | -0.09400100 |
| H | 2.51390100  | 0.60099300  | 0.51673200  |
| H | 2.43724900  | -0.98603500 | 0.02807300  |

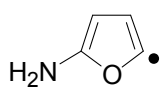

SCF energy=-284.7016582

|   |             |             |             |
|---|-------------|-------------|-------------|
| C | 1.39610500  | 0.90327400  | -0.09794200 |
| C | 1.56956600  | -0.49789800 | 0.02675200  |
| C | 0.31803700  | -1.13312200 | 0.01375200  |
| C | -0.61469600 | -0.09280400 | 0.04057100  |
| O | 0.00594500  | 1.10610000  | 0.05362600  |
| H | 2.53657400  | -0.98432700 | 0.04580700  |
| H | 0.08964100  | -2.19012900 | -0.03839100 |
| N | -1.96440400 | -0.08024600 | -0.07155500 |
| H | -2.47565800 | -0.94964400 | -0.02757300 |
| H | -2.46136500 | 0.76031700  | 0.19323800  |

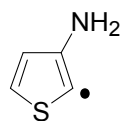

SCF energy=-607.6979249

|   |             |             |             |
|---|-------------|-------------|-------------|
| C | -0.08522900 | -1.20009900 | -0.00012400 |
| C | -0.97324500 | -0.06046500 | -0.00007600 |
| C | -0.38100200 | 1.25569300  | -0.00009200 |
| C | 0.97809300  | 1.17586800  | 0.00022100  |
| S | 1.48883700  | -0.53125400 | -0.00000300 |
| H | -0.94065600 | 2.18676300  | -0.00035100 |
| H | 1.68531400  | 1.99818200  | -0.00018200 |
| N | -2.31000500 | -0.27788500 | 0.00022900  |
| H | -2.63789500 | -1.23580200 | -0.00002400 |
| H | -2.98983000 | 0.47012500  | -0.00056300 |

|   |             |             |             |
|---|-------------|-------------|-------------|
| C | -1.35715200 | 1.09579000  | 0.00037300  |
| S | -1.82915000 | -0.59400100 | 0.00010500  |
| H | 0.50372500  | 2.21074400  | -0.00140500 |
| H | -2.12056000 | 1.86336400  | -0.00036800 |
| C | 2.13288000  | -0.13717900 | -0.00009800 |
| N | 3.29403700  | -0.21521900 | 0.00041200  |

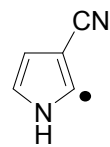

SCF energy=-301.7536573

|   |             |             |             |
|---|-------------|-------------|-------------|
| C | -1.77704400 | 0.66916200  | 0.00003500  |
| C | -0.47729500 | 1.11158000  | -0.00014800 |
| C | 0.39070700  | -0.04475600 | 0.00004500  |
| C | -0.46615700 | -1.12708900 | 0.00004800  |
| N | -1.75377400 | -0.72311500 | -0.00003500 |
| H | -2.56084200 | -1.33010800 | 0.00000900  |
| H | -0.14309000 | 2.14019300  | -0.00027200 |
| C | 1.80927800  | -0.05522400 | 0.00004900  |
| N | 2.97382100  | -0.03980400 | 0.00003800  |
| H | -2.71332400 | 1.20830800  | 0.00007000  |

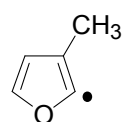

SCF energy=-268.662901

|   |             |             |             |
|---|-------------|-------------|-------------|
| C | -0.15978500 | -1.10494200 | 0.00003100  |
| C | 0.69639300  | -0.04689200 | -0.00011100 |
| C | -0.20779900 | 1.08968100  | -0.00002900 |
| C | -1.48139700 | 0.60937700  | -0.00001700 |
| O | -1.45554200 | -0.77351400 | 0.00000800  |
| H | 0.08240300  | 2.13345200  | 0.00015200  |
| H | -2.46305300 | 1.05738800  | 0.00015600  |
| C | 2.19480600  | -0.03318500 | 0.00003300  |
| H | 2.58898000  | 0.48343600  | 0.88403500  |
| H | 2.59353600  | -1.05209400 | 0.00106300  |
| H | 2.58915700  | 0.48169700  | -0.88490800 |

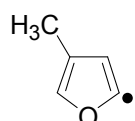

SCF energy=-268.6633416

|   |             |             |             |
|---|-------------|-------------|-------------|
| C | 1.46501700  | 0.74542800  | -0.00026300 |
| C | 0.18631100  | 1.20158800  | 0.00020800  |
| C | -0.61960800 | -0.00793500 | 0.00024500  |
| C | 0.25748900  | -1.05207400 | 0.00007900  |
| O | 1.56539400  | -0.58221000 | -0.00001600 |
| H | 0.15032500  | -2.12616800 | 0.00001100  |
| H | -0.15421000 | 2.22664800  | 0.00000600  |
| C | -2.11836600 | -0.07884700 | -0.00013100 |
| H | -2.46160900 | -1.11920800 | -0.00128900 |
| H | -2.54154100 | 0.41281100  | 0.88457900  |
| H | -2.54116800 | 0.41463800  | -0.88400600 |

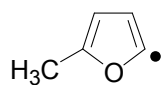

SCF energy=-268.666376

|   |             |             |             |
|---|-------------|-------------|-------------|
| C | -1.36086000 | 0.85796300  | -0.00022700 |
| C | -1.65690200 | -0.46601000 | 0.00001900  |
| C | -0.35529100 | -1.10169600 | 0.00011900  |
| C | 0.59207000  | -0.11981300 | 0.00016800  |
| O | -0.05063000 | 1.11816900  | 0.00016500  |
| H | -2.63073200 | -0.93168600 | -0.00030200 |
| H | -0.16394800 | -2.16744600 | -0.00010300 |
| C | 2.07914400  | -0.09617000 | -0.00012600 |
| H | 2.47595200  | 0.41453500  | 0.88633800  |
| H | 2.45925800  | -1.12258000 | -0.00117000 |
| H | 2.47554000  | 0.41618700  | -0.88580100 |

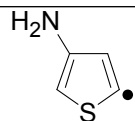

SCF energy=-607.6513752

|   |             |             |             |
|---|-------------|-------------|-------------|
| C | -0.93034600 | 1.22141800  | -0.00896200 |
| C | 0.42227300  | 1.27799800  | -0.00133900 |
| C | 0.97122800  | -0.06413500 | 0.00299300  |
| C | -0.00131700 | -1.03567000 | 0.01393800  |
| S | -1.62156700 | -0.34685900 | 0.00481600  |
| H | 0.12350500  | -2.11116600 | -0.00619800 |
| H | 1.02148500  | 2.18159200  | -0.02744900 |
| N | 2.35470400  | -0.28829500 | -0.09098300 |
| H | 2.91540900  | 0.34765700  | 0.46665900  |
| H | 2.63071900  | -1.24794800 | 0.08703400  |

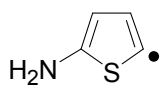

SCF energy=-607.6936163

|   |             |             |             |
|---|-------------|-------------|-------------|
| C | -1.67926900 | -0.30257400 | -0.11494100 |
| C | -1.44575700 | 1.04151100  | 0.02769800  |
| C | -0.05156700 | 1.35791900  | 0.02983100  |
| C | 0.75713200  | 0.23655300  | 0.06930200  |
| S | -0.23229600 | -1.24135000 | 0.01669300  |
| H | -2.22914700 | 1.78546000  | 0.13332200  |
| H | 0.34306400  | 2.37021000  | -0.00176600 |
| N | 2.12540600  | 0.16126400  | -0.10232200 |
| H | 2.60366900  | 1.03953900  | -0.26354300 |
| H | 2.63808300  | -0.46291000 | 0.50981000  |

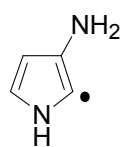

SCF energy=-264.8614106

|   |             |             |             |
|---|-------------|-------------|-------------|
| C | 1.41785400  | 0.67631700  | -0.00009700 |
| C | 0.12860100  | 1.15857400  | 0.00010800  |
| C | -0.69986400 | -0.00204900 | 0.00013700  |
| C | 0.09299000  | -1.23762100 | 0.00002500  |
| N | 1.35560100  | -0.72189000 | -0.00004700 |
| H | 2.17856700  | -1.30859000 | -0.00031900 |
| H | -0.16633200 | 2.20048800  | -0.00009300 |
| H | 2.36227900  | 1.20741200  | -0.00001800 |
| N | -2.05282300 | -0.05891500 | 0.00047300  |
| H | -2.49456200 | -0.96919200 | -0.00134500 |
| H | -2.63688700 | 0.76418900  | -0.00224200 |

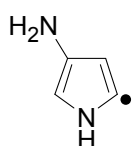

SCF energy=-264.8481215

|   |             |             |             |
|---|-------------|-------------|-------------|
| C | -0.24807400 | -1.06667700 | 0.04046200  |
| C | 0.66159400  | -0.00788900 | 0.02965000  |
| C | -0.08757300 | 1.20762000  | 0.03310900  |
| C | -1.41694100 | 0.83822900  | -0.08771200 |
| N | -1.52296600 | -0.51674600 | 0.04178700  |
| H | -2.38133600 | -1.04413100 | -0.00750500 |
| H | -0.08769400 | -2.12635700 | -0.11022400 |
| H | 0.30951800  | 2.21347200  | 0.03441700  |
| N | 2.05324600  | -0.11054800 | -0.11121400 |
| H | 2.57379100  | 0.56469600  | 0.43856700  |
| H | 2.41972900  | -1.04431900 | 0.03768300  |

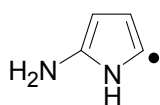

SCF energy=-264.8483926

|   |             |             |             |
|---|-------------|-------------|-------------|
| C | 0.62834300  | -0.08117700 | 0.05281700  |
| C | -0.29208300 | -1.13931100 | 0.01506600  |
| C | -1.56816100 | -0.55055800 | 0.01806800  |
| C | -1.44669600 | 0.86376100  | -0.10413500 |

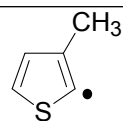

SCF energy=-591.6564999

|   |             |             |             |
|---|-------------|-------------|-------------|
| C | -0.06289400 | -1.05652600 | -0.00001800 |
| C | -1.01196000 | -0.08439500 | -0.00007100 |
| C | -0.34357900 | 1.20076500  | 0.00005800  |
| C | 1.02241100  | 1.12539500  | -0.00003300 |
| S | 1.57766700  | -0.53608800 | 0.00001800  |
| H | -0.88582000 | 2.14279900  | 0.00000500  |
| H | 1.74129500  | 1.93523600  | -0.00008400 |
| C | -2.50530200 | -0.27458900 | 0.00002000  |
| H | -2.76516100 | -1.33701100 | 0.00110400  |
| H | -2.96259700 | 0.18718000  | 0.88410600  |
| H | -2.96244000 | 0.18530500  | -0.88514600 |

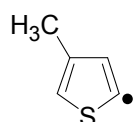

SCF energy=-591.656623

|   |             |             |             |
|---|-------------|-------------|-------------|
| C | 0.97802200  | 1.21579900  | 0.00000500  |
| C | -0.37451800 | 1.29006100  | 0.00000400  |
| C | -0.95071000 | -0.04063900 | 0.00000500  |
| C | 0.00831000  | -1.02067500 | 0.00002600  |
| S | 1.63857100  | -0.37022900 | -0.00001000 |
| H | -0.13742200 | -2.09426400 | 0.00001100  |
| H | -0.95541500 | 2.20611200  | 0.00001000  |
| C | -2.43517500 | -0.29546000 | -0.00000700 |
| H | -2.91509500 | 0.14341800  | 0.88398900  |
| H | -2.91502800 | 0.14322600  | -0.88414700 |
| H | -2.64974700 | -1.36934200 | 0.00008900  |

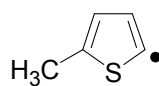

SCF energy=-591.6567476

|   |             |             |             |
|---|-------------|-------------|-------------|
| C | -1.67726600 | -0.33267200 | -0.00004900 |
| C | -1.52591400 | 1.01288000  | 0.00001000  |
| C | -0.11937200 | 1.34178500  | 0.00001300  |
| C | 0.71975400  | 0.25799300  | 0.00001800  |
| S | -0.21673800 | -1.24323400 | 0.00001400  |
| H | -2.32902600 | 1.74095300  | 0.00000500  |
| H | 0.24688400  | 2.36508600  | 0.00000500  |
| C | 2.21988800  | 0.23229100  | -0.00001800 |
| H | 2.62384400  | -0.27421400 | 0.88547600  |
| H | 2.62381700  | -0.27382200 | -0.88575200 |
| H | 2.59976200  | 1.26008400  | 0.00020400  |

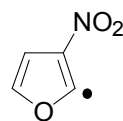

SCF energy=-433.8400976

|   |             |             |             |
|---|-------------|-------------|-------------|
| C | 0.78203000  | -1.11959300 | -0.00035200 |
| C | -0.02575900 | -0.01841600 | 0.00008500  |
| C | 0.86315500  | 1.11495200  | 0.00063900  |
| C | 2.11820500  | 0.59909700  | 0.00030200  |
| O | 2.05838100  | -0.79834200 | -0.00039300 |
| H | 0.57160800  | 2.15534000  | 0.00004200  |
| N | -1.45815000 | -0.01509600 | 0.00010900  |
| O | -2.03475600 | -1.10474300 | 0.00048300  |
| O | -2.01167700 | 1.08827100  | -0.00066500 |
| H | 3.11406600  | 1.01261000  | -0.00024700 |

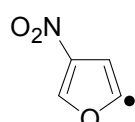

SCF energy=-433.8425076

|   |             |             |             |
|---|-------------|-------------|-------------|
| C | -2.09660400 | 0.72934900  | 0.00032700  |
| C | -0.83870000 | 1.23219000  | -0.00028100 |
| C | -0.03413900 | 0.03647600  | -0.00095000 |
| C | -0.85650100 | -1.05540600 | -0.00021900 |
| O | -2.14984800 | -0.61231600 | 0.00027800  |

|   |             |             |             |
|---|-------------|-------------|-------------|
| N | -0.09297200 | 1.10171600  | 0.07909700  |
| H | 0.33128900  | 1.99571900  | -0.12979300 |
| H | -2.51063400 | -1.07989300 | 0.08460600  |
| H | -0.03528900 | -2.19201200 | -0.00922200 |
| N | 1.99683900  | -0.08357900 | -0.10105500 |
| H | 2.52480900  | 0.58881200  | 0.44492300  |
| H | 2.43433900  | -0.99587300 | -0.12770700 |

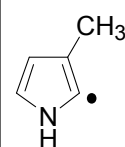

SCF energy=-248.8111269

|   |             |             |             |
|---|-------------|-------------|-------------|
| C | -1.46705700 | 0.67614900  | 0.00261900  |
| C | -0.15372400 | 1.09635400  | -0.00259800 |
| C | 0.71197900  | -0.05771300 | -0.00220600 |
| C | -0.15898400 | -1.11759200 | -0.00666800 |
| N | -1.46013700 | -0.71002100 | 0.00620300  |
| H | -2.26983900 | -1.31086900 | -0.00840900 |
| H | -2.39547400 | 1.23012800  | -0.00345300 |
| H | 0.17949300  | 2.12777600  | -0.00619900 |
| C | 2.21313200  | -0.07196500 | 0.00265400  |
| H | 2.61744900  | 0.43073500  | 0.89063800  |
| H | 2.59369700  | -1.09838800 | -0.00121800 |
| H | 2.62355900  | 0.43936800  | -0.87759000 |

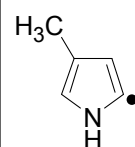

SCF energy=-248.811542

|   |             |             |             |
|---|-------------|-------------|-------------|
| C | 0.27015100  | -1.05849400 | -0.00052900 |
| C | -0.63170200 | -0.01353100 | -0.00038400 |
| C | 0.12598700  | 1.21570400  | -0.00038400 |
| C | 1.43947700  | 0.82958200  | 0.00060000  |
| N | 1.55530100  | -0.52404300 | 0.00011000  |
| H | 2.41698100  | -1.04771600 | 0.00050500  |
| H | 0.11271000  | -2.12869000 | 0.00003100  |
| H | -0.26651500 | 2.22280700  | -0.00095300 |
| C | -2.13064200 | -0.12470800 | 0.00035800  |
| H | -2.57232300 | 0.34966400  | 0.88621800  |
| H | -2.57363200 | 0.35608100  | -0.88133900 |
| H | -2.44395300 | -1.17516800 | -0.00319800 |

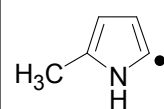

SCF energy=-248.8126106

|   |             |             |             |
|---|-------------|-------------|-------------|
| C | -0.60245300 | 0.09331000  | -0.02796600 |
| C | 0.33923000  | 1.10473300  | -0.00590100 |
| C | 1.65372300  | 0.52106300  | 0.00172900  |
| C | 1.43518500  | -0.83066000 | 0.04012800  |
| N | 0.10125800  | -1.10863000 | -0.03652400 |
| H | -0.31081100 | -2.02757900 | 0.03296200  |
| H | 2.60283800  | 1.03685000  | -0.01689000 |
| H | 0.11743800  | 2.16525100  | 0.01123600  |
| C | -2.09724300 | 0.13198400  | 0.01652300  |
| H | -2.55083800 | -0.43068800 | -0.81082100 |
| H | -2.49920600 | -0.27485200 | 0.95524800  |
| H | -2.43888000 | 1.16883900  | -0.06314200 |

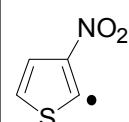

SCF energy=-756.8361033

|   |             |             |             |
|---|-------------|-------------|-------------|
| C | 0.50815600  | -1.02133200 | 0.00030300  |
| C | -0.34782400 | 0.03809800  | -0.00009000 |
| C | 0.35302500  | 1.29108000  | -0.00048300 |
| C | 1.70619900  | 1.11041100  | -0.00036000 |
| S | 2.15488600  | -0.59181900 | 0.00023100  |



|   |             |             |             |
|---|-------------|-------------|-------------|
| H | -0.69364000 | -2.12098900 | 0.00109600  |
| H | -0.50452500 | 2.25706600  | 0.00004800  |
| N | 1.40484100  | -0.02215400 | -0.00004900 |
| O | 2.01375000  | 1.04854800  | 0.00041500  |
| O | 1.92609100  | -1.14081400 | 0.00004900  |

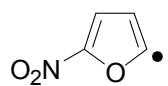

SCF energy=-433.8366622

|   |             |             |             |
|---|-------------|-------------|-------------|
| C | -1.99199200 | -0.82649200 | 0.00007700  |
| C | -2.23770300 | 0.51787500  | -0.00002000 |
| C | -0.92963000 | 1.10223900  | -0.00013000 |
| C | -0.04408000 | 0.05815100  | 0.00001700  |
| O | -0.70427200 | -1.14704700 | 0.00007000  |
| H | -3.19414700 | 1.01791600  | -0.00002300 |
| H | -0.67246500 | 2.15207200  | -0.00016700 |
| N | 1.38075800  | 0.03356600  | -0.00005800 |
| O | 1.94854400  | -1.05803400 | -0.00010900 |
| O | 1.93344500  | 1.14063300  | 0.00015500  |

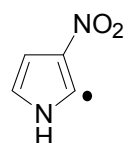

SCF energy=-413.9962855

|   |             |             |             |
|---|-------------|-------------|-------------|
| C | 2.11242400  | 0.65712300  | -0.00027500 |
| C | 0.82365700  | 1.13073800  | 0.00028900  |
| C | -0.03902800 | -0.01246500 | 0.00037300  |
| C | 0.77399500  | -1.12380900 | 0.00032800  |
| N | 2.06410100  | -0.73964200 | -0.00037400 |
| H | 2.86279300  | -1.35871500 | 0.00026600  |
| H | 0.50151700  | 2.16208900  | 0.00030700  |
| N | -1.46733400 | -0.02777700 | -0.00003700 |
| O | -2.04734700 | 1.06346700  | -0.00019500 |
| O | -2.03125900 | -1.12792600 | -0.00007000 |
| H | 3.06088500  | 1.17470100  | 0.00013000  |

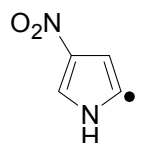

SCF energy=-413.9994541

|   |             |             |             |
|---|-------------|-------------|-------------|
| C | 0.86078200  | -1.05667300 | 0.00043900  |
| C | 0.02262700  | 0.04438700  | 0.00030000  |
| C | 0.79359000  | 1.25443200  | -0.00001300 |
| C | 2.08148000  | 0.80653500  | -0.00060400 |
| N | 2.14043900  | -0.56085000 | 0.00006700  |
| H | 2.98474100  | -1.11576600 | 0.00036700  |
| H | 0.63767600  | -2.11267000 | -0.00008300 |
| N | -1.40964300 | -0.03705500 | -0.00002500 |
| O | -2.04409900 | 1.02145800  | 0.00021000  |
| O | -1.91923300 | -1.16439900 | -0.00041100 |
| H | 0.41779000  | 2.26521500  | 0.00029500  |

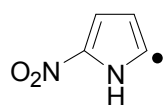

SCF energy=-413.9977575

|   |             |             |             |
|---|-------------|-------------|-------------|
| C | -0.03624900 | 0.06435200  | 0.00000600  |
| C | -0.93837300 | 1.11752700  | 0.00009200  |
| C | -2.24300500 | 0.55342700  | 0.00016500  |
| C | -2.04316600 | -0.81398900 | -0.00037600 |
| N | -0.73453200 | -1.13089700 | 0.00019700  |
| H | -0.29905300 | -2.04437700 | -0.00163600 |
| H | -3.18579700 | 1.07997200  | 0.00036300  |
| N | 1.37935400  | 0.05866100  | 0.00007900  |
| O | 1.94065100  | -1.05115600 | 0.00031800  |
| O | 1.96105600  | 1.14806900  | -0.00036000 |
| H | -0.67779700 | 2.16685700  | 0.00035300  |

|   |             |             |             |
|---|-------------|-------------|-------------|
| H | -0.14935000 | 2.25078700  | -0.00055500 |
| H | 2.48546800  | 1.86208100  | -0.00042000 |
| N | -1.78700300 | -0.09987400 | 0.00006400  |
| O | -2.45553800 | 0.93662900  | 0.00074800  |
| O | -2.24728700 | -1.24340200 | -0.00067200 |

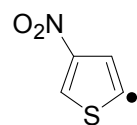

SCF energy=-756.8396894

|   |             |             |             |
|---|-------------|-------------|-------------|
| C | -1.66204700 | 1.20361000  | 0.00001100  |
| C | -0.32110300 | 1.38030400  | -0.00002700 |
| C | 0.29613900  | 0.08081300  | 0.00000100  |
| C | -0.56810500 | -0.98466700 | -0.00001500 |
| S | -2.21139600 | -0.43079000 | 0.00001100  |
| H | -0.31957800 | -2.03720000 | -0.00009200 |
| H | 0.22120800  | 2.31621900  | -0.00006600 |
| N | 1.73837000  | -0.10174300 | 0.00000600  |
| O | 2.16809400  | -1.25756000 | 0.00000100  |
| O | 2.43725700  | 0.91324300  | 0.00001400  |

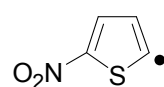

SCF energy=-756.8346301

|   |             |             |             |
|---|-------------|-------------|-------------|
| C | -2.23314100 | -0.22017100 | 0.00029400  |
| C | -2.00178600 | 1.12306000  | -0.00018600 |
| C | -0.59188200 | 1.36259000  | -0.00000800 |
| C | 0.13106300  | 0.19305000  | -0.00010600 |
| S | -0.86673800 | -1.25009200 | -0.00008300 |
| H | -2.75996800 | 1.89706200  | 0.00030200  |
| H | -0.12805500 | 2.34240700  | 0.00027300  |
| N | 1.55976200  | 0.07767400  | 0.00002700  |
| O | 2.21635300  | 1.12224800  | -0.00002400 |
| O | 2.03514400  | -1.06385900 | 0.00009900  |

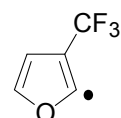

SCF energy=-566.4335807

|   |             |             |             |
|---|-------------|-------------|-------------|
| C | -2.43927900 | 0.60008100  | -0.00001400 |
| C | -1.17765500 | 1.10365300  | -0.00004900 |
| C | -0.27849400 | -0.03041300 | 0.00006100  |
| C | -1.10586400 | -1.11027200 | -0.00001600 |
| O | -2.39051000 | -0.78913300 | 0.00002400  |
| H | -3.42934600 | 1.02783100  | -0.00002400 |
| H | -0.89517200 | 2.14791300  | -0.00003600 |
| C | 1.20668600  | -0.01847800 | -0.00001200 |
| F | 1.70805600  | 0.62862800  | 1.08587300  |
| F | 1.71898800  | -1.26879900 | 0.00164100  |
| F | 1.70809300  | 0.62571400  | -1.08750800 |

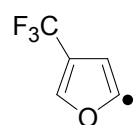

SCF energy=-566.4347059

|   |             |             |             |
|---|-------------|-------------|-------------|
| C | 1.16457100  | -1.04660600 | 0.00017800  |
| C | 0.32885500  | 0.03055700  | 0.00015900  |
| C | 1.14865900  | 1.22341200  | 0.00010700  |
| C | 2.40998900  | 0.72691900  | -0.00018900 |
| O | 2.46802600  | -0.60866500 | -0.00003900 |
| H | 1.01639300  | -2.11477400 | 0.00010100  |
| H | 0.82932800  | 2.25416400  | 0.00008000  |
| C | -1.15942800 | -0.01612200 | -0.00007600 |
| F | -1.68808600 | 0.60191700  | -1.08735900 |
| F | -1.68824200 | 0.60326900  | 1.08656800  |
| F | -1.61764900 | -1.29174600 | 0.00068600  |

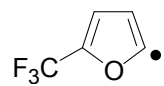

SCF energy=-566.4301594

|   |             |            |            |
|---|-------------|------------|------------|
| C | -0.34239300 | 0.07796800 | 0.00048400 |
|---|-------------|------------|------------|

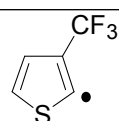

SCF energy=-889.427586

|   |             |             |             |
|---|-------------|-------------|-------------|
| C | -2.04648400 | 1.10011000  | -0.00005400 |
| C | -0.69192200 | 1.27871900  | -0.00000700 |
| C | 0.03694000  | 0.03357700  | 0.00011100  |
| C | -0.82906100 | -1.01320600 | 0.00007300  |
| S | -2.48784300 | -0.59768600 | -0.00000300 |
| H | -2.82297900 | 1.85460800  | 0.00007400  |
| H | -0.20956700 | 2.25062300  | 0.00020400  |
| C | 1.52714100  | -0.07006400 | -0.00002200 |
| F | 2.07406900  | 0.53683500  | -1.08708800 |
| F | 1.94706200  | -1.35336700 | -0.00002500 |
| F | 2.07424200  | 0.53685800  | 1.08702000  |

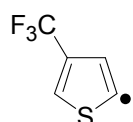

SCF energy=-889.429343

|   |             |             |             |
|---|-------------|-------------|-------------|
| C | 0.87604700  | -0.97520400 | 0.00028000  |
| C | 0.00733600  | 0.08455000  | 0.00035300  |
| C | 0.65595200  | 1.37454000  | 0.00022900  |
| C | 1.99730800  | 1.19265900  | -0.00022400 |
| S | 2.53513500  | -0.44075600 | -0.00004500 |
| H | 0.63900700  | -2.03079000 | 0.00003700  |
| H | 0.13833800  | 2.32626900  | 0.00005500  |
| C | -1.48169000 | -0.06554400 | -0.00006100 |
| F | -1.86441900 | -1.36434100 | 0.00128700  |
| F | -2.04974000 | 0.52176800  | 1.08627500  |
| F | -2.04908900 | 0.51930800  | -1.08787500 |

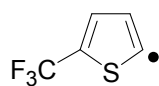

SCF energy=-889.42572

|   |             |             |             |
|---|-------------|-------------|-------------|
| C | 0.15203700  | 0.18660800  | 0.00105100  |
| C | 0.88523900  | 1.34590900  | 0.00063700  |
| C | 2.30506100  | 1.12223200  | -0.00003500 |
| C | 2.54974800  | -0.21257600 | -0.00103100 |
| S | 1.17900700  | -1.24147400 | 0.00032600  |
| H | 0.43325600  | 2.33190900  | 0.00033200  |
| H | 3.05402100  | 1.90507300  | -0.00027400 |
| C | -1.33431700 | 0.06441600  | -0.00004900 |
| F | -1.92294200 | 1.28266600  | 0.00550500  |
| F | -1.79935000 | -0.60359300 | -1.08921100 |
| F | -1.79970800 | -0.61384100 | 1.08273800  |

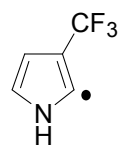

SCF energy=-546.5867249

|   |             |             |             |
|---|-------------|-------------|-------------|
| C | -2.43814000 | 0.65889200  | -0.00003800 |
| C | -1.14180200 | 1.11702200  | -0.00006100 |
| C | -0.26929900 | -0.02657200 | -0.00009200 |
| C | -1.10207700 | -1.11652000 | 0.00000200  |
| N | -2.39909800 | -0.73165800 | 0.00008800  |
| H | -3.19804300 | -1.34881500 | -0.00044200 |
| H | -0.82698000 | 2.15228200  | 0.00001800  |
| H | -3.38052200 | 1.18774400  | 0.00036300  |
| C | 1.21335600  | -0.02649500 | -0.00000400 |
| F | 1.73075500  | 0.61380600  | -1.08577000 |
| F | 1.73066500  | 0.61289200  | 1.08633600  |
| F | 1.71935900  | -1.28309400 | -0.00049800 |

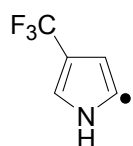

SCF energy=-546.5883699

|   |            |            |             |
|---|------------|------------|-------------|
| C | 1.17065000 | 1.04802300 | -0.00009100 |
|---|------------|------------|-------------|

|   |             |             |             |
|---|-------------|-------------|-------------|
| C | -1.24347300 | 1.10148700  | 0.00041600  |
| C | -2.55523800 | 0.50420200  | -0.00019400 |
| C | -2.29849300 | -0.83182900 | -0.00030500 |
| O | -1.00301700 | -1.13628500 | 0.00008000  |
| H | -1.01110800 | 2.15783000  | 0.00058300  |
| H | -3.51471500 | 0.99809300  | -0.00014600 |
| C | 1.14355600  | 0.03049300  | -0.00028100 |
| F | 1.63867300  | 1.28980300  | 0.00031300  |
| F | 1.64336100  | -0.60986900 | 1.08550300  |
| F | 1.64310000  | -0.60877500 | -1.08601600 |

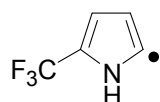

SCF energy=-546.5843536

|   |             |             |             |
|---|-------------|-------------|-------------|
| C | -0.33645900 | -0.05556400 | -0.02940200 |
| C | -1.23354000 | -1.10577200 | -0.01349800 |
| C | -2.55683100 | -0.56102800 | 0.01123100  |
| C | -2.37542200 | 0.79940300  | 0.01847100  |
| N | -1.06181700 | 1.12914100  | -0.00682000 |
| H | -0.67634600 | 2.06236300  | -0.04100700 |
| H | -3.48987200 | -1.10441700 | 0.02158300  |
| C | 1.14460400  | -0.04702100 | -0.00285000 |
| F | 1.65007300  | -1.26057300 | -0.30667800 |
| F | 1.65685200  | 0.30533900  | 1.21329900  |
| F | 1.66179900  | 0.85679900  | -0.88665500 |
| H | -0.97369400 | -2.15613000 | -0.01623600 |

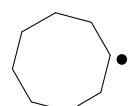

SCF energy=-313.8277421

|   |             |             |             |
|---|-------------|-------------|-------------|
| C | 1.42200900  | 1.29929600  | -0.19131200 |
| C | 1.75086400  | -0.05435100 | 0.47300900  |
| C | -2.01504900 | 0.06747800  | 0.14504400  |
| C | 1.26124500  | -1.34612200 | -0.21452300 |
| C | -1.31682300 | -1.11121300 | -0.46334600 |
| C | -0.17106100 | -1.82782300 | 0.17765300  |
| H | 2.01958200  | 1.39475800  | -1.10980300 |
| H | 1.38929000  | -0.05676800 | 1.51160100  |
| H | 1.32925600  | -1.25031900 | -1.30776700 |
| H | -2.76095200 | 0.44364600  | -0.56784900 |
| H | -1.60463900 | -1.42532700 | -1.46545600 |
| H | 1.78777400  | 2.08571000  | 0.48571100  |
| H | 2.84605800  | -0.10219100 | 0.55212200  |
| H | -2.58180100 | -0.24218900 | 1.04190600  |
| H | 1.95110600  | -2.15520000 | 0.06352000  |
| H | -0.23395400 | -2.89358700 | -0.08807900 |
| H | -0.25360700 | -1.77797100 | 1.27490100  |
| C | -0.05001200 | 1.59687300  | -0.54646100 |
| H | -0.31170100 | 1.05694200  | -1.46596200 |
| H | -0.12130400 | 2.66309200  | -0.79912500 |
| C | -1.07927800 | 1.23831700  | 0.55241200  |
| H | -0.56021600 | 0.97885800  | 1.48316500  |
| H | -1.70626500 | 2.10581800  | 0.79626400  |

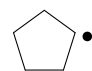

SCF energy=-195.8896683

|   |             |             |             |
|---|-------------|-------------|-------------|
| C | -0.73809000 | 0.99023700  | 0.22249700  |
| C | -1.23678500 | -0.43538300 | -0.12061700 |
| C | -0.00038200 | -1.27861600 | -0.00021600 |
| C | 1.23646600  | -0.43613600 | 0.12074400  |
| C | 0.73875000  | 0.98981100  | -0.22256800 |
| H | -1.32884300 | 1.77911900  | -0.25691200 |
| H | -0.79779000 | 1.14798900  | 1.30793300  |
| H | -1.64373100 | -0.46364500 | -1.14869600 |
| H | -2.05637100 | -0.76912400 | 0.53273600  |
| H | -0.00074100 | -2.36468500 | 0.00020800  |

|   |             |             |             |   |            |             |             |
|---|-------------|-------------|-------------|---|------------|-------------|-------------|
| C | 0.32193300  | -0.04053700 | -0.00002300 | H | 1.64296300 | -0.46452500 | 1.14901500  |
| C | 1.10850400  | -1.24567600 | -0.00010900 | H | 2.05612600 | -0.77035900 | -0.53224300 |
| C | 2.40040500  | -0.80284700 | -0.00008900 | H | 1.32995300 | 1.77830900  | 0.25691900  |
| N | 2.46078400  | 0.55872800  | -0.00002100 | H | 0.79867700 | 1.14744300  | -1.30800100 |
| H | 3.30276000  | 1.11546000  | -0.00005000 |   |            |             |             |
| H | 0.96236200  | 2.10767700  | -0.00010200 |   |            |             |             |
| C | -1.16204500 | 0.02496700  | 0.00005100  |   |            |             |             |
| F | -1.60913600 | 1.30797000  | 0.00008300  |   |            |             |             |
| F | -1.71085800 | -0.58585400 | -1.08595300 |   |            |             |             |
| F | -1.71076200 | -0.58587900 | 1.08609000  |   |            |             |             |
| H | 0.74952200  | -2.26394400 | -0.00011700 |   |            |             |             |
